# Supplementary material for: Correlates of mobile screen media use among children aged 0–8: a systematic review
Source: PubMed Central journal article supplement — BMJ Open. 2017 Oct 24;7(10):e014585. doi: 10.1136/bmjopen-2016-014585 (PMC5665287; doi:10.1136/bmjopen-2016-014585), 2017-10-24
Supplement: bmjopen-2016-014585.draft_revisions.pdf [file bmjopen-2016-014585.draft_revisions.pdf]

# BMJ Open

BMJ Open is committed to open peer review. As part of this commitment we make the peer review history of every article we publish publicly available.

When an article is published we post the peer reviewers' comments and the authors' responses online. We also post the versions of the paper that were used during peer review. These are the versions that the peer review comments apply to.

The versions of the paper that follow are the versions that were submitted during the peer review process. They are not the versions of record or the final published versions. They should not be cited or distributed as the published version of this manuscript.

BMJ Open is an open access journal and the full, final, typeset and author-corrected version of record of the manuscript is available on our site with no access controls, subscription charges or pay-per-view fees (<http://bmjopen.bmj.com>).

If you have any questions on BMJ Open's open peer review process please email [editorial.bmjopen@bmj.com](mailto:editorial.bmjopen@bmj.com)

# BMJ Open

## Correlates of mobile screen media use among children aged 0-8: a systematic review

|                                 |                                                                                                                                                                                                                                                                                                                                                                                                                                                              |
|---------------------------------|--------------------------------------------------------------------------------------------------------------------------------------------------------------------------------------------------------------------------------------------------------------------------------------------------------------------------------------------------------------------------------------------------------------------------------------------------------------|
| Journal:                        | <i>BMJ Open</i>                                                                                                                                                                                                                                                                                                                                                                                                                                              |
| Manuscript ID                   | bmjopen-2016-014585                                                                                                                                                                                                                                                                                                                                                                                                                                          |
| Article Type:                   | Research                                                                                                                                                                                                                                                                                                                                                                                                                                                     |
| Date Submitted by the Author:   | 05-Oct-2016                                                                                                                                                                                                                                                                                                                                                                                                                                                  |
| Complete List of Authors:       | Paudel, Susan; Curtin University School of Public Health, Jancey, Jonine; Curtin University, Collaboration for Evidence, Research and Impact in Public Health (CERIPH), School of Public Health Subedi, Narayan; Maharajgunj Medical Campus, Institute of Medicine, Department of Community Medicine and Public Health Leavy, Justine; Curtin University, Collaboration for Evidence, Research and Impact in Public Health (CERIPH), School of Public Health |
| <b>Primary Subject Heading</b>: | Public health                                                                                                                                                                                                                                                                                                                                                                                                                                                |
| Secondary Subject Heading:      | Epidemiology, Research methods                                                                                                                                                                                                                                                                                                                                                                                                                               |
| Keywords:                       | Children, Mobile media use, Screen time, Correlates, Systematic review                                                                                                                                                                                                                                                                                                                                                                                       |
|                                 |                                                                                                                                                                                                                                                                                                                                                                                                                                                              |

SCHOLARONE™  
Manuscripts

1  
2  
3  
4  
5 **1Title: Correlates of mobile screen media use among children aged 0-**  
6  
7  
8 **28: a systematic review**  
9

10  
11 3 Authors:

12  
13 4 Susan Paudel

14  
15 5 School of Public Health, Curtin University, Western Australia

16  
17  
18 6 [replysusan@gmail.com](mailto:replysusan@gmail.com)  
19

20  
21 7

22  
23 8 Dr.JonineJancey

24  
25 9 Collaboration for Evidence, Research and Impact in Public Health (CERIPH), School of

26  
27 10 Public Health, Curtin University, Western Australia

28  
29  
30 11 [j.jancey@curtin.edu.au](mailto:j.jancey@curtin.edu.au)  
31

32  
33 12

34  
35 13 Narayan Subedi

36  
37 14 Department of Community Medicine and Public Health, Maharajgunj Medical Campus,

38  
39 15 Institute of Medicine, Tribhuvan University

40  
41  
42 16 [subedi.narayan@gmail.com](mailto:subedi.narayan@gmail.com)  
43

44  
45 17

46  
47 18 Dr. Justine Leavy

48  
49 19 Collaboration for Evidence, Research and Impact in Public Health (CERIPH), School of

50  
51 20 Public Health, Curtin University, Western Australia

52  
53  
54 21 [j.leavy@curtin.edu.au](mailto:j.leavy@curtin.edu.au)  
55

56  
57 22  
58  
59  
60

1  
2  
3 **1 Corresponding author:**  
4

5  
6 2 Susan Paudel  
7

8 3 School of Public Health, Curtin University, Western Australia  
9

10 4 Email: [replysusan@gmail.com](mailto:replysusan@gmail.com)  
11

12 5 Contact no: 977-9843061616  
13

14  
15  
16 6

17 7 Word Count: 4647  
18

19  
20 8  
21  
22  
23  
24  
25  
26  
27  
28  
29  
30  
31  
32  
33  
34  
35  
36  
37  
38  
39  
40  
41  
42  
43  
44  
45  
46  
47  
48  
49  
50  
51  
52  
53  
54  
55  
56  
57  
58  
59  
60

For peer review only

1  
2  
3 **1 Abstract**  
4

5  
6 **2 Background**  
7  
8

9  
10 3 Young children (0-8years) are increasingly exposed to mobile screen media devices such as  
11 4 smartphones and tablets. Research indicates these young children are exceeding daily screen  
12 5 time recommendations. This paper systematically reviewed the peer-reviewed literature  
13 6 published between 2009 and 2015 to identify the correlates of mobile screen media use  
14 7 among children eight years or less.  
15  
16  
17  
18  
19

20  
21  
22 **8 Methods**  
23  
24

25 9 Eight electronic databases were searched using keywords such as child\*, preschool, infant,  
26 10 kid and toddler , screen time, screen viewing, mobile phone, cell phone, smartphone\*, PDA,  
27 11 tablet\*, iPad\*, handheld media and handheld computer\*. Peer-reviewed English language  
28 12 primary research papers published or in press between January 2009 and December 2015  
29 13 were eligible for inclusion.  
30  
31  
32  
33  
34  
35  
36

37 **14 Results**  
38  
39

40 15 Eight studies meeting the inclusion criteria were identified of which a total of 29 correlates  
41 16 were examined. Older young children (aged 4-8 years), children better skilled in using  
42 17 mobile screen media devices, those having greater access to such devices at home and whose  
43 18 parents had high mobile screen media use were more likely to have higher use of mobile  
44 19 screen media devices. No association existed with parent's age, gender and education or the  
45 20 child's gender.  
46  
47  
48  
49  
50  
51  
52  
53  
54

55 **21 Conclusion**  
56  
57  
58  
59  
60

1 Limited research has been undertaken into young children's mobile screen media use and  
2 most of the variables were studied too infrequently for a robust conclusion to be reached.  
3 Future studies with objective assessment of mobile screen media use and frequent  
4 examination of the potential correlates across multiple studies and settings are recommended.

5 **Review registration:** This review is registered with PROSPERO International Prospective  
6 Register of Ongoing Systematic Reviews (registration number: CRD42015028028).

### 7 **Keywords**

8 Children, mobile media use, screen time, correlates, systematic review

### 9 **Strengths**

- 10 • This review summarises current peer-reviewed literature on correlates of mobile  
11 screen media use among children aged less than eight-years.
- 12 • It has summarised the findings, and gaps and limitations of the literature and  
13 highlighting areas for future research.
- 14 • The review has adopted a robust research strategy, identified up-to-date key word  
15 with the assistance of a public health librarian; searched eight databases based on a  
16 comprehensive selection criterion.

### 17 **Limitations**

- 18 • All the reviewed studies were cross-sectional in design.
- 19 • Association and consistency could not be determined in this review because the study  
20 findings were segregated across different mobile media types and hence the findings  
21 are largely descriptive.

1  
2  
3  
4  
5  
6  
7  
8  
9  
10  
11  
12  
13  
14  
15  
16  
17  
18  
19  
20  
21  
22  
23  
24  
25  
26  
27  
28  
29  
30  
31  
32  
33  
34  
35  
36  
37  
38  
39  
40  
41  
42  
43  
44  
45  
46  
47  
48  
49  
50  
51  
52  
53  
54  
55  
56  
57  
58  
59  
60

- 1 • Grey literature, non-peer reviewed and non-English papers were not included in this
- 2 review.
- 3
- 4

For peer review only

## 1 BACKGROUND

2 Today young children are increasingly exposed to multiple screens including both the  
3 traditional fixed screens, such as televisions and desktop computers and newer handheld  
4 mobile screen media devices such as smartphones and tablets (1). Specifically, there has been  
5 a rapid uptake of mobile screen media devices in recent years, among young children (2, 3).  
6 This is largely facilitated by the characteristics of handheld devices, such as their portability,  
7 screen size, decreasing cost, multiple applications and interactive ability (4, 5). Because of  
8 the increasing uptake, and use of mobile screen media devices, the daily screen time of  
9 traditional media such as television has decreased while the time spent on the former has  
10 drastically increased (4). This increasing exposure and accessibility to mobile screen media  
11 devices has public health implications, due to its impact on children's sedentary behaviour  
12 and play opportunities, especially considering the evidence that indicates childhood habits  
13 usually track into adulthood (6).

14 Guidelines recommend that children under the age of two should not be exposed to any form  
15 of screen time, while for those aged two-to-five, the daily screen time should be less than one  
16 hour (7, 8). However, a significant percentage of young people are exceeding the  
17 recommended duration of screen time around the world (5). A Western Australian study  
18 reported that nearly half (45%) of year three students (aged eight years) exceeded the screen  
19 time recommendation, and this excessive screen time exposure increased with age (5).  
20 Furthermore, these guidelines on screen time have focused on the use of screen media for  
21 entertainment while the use of these devices for educational purposes, whether at home or at  
22 school, has largely been ignored (5).



1 In an urban community in Philadelphia, USA, nearly half of one-year-old children were  
2 reportedly using mobile screen media devices on a daily basis, with increased use as they  
3 aged(4). Surprisingly, 75% of children had their own mobile device by the age of four (4).  
4 An Australian study reported that 61% of Australians would choose a mobile phone over a  
5 television (9). Similarly, 16% of two- to four-year-old Australian children have access to at  
6 least one screen media in their bedroom (10).

7 Parents are increasingly allowing their young children to use mobile screen media devices,  
8 especially smartphones and tablets, when they are busy doing household chores or shopping,  
9 to calm children in public places or to put children to sleep (3, 4, 11). Research indicates that  
10 they are potentially ignoring the negative impact these devices may have such as these  
11 devices being associated with poor physical and psychosocial health (6, 12-15).

12 Despite the increase in the use of mobile screen media devices such as smartphones,  
13 electronic tablets, handheld computers and Personal Digital Assistants(PDAs) by young  
14 children, very limited research has been carried out to identify the factors associated with  
15 theirincreased use (4). Presently, screen time research is largely dominated by fixed screens  
16 with scant attention paid to mobile screen media devices (16). Systematic reviews to identify  
17 the correlates of mobile screen media use among young children are almost non-existent.  
18 Previous reviews have focused on sedentary behaviours or television viewing (17-19).

19 Considering the increasing availability, ownership and use of mobile screen media devices  
20 (smartphones, electronic tablets, handheld computers, PDAs) among young children,  
21 identification of the correlates of mobile screen media use specific to children eight years and  
22 less is crucial. The purpose of this review is to systematically search and critically review the  
23 published peer-reviewed literature to identify the correlates of mobile screen media use

1 among children eight years or less. Correlates are classified into proximal and distal factors  
2 using a bio-ecological model to facilitate comparison with the existing literature (17, 20).  
3 The model provides a strong theoretical basis to understand human behaviour (21) and has  
4 been described in detail elsewhere(22).

## 5 **METHODS**

6 This systematic review is based on Preferred Reporting Items for Systematic Reviews and  
7 Meta-analyses (PRISMA) statement (23-25) and is registered with PROSPERO International  
8 Prospective Register of Ongoing Systematic Reviews (registration number:  
9 CRD42015028028). The study uses already published, de-identified data and hence is  
10 exempt from the ethics approval process. A detailed description of the methods is available  
11 in the protocol paper(22) .

### 12 ***Outcome measure***

13 Mobile screen media use is the primary outcome measure of this review. There are two sub-  
14 categories within the 0-8 year range, the younger young children defined as 0-3 years and the  
15 older young children defined as 4-8 years. Screen time in the review refers to the total amount  
16 of time spent in front of mobile screens, such as mobile phones, electronic tablets, handheld  
17 computers or PDAs. This review focuses on mobile screen media devices rather than on  
18 traditional fixed screens.

19 Correlates of mobile screen media use have been categorised into five categories as per the  
20 bio-ecological model (17, 18). The five categories are:

- 21 • *Child biological and demographic factors* include age, gender, and body mass index  
22 (BMI).

- 1  
2  
3  
4 1 • *Family biological and demographic factors* include demographic and biological  
5  
6 2 characteristics of the family members (particularly parents) and their education,  
7  
8 3 occupation and income.  
9  
10 4 • *Family structure factors* include the number of siblings, family size and family type.  
11  
12 5 • *Behavioural factors* include the child's behavioural characteristics and their skills and  
13  
14 6 attitudes.  
15  
16 7 • *Sociocultural/ environmental factors* include social, physical and environmental  
17  
18 8 factors within the home setting and community, and parental behavioural factors such  
19  
20 9 as their media skills, beliefs and attitudes towards the media and self-efficacy to limit  
21  
22 10 their children's screen viewing behaviours.  
23  
24  
25  
26  
27

28 11 Direction of association has been reviewed separately for: a) smartphones; b) tablets; c)  
29  
30 12 touchscreens; and d) any media device (defined as the combination of traditional media with  
31  
32 13 at least one form of mobile screen media devices).  
33  
34  
35

#### 36 14 ***Eligibility criteria***

37  
38  
39 15 The studies eligible for inclusion are peer-reviewed primary research papers with screen  
40  
41 16 time, parent-child co-use or adherence to screen time guidelines as the outcome measure that  
42  
43 17 have investigated the correlates of screen time among children under eight years; based in  
44  
45 18 home or community settings; and published, or in press in English language journals between  
46  
47 19 January 2009 to December 2015. The full description of the alignment of the research  
48  
49 20 question to the Population, Exposure, Comparison and Outcome (PECO) format along with  
50  
51 21 the exclusion criteria is detailed in the study protocol (22).  
52  
53  
54  
55

#### 56 22 ***Search strategy and study selection***

1  
2  
3 1 Eight electronic databases: Medline, Scopus, Embase, CINAHL Plus, Pubmed, ProQuest,  
4  
5 2 PsycINFO and Web of Science were searched for papers published between January 2009  
6  
7 3 and December 2015. Child related keywords including child\*, preschool, infant, kid and  
8  
9 4 toddler and screen related keywords including screen time, screen viewing, mobile phone,  
10  
11 5 cell phone, smartphone\*, PDA, tablet\*, iPad\*, handheld media, handheld computer\* were  
12  
13 6 used to locate potential papers in the databases. The search was carried out in September-  
14  
15 7 October 2015. In order to track the papers published beyond this date, email alerts were  
16  
17 8 created in Medline, Scopus and ProQuest. The search commenced with Medline and the  
18  
19 9 identified papers were excluded when searching other databases. However, only Embase,  
20  
21 10 ProQuest and CINAHL Plus provided that option. Duplicate records were manually removed  
22  
23 11 after compiling all the searches. The search strategy used in Medline database is presented in  
24  
25 12 Table 1. A total of 1574 papers were identified through searching these eight databases. To  
26  
27 13 ensure that all relevant papers were identified, a manual search of the reference lists of  
28  
29 14 systematic reviews was also carried out along with the checking of the *Google Scholar*  
30  
31 15 profile of authors with frequent publication in this field. A total of seven papers were  
32  
33 16 retrieved from the manual searching process. Altogether, 1581 papers were identified.  
34  
35  
36  
37  
38  
39  
40  
41  
42  
43  
44  
45  
46  
47  
48  
49  
50  
51  
52  
53  
54  
55  
56  
57  
58  
59  
60

1

**Table 1: Search strategy used in Medline database**

| Database: Ovid Medline (R) 1946 to 20th October 2015 |                                                                                                                                                                                           |         |
|------------------------------------------------------|-------------------------------------------------------------------------------------------------------------------------------------------------------------------------------------------|---------|
| SN                                                   | Search strategy                                                                                                                                                                           | Results |
| 1                                                    | Only Child/ or Child/ or child.mp. or Child, Preschool/                                                                                                                                   | 1767004 |
| 2                                                    | Infant/ or infant.mp.                                                                                                                                                                     | 1030660 |
| 3                                                    | Kid.mp.                                                                                                                                                                                   | 1251    |
| 4                                                    | Toddler.mp.                                                                                                                                                                               | 2240    |
| 5                                                    | 1 or 2 or 3 or 4                                                                                                                                                                          | 2242988 |
| 6                                                    | Screen time.mp.                                                                                                                                                                           | 639     |
| 7                                                    | Smartphones.mp. or Cell Phones/                                                                                                                                                           | 5961    |
| 8                                                    | Mobile phones.mp.                                                                                                                                                                         | 1627    |
| 9                                                    | Handheld computers.mp. or Computers, Handheld/                                                                                                                                            | 2721    |
| 10                                                   | Smartboard.mp.                                                                                                                                                                            | 2       |
| 11                                                   | PDA.mp.                                                                                                                                                                                   | 5860    |
| 12                                                   | Screen media.mp.                                                                                                                                                                          | 42      |
| 13                                                   | Mobile screen.mp.                                                                                                                                                                         | 5       |
| 14                                                   | Microcomputers/ or Computers, Handheld/ or electronic tablets.mp.                                                                                                                         | 16724   |
| 15                                                   | Tablets/ or Tablets.mp.                                                                                                                                                                   | 34967   |
| 16                                                   | Mobile Applications/ or iPads.mp.                                                                                                                                                         | 699     |
| 17                                                   | Handheld media.mp.                                                                                                                                                                        | 1       |
| 18                                                   | Touchscreens.mp.                                                                                                                                                                          | 22      |
| 19                                                   | Mobile devices.mp.                                                                                                                                                                        | 552     |
| 20                                                   | Digital technology.mp.                                                                                                                                                                    | 348     |
| 21                                                   | 6 or 7 or 8 or 9 or 10 or 11 or 12 or 13 or 14 or 15 or 16 or 17 or 18 or 19 or 20                                                                                                        | 64324   |
| 22                                                   | 5 and 21                                                                                                                                                                                  | 6648    |
| 23                                                   | ("Screen-viewing" or "screen time" or "mobile use" or "use of smartphones" or "Cell phone use" or "increased screen time" or "use of electronic tablets" or " use of mobile screens").mp. | 965     |
| 24                                                   | 5 and 21 and 23                                                                                                                                                                           | 525     |
| 25                                                   | Limit 24 to (English language and humans and yr="2009 -Current" and "all child (0 to 18 years)")                                                                                          | 482     |

2 \* Sign denotes for any character(s), SN= Serial number, mp=title, abstract, original title, name of  
 3 substance word, subject heading word, keyword heading word, protocol supplementary concept word,  
 4 rare disease supplementary concept word, unique identifier

5

1 Endnote (version X7.5) software was used for managing all the identified papers (n=1581).  
2 Duplicate papers (n= 287) were removed. The remaining papers (n=1294) were then  
3 screened by title. From this, irrelevant titles (n=845) were excluded. The abstract of the  
4 remaining papers (n= 449) were reviewed; and a further 385 papers were excluded. Full texts  
5 of the remaining papers (n=64) were retrieved and reviewed by the three researchers(SP, JJ  
6 and JL) against the inclusion/exclusion criteria, resulting in eight papers being included in  
7 this systematic review. The authors of this review paper were not blinded to the name,  
8 journal titles or institutional affiliation of the authors of the paper selected for the final  
9 review. This process of study selection has been presented using the PRISMA flow-diagram  
10 in Figure 1.

### 11 *Assessment of included papers*

12 A modified version of the checklist by Downs and Black (26) was used to assess the quality  
13 of studies and the risk of bias. Out of 27 suggested checklist items, relevant items (questions  
14 1-3, 6, 7, 10-12, 18, 20) were considered appropriate for this review. A score of '1' was  
15 allocated for 'Yes' and a score of '0' was allocated for 'No' and 'Unable to determine'. Out  
16 of a possible score of 10, a total score greater than 5 indicated a quality paper. Three  
17 researchers (SP, JJ and JL) independently carried out the appraisal using the checklist and the  
18 final quality score was ascertained by comparing each of their scores. Any discrepancies  
19 were re-assessed jointly and a consensus reached.

### 20 *Data extraction and management*

21 In order to maintain consistency and avoid bias, a data extraction table was developed.  
22 Information on study design, country of study, age-group of participants, sample size, main

1 outcome variables, correlates and measures of association was extracted. Mean duration of  
2 screen-viewing was also extracted whenever available. Adjusted Odds Ratio (AOR) and  
3 Standardised Coefficients (SC) were extracted in order to establish the correlates. Since there  
4 were few studies that assessed a particular variable, association and consistency could not be  
5 determined.

## 6 **RESULTS**

### 7 *Study characteristics*

8 Eight papers were selected for inclusion in the review and all were published between 2013  
9 and 2015. Six were published in 2015 (1, 27-31), one in 2014 (32) and 2013 (33). All of the  
10 eligible studies were conducted in high-income countries with three from the United States  
11 (1, 27, 31) and United Kingdom (28, 29, 33), one from Netherlands (30) and Hong Kong  
12 (32). All the eight studies were cross-sectional in design. The studies quality scores ranged  
13 from 6 to 9 with a mean score of 7.75.

14 The studies sample size ranged from n=202 to n=2326. Two studies reported using weighted  
15 data to be representative of the national population (1, 31), while all other studies used non-  
16 representative techniques(27-30, 32, 33). The mean age of participants was clearly stated in  
17 three papers (28, 30, 31) while the remaining four provided frequencies in different age-  
18 groups (27, 29, 32, 33). However, Connell et. al. (1) did not report children's mean age.  
19 Based on the data available from these seven papers, the mean age of children was (4.8 ± 1.4)  
20 years. The descriptive characteristics of the included studies are presented in Table 2.

### 21 *Screen time*

1 Six studies reported screen viewing as the primary outcome measure (28-33), while one  
2 study reported adherence to the American Academy of Paediatrics (AAP) guidelines on  
3 screen time (27) and other reported parent-child co-use of media (1).

4 Mobile screen media use in all eight studies was measured by parental self-report of their  
5 children's screen viewing behaviour. One study reported face validity, content validity and  
6 test-retest reliability of the instrument used to measure screen time (32) and three study  
7 questionnaires had been used in other studies (1, 27, 31). The other three studies stated  
8 parental-proxy reports to have reasonable reliability and validity to measure children's screen  
9 viewing behaviour (28, 29, 33). Whilst, Nikken and colleagues did not report on the  
10 reliability and validity of their instrument (30). Overall, the mean duration of screen-viewing  
11 could not be determined as only three studies reported the average duration of screen-  
12 viewing (27, 30, 31), while other studies categorised participants into screen times, such as  
13 less than 2 hours and more than 2 hours.

#### 14 *Device use and correlates*

15 In total, 29 correlates were studied in the eight papers. Of those, two variables (child age and  
16 parental media use) were reported five times, one variable (parental age) was reported three  
17 times, seven variables (child gender, parent's gender, family income, parental education,  
18 race/ethnicity, parental belief on positive effects of media and number of screens at home)  
19 were reported twice, and the remaining 19 variables were reported once (See table 3 and 4).  
20 Association and consistency of the variables could not be determined as a majority of the  
21 variables were studied in less than three studies.



1  
2  
3 1 Four studies reported an association specific to smart phones (1, 29, 31, 33), while three were  
4  
5 2 specific to electronic tablets (1, 28, 31). Nikken et. al. (30) reported combined results for  
6  
7 3 touchscreens (smartphones and tablets) while the other two studies reported correlates for  
8  
9 4 electronic media, that included both traditional and modern devices such as televisions,  
10  
11 5 computers, mobile phones and tablets (27, 32). Use of a PDA was not studied in any of the  
12  
13 6 papers.  
14  
15  
16  
17  
18  
19  
20

## 21 8 **Correlates of mobile media use**

### 22 9 *Child biological and demographic factors*

23  
24  
25  
26  
27 10 Three of the five studies (60%) reported a positive association between the child's age and  
28  
29 11 mobile screen media use (27, 31, 32) (Table 3). Older children (>3years) were more likely to  
30  
31 12 use smartphones, tablets or any media than younger children (<3 years) (27, 31, 32).  
32  
33 13 However, Lauricella et. al. examined parent-child co-use of smartphones and tablets and  
34  
35 14 reported an inverse association indicating that older children are less likely to co-use with  
36  
37 15 their parents (31). By way of contrast, Nikken et. al. (30) concluded that the child's age had  
38  
39 16 no significant association with the use of touchscreens. No association was found between  
40  
41 17 the use of smartphones, tablets or any other touchscreens and child's gender (1, 30) and body  
42  
43 18 mass index (BMI) (27).  
44  
45  
46  
47  
48  
49  
50  
51  
52  
53  
54  
55  
56  
57  
58  
59  
60

Table 2: Description of included studies

| S.N | Author                 | Year | Country     | Study design    | Sample size | Age group | Outcome measure                             | Screen studied                                                       | Independent variables                                                                                        | Quality score |
|-----|------------------------|------|-------------|-----------------|-------------|-----------|---------------------------------------------|----------------------------------------------------------------------|--------------------------------------------------------------------------------------------------------------|---------------|
| 1   | Nikken et al. (30)     | 2015 | Netherlands | Cross-sectional | 896         | 0-7 years | Media ownership and use                     | TV, game consoles, computers and touchscreens                        | Parent and child characteristics (age, access, concerns about media use)                                     | 6             |
| 2   | Lauricella et al. (31) | 2015 | US          | Cross-sectional | 2300        | 0-8 years | Children's screen time                      | Television, computers, smartphones, and tablets                      | Parental media use, parental attitudes, child's age                                                          | 8             |
| 3   | Connell et al. (1)     | 2015 | US          | Cross-sectional | 2326        | 0-8 years | Parent-child co-use of media                | Books, TV, computers, video games, tablets, and smartphones          | Parent's time with child, parent's media use, parental and child demographics                                | 7             |
| 4   | Kesten et al. (29)     | 2015 | UK          | Cross-sectional | 735         | 6-8 years | Children's screen-time                      | TV, computer, smartphone, game-console and multi-SV                  | Parent's employment, education, number and gender of children, screen related limits                         | 8             |
| 5   | Jago et al. (28)       | 2015 | UK          | Cross-sectional | 954         | 5-6 years | Children's screen-time                      | TV, computer/laptop use including tablets                            | Parenting styles and parental self-efficacy to limit screen time                                             | 8             |
| 6   | Asplund et al. (27)    | 2015 | US          | Cross-sectional | 314         | 0-5 years | Adherence to AAP guidelines for screen time | TV, video games, computers, cell phones and other electronic devices | Child BMI, child/parent demographics, and household media environment, parental attitudes towards TV viewing | 9             |
| 7   | Wu et al. (32)         | 2014 | Hong Kong   | Cross-sectional | 202         | 3-6 years | Use of digital products                     | Television, digital tablets, smart phones, etc                       | Participants' demographics, parenting approach (restrictive, instructive and co-using)                       | 8             |
| 8   | Jago et al. (33)       | 2013 | UK          | Cross-sectional | 750         | 6-8 years | Children's screen-time                      | TV, game console, smart-phone and multiscreen-viewing                | Parental media use, parental attitudes and access to media equipment                                         | 8             |

**Table 3: Demographic and biological correlates of mobile screen media use and direction of association**

| Variable type                                    | Variables                           | Smartphones       |              | Tablets       |             | Touchscreens |       | Any media device |          |
|--------------------------------------------------|-------------------------------------|-------------------|--------------|---------------|-------------|--------------|-------|------------------|----------|
|                                                  |                                     | Association       | Study        | Association   | Study       | Association  | Study | Association      | Study    |
| <b>Child biological and demographic factors</b>  | Child age                           | +                 | (31)         | +             | (31)        | 0            | (30)  | +                | (27, 32) |
|                                                  |                                     | -                 | (1) (co-use) | -             | (1)(co-use) |              |       |                  |          |
|                                                  | Child gender (0= boy)               | 0                 | (1)          | 0             | (1)         | 0            | (30)  |                  |          |
|                                                  | BMI                                 |                   |              |               |             |              |       | 0                | (27)     |
| <b>Family biological and demographic factors</b> | Parental age                        | 0                 | (1)          | 0             | (1)         |              |       | 0                | (27)     |
|                                                  |                                     |                   |              |               |             |              |       | -                | (32)     |
|                                                  | Parent's gender (0 = father)        | 0                 | (1)          | 0             | (1)         | 0            | (30)  |                  |          |
|                                                  | Family income                       |                   |              |               |             | +            | (30)  | -                | (32)     |
|                                                  | Parent's occupation (0= unemployed) |                   |              |               |             |              |       | -                | (32)     |
|                                                  | Parent's education                  | 0                 | (1)          | 0             | (1)         | 0            | (30)  |                  |          |
|                                                  | Language                            |                   |              |               |             |              |       | 0                | (27)     |
| Race/Ethnicity                                   | +                                   | (1)(Non-Hispanic) | +            | (1)(Hispanic) |             |              | 0     | (27)             |          |
| <b>Family structure factors</b>                  | Family size                         |                   |              |               |             | 0            | (30)  |                  |          |
|                                                  | Number of children in the family    |                   |              |               |             |              |       | +                | (32)     |

Note: '+' denotes Positive association, '-' denotes Negative association, '0' denotes No association (significant at 95% confidence level, p<0.05)

Empty cells denote that association for that variable has not been studied, '( )' denotes reference.

### 1 *Family biological and demographic factors*

2 Three studies reported an association between parental age and their children's mobile screen  
3 media use (1, 27, 32) (see Table 3). Of these, two reported no statistically significant  
4 association (1, 27), while Wu et. al. found a negative association, indicating that digital  
5 technologies were more frequently used by children with younger parents (32).

6 Mixed associations were found between family income and children's mobile screen media  
7 use (see Table 3). Nikken et. al. (30) reported a positive association, indicating that children  
8 from high-income families were using touchscreens longer than those from low-income  
9 families. On the other hand, Wu et. al. (32) found a negative association. The same study  
10 reported a negative association between parent's occupational status and children's mobile  
11 screen media use (32). Furthermore, children's of stay-at-home parents were using digital  
12 devices more frequently than children whose parents were engaged in an occupation (32).

13 No association was identified between young children's smartphone, tablet or any  
14 touchscreen use and parent's gender (1, 30). Similarly, parent's educational status (1, 30) and  
15 language (27) also did not show any significant association with children's mobile media use.

### 16 *Family structure factors*

17 Only two studies reported family factors associated with children's mobile screen media use  
18 (Table 3). There was a positive association reported between number of children and use of  
19 digital devices, such as televisions, computers, tablets and mobile phones (32), while when  
20 there were two or more children, they were more likely to use digital devices frequently for  
21 talking with friends compared to those families with one child (32).

22

1  
2  
3  
4  
5  
6  
7  
8  
9  
10  
11  
12  
13  
14  
15  
16  
17  
18  
19  
20  
21  
22  
23  
24  
25  
26  
27  
28  
29  
30  
31  
32  
33  
34  
35  
36  
37  
38  
39  
40  
41  
42  
43  
44  
45  
46  
47  
48  
49  
50  
51  
52  
53  
54  
55  
56  
57  
58  
59  
60

1 ***Behavioural factors***

2 Media skill was the only children's behavioural characteristic studied (see Table 4), with  
3 their ability or skill to use mobile screen media devices being positively associated with the  
4 frequency and duration of such devices used (30). Furthermore, children who were better  
5 skilled in using mobile screen media devices had greater access to these devices in their  
6 bedrooms and spent more time on them than less-skilled children (30).

7 ***Sociocultural/ environmental factors***

8 In total, 16 sociocultural/environmental correlates were investigated (see Table 4). Parental  
9 screen time/media use was the most studied variable (1, 27, 30, 31, 33). Two studies  
10 concluded that there was no statistically significant association between parental smartphone  
11 use and their children's use (1, 33). However, Lauricella et. al. found children (older than 2  
12 years) had higher levels of smartphone use if their parents spent more time using their  
13 smartphones (31). Positive associations have also been reported for parental screen time and  
14 children's use of tablets, touchscreen devices or any media (1, 27, 30, 31).

15 Parental attitudes about the effects of mobile screen media on children were positively  
16 associated with smartphone and tablet use for older young children (4-8 years) (31). The  
17 more positive parental attitudes towards the devices resulted in a greater use by the children  
18 (31). Similarly, parental belief in the negative effects of media on children and the belief that  
19 these mobile screen media devices were too complicated for their young children were not  
20 associated with children's use of these devices (30). However, children were more likely to  
21 use mobile screen media devices when parents believed that these devices were helpful as a

1  
2  
3 1 pacifier (30). On the other hand, parental nurturance and self-efficacy to limit screen-time  
4  
5  
6 2 were negatively associated with tablet use (28).  
7

8  
9 3 Keeping the television on during dinner time (27) and the presence of a computer outside  
10  
11 4 children's bedroom (32) were physical environmental correlates positively associated with  
12  
13 5 increased mobile screen media use among young children. The number of media devices at  
14  
15 6 home, and in the child's bedroom were also positively associated with increased smartphone  
16  
17 7 use (33). Jagoet. al. (33) concluded that the greater the number of devices, the greater the use,  
18  
19 8 while Asplund et. al. (27) reported no such association.  
20  
21  
22  
23  
24  
25  
26  
27  
28  
29  
30  
31  
32  
33  
34  
35  
36  
37  
38  
39  
40  
41  
42  
43  
44  
45  
46  
47  
48  
49  
50  
51  
52  
53  
54  
55  
56  
57  
58  
59  
60

9

**Table 4: Environmental and behavioural correlates of mobile screen media use and direction of association**

| Variable type                               | Variables                                                               | Smartphones |              | Tablets               |              | Touchscreens |       | Any media device |               |               |
|---------------------------------------------|-------------------------------------------------------------------------|-------------|--------------|-----------------------|--------------|--------------|-------|------------------|---------------|---------------|
|                                             |                                                                         | Assoc       | Study        | Assoc                 | Study        | Assoc        | Study | Assoc            | Study         |               |
| <b>Behavioural factors</b>                  | Child media skills                                                      |             |              |                       |              | +            | (30)  |                  |               |               |
| <b>Sociocultural/ environmental factors</b> | Parental media use/screen time                                          | +           | (31)(>2 yrs) | +                     | (1, 31)      | +            | (30)  | +                | (27) (≥2 yrs) |               |
|                                             |                                                                         | 0           | (1, 33)      |                       |              |              |       |                  |               |               |
|                                             | Parent attitudes on effects of media on children                        | +           | (31)(>6 yrs) | +                     | (31)(>2 yrs) |              |       |                  |               |               |
|                                             | Parental belief that media has positive effects on children             | 0           | (33)         |                       |              | 0            | (30)  |                  |               |               |
|                                             | Parental belief that media has negative effects on children             |             |              |                       |              | 0            | (30)  |                  |               |               |
|                                             | Parents belief on pacifying nature of media                             |             |              |                       |              | +            | (30)  |                  |               |               |
|                                             | Parents belief that media are too complicated for young children to use |             |              |                       |              | 0            | (30)  |                  |               |               |
|                                             | Parent’s time with child                                                | 0           | (1)          | 0                     | (1)          |              |       |                  |               |               |
|                                             | Parental limit setting on media use                                     |             | 0            | (29) (boys)           |              |              |       |                  |               |               |
|                                             |                                                                         |             | +            | (always) (29) (girls) |              |              |       |                  |               |               |
|                                             | Collaborative rule setting                                              | 0           | (29)         |                       |              |              |       |                  |               |               |
|                                             | Parental control on media use                                           |             |              | 0                     | (28)         |              |       |                  |               |               |
|                                             | Parental nurturance                                                     |             |              | -                     | (28)         |              |       |                  |               |               |
|                                             | Parental self-efficacy                                                  |             |              | -                     | (28)         |              |       |                  |               |               |
|                                             | TV on during dinner                                                     |             |              |                       |              |              |       |                  | +             | (27) (≥2 yrs) |
| Number of TVs/screens at home               | +                                                                       | (33)        |              |                       |              |              |       | 0                | (27)          |               |
| Computer’s outside bedroom                  |                                                                         |             |              |                       |              |              |       | +                | (32)          |               |
| Screen viewing items in child’s bedroom     | +                                                                       | (33)        |              |                       |              |              |       |                  |               |               |

Note: ‘+’ denotes Positive association, ‘-’ denotes Negative association, ‘0’ denotes No association (significant at 95% confidence level, p<0.050).

## 1 DISCUSSION

2 This systematic review summarised correlates of mobile screen media use among young  
3 children of eight years or less from eight studies. Previous reviews have focused on  
4 traditional fixed screen media, while reviews specifically focused on mobile screen media  
5 use among young children are limited. In this context, this systematic review of mobile  
6 screen media use among children (0-8 year), adds somewhat to the understanding of this  
7 area. Despite the review being conducted between 2009 to 2015, all the studies were  
8 published between 2013 and 2015, indicating limited but recent and increasing interest in  
9 this area.

10 This review found that older young children (4-8 years) were more likely to have higher  
11 mobile screen media use. Similarly, those who were better skilled in using such devices,  
12 had more access to media devices at home, and higher parental use of mobile screen  
13 media were more likely to have higher mobile screen media use. The bio-ecological  
14 model states that human behaviour is affected by intrapersonal factors, inter-personal  
15 factors and distal factors which interact to shape our behaviour (21, 34). However, the  
16 findings of this review support the fact that in the case of young children of eight years  
17 and less, distal factors such as parental behaviours and the home environment can be  
18 more influential in shaping their behaviour.

19 The majority of studies in this review reported a positive association between the child's  
20 age and their mobile screen media use. Older children (4-8 years) were more likely to use  
21 mobile screen media devices compared to their younger counterparts (0-3 years). This  
22 finding is consistent with a systematic review of traditional screen time among children  
23 under three years (17). Potential reasons for increased mobile screen media use with  
24 increasing age include: greater access/ownership of these devices; decreased parental



1 control and media use rules; and greater skills as a child ages (35, 36). Studies have found  
2 that parents tend to set more rules regarding screen time for younger children (35), with  
3 childhood screen time habits reflected in adolescence and adulthood (6), highlighting the  
4 importance of managing mobile screen media use with children. Higher mobile screen  
5 media use by older children in the family also has implications on the younger siblings.  
6 One of the studies in the review reported households with more than one child use digital  
7 devices more frequently (32). This could partly be the result of younger children  
8 observing and modelling the behaviour of older siblings. Of interest, role modelling either  
9 by parents or older siblings has been used effectively in other areas to influence children's  
10 behaviours (37, 38), and could be an important strategy to decrease young children's  
11 mobile media use

12 Mixed results in regards to parental age and children's mobile screen media use were  
13 reported. Two of the three studies found that children's mobile screen media use was not  
14 affected by parental age (1, 27), whereas another study reported higher use among  
15 children with younger parents (32). This may be due to greater mobile screen media use  
16 by young parents which would provide a supportive home environment for screen-  
17 viewing. Previous systematic reviews on traditional screens have reported an unclear  
18 association with parental age, which is consistent with this review (17-19).

19 Parents who used mobile media screens were more likely to have children who used these  
20 devices and for a longer time (1, 27, 30, 31). Furthermore, children of families who watch  
21 more TV are more likely to engage in higher screen-viewing (17, 19, 39-41). Therefore,  
22 children of parents with higher mobile screen media use may be more likely to have  
23 higher use due to parental modelling, thus being considered 'normal behaviour' (42).

1  
2  
3 1 Parent-child co-use of mobile screen media was highest for children less than two years  
4  
5 2 and decreased as the child aged (1). This may be due to younger children being less able  
6  
7 3 to manipulate technology or inability to unlock password protected devices and therefore  
8  
9 4 requiring parental support to operate the device. Furthermore, younger children may  
10  
11 5 spend more time at home with their parents, providing more opportunities for parent-child  
12  
13 6 co-use (1). It should be noted however, that decreased co-use with increasing age of  
14  
15 7 children minimises parents monitoring opportunities.  
16  
17

18  
19 8 Children who were more skilled at using mobile screen media devices were using these  
20  
21 9 devices for a longer time period than those who were less skilled (30). It can be posited  
22  
23 10 that, with increased exposure, it is possible children will gain even more skills over time,  
24  
25 11 ultimately leading to higher mobile screen media use as they age (35, 36). Increased  
26  
27 12 skills, and use with age may have both positive and negative impacts. For example, it may  
28  
29 13 put children at greater risk of exposure to inappropriate media content and in the absence  
30  
31 14 of parent-child co-use, these activities may go unnoticed by parents (43).  
32  
33

34  
35 15 Mixed associations were found for family income. Wu et. al. (32) found a negative  
36  
37 16 association for any media use which is consistent with a previous review with traditional  
38  
39 17 screen media(19), while Nikken et. al. concluded that children from higher-income  
40  
41 18 households had higher use of smartphones and tablets (30), which may be due to greater  
42  
43 19 ownership and access. On the other hand, a study on electronic media use (both fixed and  
44  
45 20 mobile screens) among children less than six years concluded no association between  
46  
47 21 family income and children's screen time (44).  
48  
49

50  
51 22 The review found, children of stay-at-home parents had higher mobile screen media use  
52  
53 23 (32). This suggests parents could be more engaged in screen-viewing, providing a  
54  
55 24 supportive environment for mobile screen media use. It should be noted self-reported data,  
56  
57  
58  
59  
60

1  
2  
3 1 from employed parents might under-report their children's media use. Other systematic  
4  
5 2 reviews focusing on children's traditional screen time report that parental occupation is  
6  
7 3 rarely studied, thus it is difficult to draw any specific conclusion (17, 18). This is an area  
8  
9  
10 4 worthy of future research, with parents working long hours or bringing their work home,  
11  
12 5 may minimise monitoring of children's screen habits.

13  
14 6 Use of mobile screen media devices was higher among children whose parents believed  
15  
16 7 in the pacifying effects of these devices. Parents are using these devices as babysitters to  
17  
18 8 secure free time or when busy with household chores or shopping (4, 11, 45). Parents may  
19  
20 9 not be aware that they are contributing to the development of their children's mobile  
21  
22 10 screen media use behaviours or the possible impacts that these devices and their  
23  
24 11 unmonitored use may have (46).

25  
26  
27  
28 12 Consistent with this review, previous systematic reviews, focusing on television viewing,  
29  
30 13 reported that child's gender is not associated with any particular screen-viewing  
31  
32 14 behaviour (17-19). Similarly, no association was found with parent's gender, potentially  
33  
34 15 because both parents were equally engaged with these mobile screen media as in case of  
35  
36 16 young boys and girls (47).

#### 37 38 39 40 17 ***Methodological limitations of studies reviewed***

41  
42  
43 18 Only two of the eight studies used a representative sample, the remaining studies relied on  
44  
45 19 non-representative techniques such as self-selected samples which could have introduced  
46  
47 20 elements of selection bias. A major limitation of the studies was the lack of objective  
48  
49 21 measure to assess children's media use. Parental proxy reports were used in all of the  
50  
51 22 studies included in the review. This approach may underestimate or overestimate true  
52  
53 23 exposure because of recall bias, social desirability bias or simply not being aware of  
54  
55 24 screen viewing (6). Furthermore, often studies included mobile screen media use as an  
56  
57  
58  
59  
60

1  
2  
3 1 average of weekdays and weekend days while others focused only on weekdays. There  
4  
5 2 can be broad variations in the duration of mobile screen media use during the week and  
6  
7 3 weekend days and there can be differential effect of correlates. In addition, only one study  
8  
9 4 tested reliability and validity of their instrument(32)while others either relied on  
10  
11 5 previously used questionnaires with unknown validity/reliability estimates.

12  
13  
14 6 Altogether, 29 correlates were examined in the eight papers. However, the vast majority  
15  
16 7 (19 variables) were examined only once. Even for variables such as a child's age and  
17  
18 8 parental media use which were studied more frequently, findings were disaggregated  
19  
20 9 across different media types making it difficult to reach an overall  
21  
22 10 conclusion.Heterogeneity of the studies limited carrying out meta-analysis.

## 23 24 25 26 11 **CONCLUSION**

27  
28  
29 12 This review has identified limited research undertaken on young children's mobile screen  
30  
31 13 media use,despite the rapid growth in mobile screen media device use.The review found  
32  
33 14 that correlates such as child's age and media skills, parental media use and access to  
34  
35 15 media devices at home appear to impact on determining the mobile screen media use by  
36  
37 16 children aged eight years and less. Future studies using valid and reliable objective  
38  
39 17 measures to assess children's mobile screen media use and frequent examination of the  
40  
41 18 potential correlates across multiple studies and settings are required. There is a need for  
42  
43 19 research to be undertaken in mobile screen media use across weekdays and weekend days  
44  
45 20 to establish a precise estimate of the time spent by these young children on mobile screen  
46  
47 21 media; the impact of parental behaviours on child's mobile screen media use; parental  
48  
49 22 rules on mobile screen media use and the impact on children; use of mobile screen  
50  
51 23 devices as pacifiers and its impact; parents and older siblings as role models; and parental  
52  
53 24 self-efficacy to influence children's behaviours.

1  
2  
3 1  
4  
5  
6 2  
7  
8 3  
9  
10  
11  
12  
13  
14  
15  
16  
17  
18  
19  
20  
21  
22  
23  
24  
25  
26  
27  
28  
29  
30  
31  
32  
33  
34  
35  
36  
37  
38  
39  
40  
41  
42  
43  
44  
45  
46  
47  
48  
49  
50  
51  
52  
53  
54  
55  
56  
57  
58  
59  
60

For peer review only

1  
2  
3 **1 List of abbreviations used**  
4

5  
6 2 PDA: Personal Digital Assistants  
7

8  
9 3 PRISMA: Preferred Reporting Items for Systematic Reviews and Meta-analyses  
10

11 **4 Declarations:**  
12

13  
14 **5 Ethics approval and consent to participate**  
15

16  
17 6 Since this systematic review uses already published, de-identified data, it is hence exempt  
18  
19 7 from the ethics approval process. It does not involve any contact with the human  
20  
21 8 participants and has not collected any primary data.  
22  
23

24 **9 Consent for publication**  
25

26  
27 10 This is “Not applicable” for this study as it does not report any individual level data.  
28  
29

30 **11 Availability of data and material**  
31

32  
33 12 The findings of this review rely on the data presented on the papers that are already  
34  
35 13 published and are easily accessible on public domains.  
36  
37

38 **14 Competing interests**  
39

40  
41 15 The authors declare that they have no financial and non-financial competing interests.  
42  
43

44 **16 Funding**  
45

46  
47 17 This study has not received any funding from any source.  
48  
49

50 **18 Author’s contribution**  
51

52  
53 19 SP, JL and JJ jointly conceived and designed the study. SP was responsible for searching  
54  
55 20 the literature, screening the papers, working on design, critically reviewing the papers and  
56  
57 21 drafting the manuscript. JJ provided overall supervision for the study, finalised  
58  
59  
60

1 methodology, screening of full text, quality assessment, and edited the manuscript. NS  
2 was involved in searching the database, initial screening of title and abstracts and revised  
3 the manuscript. JL contributed to design, screening of full text, quality assessment, and  
4 organised and revised the manuscript. All authors have read and approved the final  
5 version of manuscript.

#### 6 **Acknowledgements**

7 We would like to acknowledge the support of Public health faculty librarian of Curtin  
8 University, Ms. Diana Blackwood for her guidance during the database searching stage.

#### 9 **Author's information**

10 Susan Paudel(BPH, MPH, MHIthProm): School of Public Health, Curtin University,  
11 Western Australia, Email: [replysusan@gmail.com](mailto:replysusan@gmail.com)

12 Dr.JonineJancey ( BSc (Hons) PhD) : Associate Professor, Collaboration for Evidence,  
13 Research and Impact in Public Health (CERIPH), School of Public Health, Curtin  
14 University, Email: [j.jancey@curtin.edu.au](mailto:j.jancey@curtin.edu.au)

15 Narayan Subedi (BPH, MPH, PGDPHN): Assistant Professor, Department of Community  
16 Medicine and Public Health, Maharajgunj Medical Campus, Institute of Medicine,  
17 Tribhuvan University, Nepal, Email: [subedi.narayan@gmail.com](mailto:subedi.narayan@gmail.com)

18 Dr. Justine Leavy (BSc, MPH, PhD): Senior Lecturer, Collaboration for Evidence,  
19 Research and Impact in Public Health (CERIPH), School of Public Health, Curtin  
20 University, Email: [j.leavy@curtin.edu.au](mailto:j.leavy@curtin.edu.au)

21

## 1 References

- 2 1. Connell SL, Lauricella AR, Wartella E. Parental Co-Use of Media Technology with their  
3 Young Children in the USA. *Journal of Children and Media*. 2015;9(1):5-21.
- 4 2. Holloway D, Green L, Livingstone S. Zero to eight: Young children and their internet use.  
5 London: LSE, EU Kids Online; 2013.
- 6 3. Rideout V. Zero to eight: Children's media use in America 2013. United States of  
7 America: Common Sense Media, 2013.
- 8 4. Kabali HK, Irigoyen MM, Nunez-Davis R, Budacki JG, Mohanty SH, Leister KP, et al.  
9 Exposure and use of mobile media devices by young children. *Pediatrics*. 2015:2015-151.
- 10 5. Houghton S, Hunter SC, Rosenberg M, Wood L, Zadow C, Martin K, et al. Virtually  
11 impossible: limiting Australian children and adolescents daily screen based media use. *BMC*  
12 *Public Health*. 2015;15(1):1.
- 13 6. Downing KL, Hnatiuk J, Hesketh KD. Prevalence of sedentary behavior in children under  
14 2years: A systematic review. *Preventive Medicine*. 2015;78:105-14.
- 15 7. Strasburger V., Hogan M. Policy Statement: children, adolescents and the media.  
16 *Pediatrics*. 2013;132:958-61.
- 17 8. Department of Health. Australia's Physical Activity and Sedentary Behaviour Guidelines:  
18 Australian Government; 2015 [Available from:  
19 [http://www.health.gov.au/internet/main/publishing.nsf/content/health-pubhlth-strateg-phys-](http://www.health.gov.au/internet/main/publishing.nsf/content/health-pubhlth-strateg-phys-act-guidelines#npa05)  
20 [act-guidelines#npa05](http://www.health.gov.au/internet/main/publishing.nsf/content/health-pubhlth-strateg-phys-act-guidelines#npa05).
- 21 9. Mackay M. M. Australian Mobile Phone Lifestyle Index: Mobile Phone Use Compared To  
22 The Tablet And Personal Computer. Australia: AIMIA, 2014.
- 23 10. Australian Bureau of Statistics (ABS). Australian Health survey: Physical Activity, 2011-12.  
24 Canberra: Australian Bureau of Statistics, 2013.
- 25 11. Radesky JS, Peacock-Chambers E, Zuckerman B, Silverstein M. Use of Mobile Technology  
26 to Calm Upset Children: Associations With Social-Emotional Development. *JAMA Pediatrics*.  
27 2016;170(4):397-9.
- 28 12. Hinkley T, Verbestel V, Ahrens W, Lissner L, Molnár D, Moreno LA, et al. Early childhood  
29 electronic media use as a predictor of poorer well-being: a prospective cohort study. *JAMA*  
30 *Pediatrics*. 2014;168(5):485-92.
- 31 13. Epstein LH, Roemmich JN, Robinson JL, Paluch RA, Winiewicz DD, Fuerch JH, et al. A  
32 randomized trial of the effects of reducing television viewing and computer use on body mass  
33 index in young children. *Arch Pediatr Adolesc Med*. 2008;162(3):239-45.
- 34 14. Pagani LS, Fitzpatrick C, Barnett TA, Dubow E. Prospective associations between early  
35 childhood television exposure and academic, psychosocial, and physical well-being by middle  
36 childhood. *Arch Pediatr Adolesc Med*. 2010;164(5):425-31.
- 37 15. Ross ST, Dowda M, Saunders RP, Pate RR. Double dose: The cumulative effect of TV  
38 viewing at home and in preschool on children's activity patterns and weight status. *Pediatr Exerc*  
39 *Sci*. 2013;25(2):262.
- 40 16. Radesky JS, Schumacher J, Zuckerman B. Mobile and interactive media use by young  
41 children: the good, the bad, and the unknown. *Pediatrics*. 2015;135(1):1-3.
- 42 17. Duch H, Fisher EM, Ensari I, Harrington A. Screen time use in children under 3 years old:  
43 a systematic review of correlates. *Int J Behav Nutr Phys Act*. 2013;10(1):1-10.
- 44 18. Hinkley T, Salmon J, Okely AD, Trost SG. Correlates of sedentary behaviours in preschool  
45 children: a review. *Int J Behav Nutr Phys Act*. 2010;7(66):10.
- 46 19. Cillero IH, Jago R. Systematic review of correlates of screen-viewing among young  
47 children. *Preventive Medicine*. 2010;51(1):3-10.
- 48 20. Vanderloo LM. Screen-viewing among preschoolers in childcare: A systematic review.  
49 *BMC Pediatr*. 2014;14(1):205.



- 1 21. Lawman HG, Wilson DK. A review of family and environmental correlates of health  
2 behaviors in high-risk youth. *Obesity (Silver Spring)*. 2012;20(6):1142-57.
- 3 22. Paudel S, Leavy J, Jancey J. Correlates of mobile screen media use among children aged  
4 0–8: protocol for a systematic review. *Systematic reviews*. 2016;5(1):1.
- 5 23. Moher D, Liberati A, Tetzlaff J, Altman DG, Group P. Preferred reporting items for  
6 systematic reviews and meta-analyses: the PRISMA statement. *International Journal of Surgery*.  
7 2010;8(5):336-41.
- 8 24. Knobloch K, Yoon U, Vogt PM. Preferred reporting items for systematic reviews and  
9 meta-analyses (PRISMA) statement and publication bias. *Journal of Cranio-Maxillofacial Surgery*.  
10 2011;39(2):91-2.
- 11 25. Liberati A, Altman DG, Tetzlaff J, Mulrow C, Gøtzsche PC, Ioannidis JPA, et al. The  
12 PRISMA statement for reporting systematic reviews and meta-analyses of studies that evaluate  
13 health care interventions: explanation and elaboration. *Journal of Clinical Epidemiology*.  
14 2009;62(10):e1-e34.
- 15 26. Downs SH, Black N. The feasibility of creating a checklist for the assessment of the  
16 methodological quality both of randomised and non-randomised studies of health care  
17 interventions. *Journal of Epidemiology and Community Health*. 1998;52(6):377-84.
- 18 27. Asplund KM, Kair LR, Arain YH, Cervantes M, Oreskovic NM, Zuckerman KE. Early  
19 childhood screen time and parental attitudes toward child television viewing in a low-income  
20 latino population attending the special supplemental nutrition program for women, infants, and  
21 children. *Child*. 2015;11(5):590-9.
- 22 28. Jago R, Wood L, Zahra J, Thompson JL, Sebire SJ. Parental control, nurturance, self-  
23 efficacy, and screen viewing among 5-to 6-year-old children: a cross-sectional mediation analysis  
24 to inform potential behavior change strategies. *Child*. 2015;11(2):139-47.
- 25 29. Kesten JM, Sebire SJ, Turner KM, Stewart-Brown S, Bentley G, Jago R. Associations  
26 between rule-based parenting practices and child screen viewing: a cross-sectional study.  
27 *Preventive Medicine Reports*. 2015;2:84-9.
- 28 30. Nikken P, Schols M. How and Why Parents Guide the Media Use of Young Children.  
29 *Journal of Child and Family Studies*. 2015;24(11):3423-35.
- 30 31. Lauricella AR, Wartella E, Rideout VJ. Young children's screen time: The complex role of  
31 parent and child factors. *Journal of Applied Developmental Psychology*. 2015;36:11-7.
- 32 32. Wu CST, Fowler C, Lam WYY, Wong HT, Wong CHM, Loke AY. Parenting approaches and  
33 digital technology use of preschool age children in a Chinese community. *Ital*. 2014;40(1):1-8.
- 34 33. Jago R, Sebire SJ, Lucas PJ, Turner KM, Bentley GF, Goodred JK, et al. Parental modelling,  
35 media equipment and screen-viewing among young children: Cross-sectional study. *BMJ Open*.  
36 2013;3(4).
- 37 34. Bronfenbrenner U, Evans GW. Developmental Science in the 21st Century: Emerging  
38 Questions, Theoretical Models, Research Designs and Empirical Findings. *Social Development*.  
39 2000;9(1):115-25.
- 40 35. Warren R. Parental mediation of preschool children's television viewing. *J Broadcast*  
41 *Electron Media*. 2003;47(3):394-417.
- 42 36. Australian Communications and Media Authority (ACMA). Access to the internet,  
43 broadband and mobile phones in family households. Australia: 2008.
- 44 37. Brown R, Ogden J. Children's eating attitudes and behaviour: a study of the modelling  
45 and control theories of parental influence. *Health Educ Res*. 2004;19(3):261-71.
- 46 38. Draxten M, Fulkerson JA, Friend S, Flattum CF, Schow R. Parental role modeling of fruits  
47 and vegetables at meals and snacks is associated with children's adequate consumption.  
48 *Appetite*. 2014;78:1-7.
- 49 39. Xu H, Wen LM, Rissel C. Associations of parental influences with physical activity and  
50 screen time among young children: a systematic review. *J Obes*. 2015;2015.

- 1  
2  
3 1 40. Birken CS, Maguire J, Mekky M, Manhiot C, Beck CE, Jacobson S, et al. Parental factors  
4 2 associated with screen time in pre-school children in primary-care practice: a TARGet Kids!  
5 3 study. *Public Health Nutrition*. 2011;14(12):2134-38.  
6 4  
7 41. Jago R, Thompson JL, Sebire SJ, Wood L, Pool L, Zahra J, et al. Cross-sectional  
8 5 associations between the screen-time of parents and young children: differences by parent and  
9 6 child gender and day of the week. *Int J Behav Nutr Phys Act*. 2014;11(1):54-64.  
10 7  
11 42. Schoeppe S, Rebar AL, Short CE, Alley S, Van Lippevelde W, Vandelanotte C. How is  
12 8 adults' screen time behaviour influencing their views on screen time restrictions for children? A  
13 9 cross-sectional study. *BMC Public Health*. 2016;16(1):201.  
14 10  
15 43. Ey LA., Culpit C.G. Exploring young children's understanding of risks associated with  
16 11 Internet usage and their concepts of mangement strategies. *Journal of Early Childhood Research*.  
17 12 2011;9:53-65.  
18 13  
19 44. Vandewater EA, Rideout VJ, Wartella EA, Huang X, Lee JH, Shim M-s. Digital childhood:  
20 14 electronic media and technology use among infants, toddlers, and preschoolers. *Pediatrics*.  
21 15 2007;119(5):e1006-15.  
22 16  
23 45. Chiong C., Shuler C. Learning: Is there an app for that? Investigations of young children's  
24 17 usage and learning with mobile devices and apps. Sesame Workshop; The Joan Ganz Cooney  
25 18 Centre, New York 2010.  
26 19  
27 46. Kim J-K, Kang Y-S. The Effects of Young Children's Smartphone Use Experience on Their  
28 20 Parents' Perceptions and Needs and Their Self-Regulation. *International Journal of Applied*  
29 21 *Engineering Research*. 2016;11(2):1208-11.  
30 22  
31 47. Hinkley T, Salmon J, Okely AD, Crawford D, Hesketh K. Preschoolers' physical activity,  
32 23 screen time, and compliance with recommendations. *Medicine and Science in Sports and*  
33 24 *Exercise*. 2012;44(3):458-65.  
34  
35  
36  
37  
38  
39  
40  
41  
42  
43  
44  
45  
46  
47  
48  
49  
50  
51  
52  
53  
54  
55  
56  
57  
58  
59  
60

1  
2  
3  
4  
5  
6  
7  
8  
9  
10  
11  
12  
13  
14  
15  
16  
17  
18  
19  
20  
21  
22  
23  
24  
25  
26  
27  
28  
29  
30  
31  
32  
33  
34  
35  
36  
37  
38  
39  
40  
41  
42  
43  
44  
45  
46  
47  
48  
49  
50  
51  
52  
53  
54  
55  
56  
57  
58  
59  
60

1 Figure 1: PRISMA flow chart for study selection

2

3

For peer review only

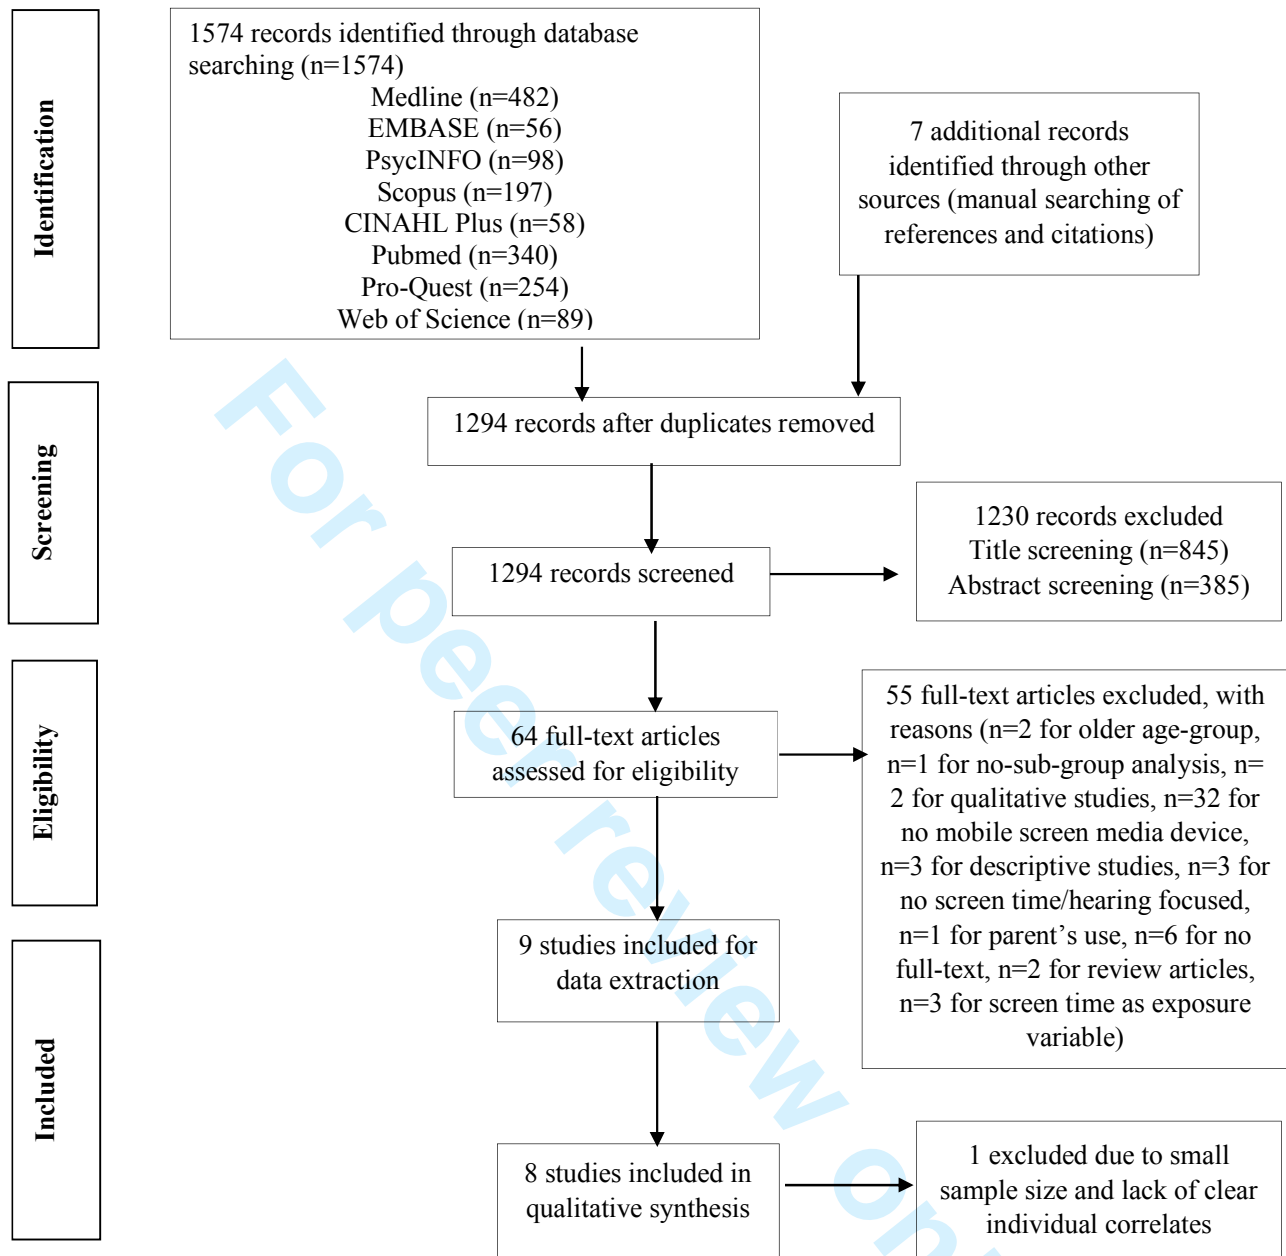

Figure 1: PRISMA flow chart for study selection

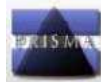

# PRISMA 2009 Checklist

| Section/topic                      | #  | Checklist item                                                                                                                                                                                                                                                                                              | Reported on page # |
|------------------------------------|----|-------------------------------------------------------------------------------------------------------------------------------------------------------------------------------------------------------------------------------------------------------------------------------------------------------------|--------------------|
| <b>TITLE</b>                       |    |                                                                                                                                                                                                                                                                                                             |                    |
| Title                              | 1  | Identify the report as a systematic review, meta-analysis, or both.                                                                                                                                                                                                                                         | 1                  |
| <b>ABSTRACT</b>                    |    |                                                                                                                                                                                                                                                                                                             |                    |
| Structured summary                 | 2  | Provide a structured summary including, as applicable: background; objectives; data sources; study eligibility criteria, participants, and interventions; study appraisal and synthesis methods; results; limitations; conclusions and implications of key findings; systematic review registration number. | 3,4                |
| <b>INTRODUCTION</b>                |    |                                                                                                                                                                                                                                                                                                             |                    |
| Rationale                          | 3  | Describe the rationale for the review in the context of what is already known.                                                                                                                                                                                                                              | 6,7                |
| Objectives                         | 4  | Provide an explicit statement of questions being addressed with reference to participants, interventions, comparisons, outcomes, and study design (PICOS).                                                                                                                                                  | 7,8                |
| <b>METHODS</b>                     |    |                                                                                                                                                                                                                                                                                                             |                    |
| Protocol and registration          | 5  | Indicate if a review protocol exists, if and where it can be accessed (e.g., Web address), and, if available, provide registration information including registration number.                                                                                                                               | 8                  |
| Eligibility criteria               | 6  | Specify study characteristics (e.g., PICOS, length of follow-up) and report characteristics (e.g., years considered, language, publication status) used as criteria for eligibility, giving rationale.                                                                                                      | 9                  |
| Information sources                | 7  | Describe all information sources (e.g., databases with dates of coverage, contact with study authors to identify additional studies) in the search and date last searched.                                                                                                                                  | 10                 |
| Search                             | 8  | Present full electronic search strategy for at least one database, including any limits used, such that it could be repeated.                                                                                                                                                                               | 10,11              |
| Study selection                    | 9  | State the process for selecting studies (i.e., screening, eligibility, included in systematic review, and, if applicable, included in the meta-analysis).                                                                                                                                                   | 10                 |
| Data collection process            | 10 | Describe method of data extraction from reports (e.g., piloted forms, independently, in duplicate) and any processes for obtaining and confirming data from investigators.                                                                                                                                  | 10,11              |
| Data items                         | 11 | List and define all variables for which data were sought (e.g., PICOS, funding sources) and any assumptions and simplifications made.                                                                                                                                                                       | 7,8                |
| Risk of bias in individual studies | 12 | Describe methods used for assessing risk of bias of individual studies (including specification of whether this was done at the study or outcome level), and how this information is to be used in any data synthesis.                                                                                      | 12                 |
| Summary measures                   | 13 | State the principal summary measures (e.g., risk ratio, difference in means).                                                                                                                                                                                                                               | 7                  |
| Synthesis of results               | 14 | Describe the methods of handling data and combining results of studies, if done, including measures of consistency (e.g., $I^2$ ) for each meta-analysis.                                                                                                                                                   | 12,13              |

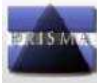

# PRISMA 2009 Checklist

| Section/topic                 | #  | Checklist item                                                                                                                                                                                           | Reported on page # |
|-------------------------------|----|----------------------------------------------------------------------------------------------------------------------------------------------------------------------------------------------------------|--------------------|
| Risk of bias across studies   | 15 | Specify any assessment of risk of bias that may affect the cumulative evidence (e.g., publication bias, selective reporting within studies).                                                             | 12                 |
| Additional analyses           | 16 | Describe methods of additional analyses (e.g., sensitivity or subgroup analyses, meta-regression), if done, indicating which were pre-specified.                                                         | 12,13              |
| <b>RESULTS</b>                |    |                                                                                                                                                                                                          |                    |
| Study selection               | 17 | Give numbers of studies screened, assessed for eligibility, and included in the review, with reasons for exclusions at each stage, ideally with a flow diagram.                                          | 13                 |
| Study characteristics         | 18 | For each study, present characteristics for which data were extracted (e.g., study size, PICOS, follow-up period) and provide the citations.                                                             | 13                 |
| Risk of bias within studies   | 19 | Present data on risk of bias of each study and, if available, any outcome level assessment (see item 12).                                                                                                | 13                 |
| Results of individual studies | 20 | For all outcomes considered (benefits or harms), present, for each study: (a) simple summary data for each intervention group (b) effect estimates and confidence intervals, ideally with a forest plot. | 13-21              |
| Synthesis of results          | 21 | Present results of each meta-analysis done, including confidence intervals and measures of consistency.                                                                                                  |                    |
| Risk of bias across studies   | 22 | Present results of any assessment of risk of bias across studies (see Item 15).                                                                                                                          |                    |
| Additional analysis           | 23 | Give results of additional analyses, if done (e.g., sensitivity or subgroup analyses, meta-regression [see Item 16]).                                                                                    |                    |
| <b>DISCUSSION</b>             |    |                                                                                                                                                                                                          |                    |
| Summary of evidence           | 24 | Summarize the main findings including the strength of evidence for each main outcome; consider their relevance to key groups (e.g., healthcare providers, users, and policy makers).                     | 22-25              |
| Limitations                   | 25 | Discuss limitations at study and outcome level (e.g., risk of bias), and at review-level (e.g., incomplete retrieval of identified research, reporting bias).                                            | 25-26              |
| Conclusions                   | 26 | Provide a general interpretation of the results in the context of other evidence, and implications for future research.                                                                                  | 26                 |
| <b>FUNDING</b>                |    |                                                                                                                                                                                                          |                    |
| Funding                       | 27 | Describe sources of funding for the systematic review and other support (e.g., supply of data); role of funders for the systematic review.                                                               |                    |

From: Moher D, Liberati A, Tetzlaff J, Altman DG, The PRISMA Group (2009). Preferred Reporting Items for Systematic Reviews and Meta-Analyses: The PRISMA Statement. PLoS Med 6(6): e1000097. doi:10.1371/journal.pmed1000097

For more information, visit: [www.prisma-statement.org](http://www.prisma-statement.org).

# BMJ Open

## Correlates of mobile screen media use among children aged 0-8: a systematic review

|                                 |                                                                                                                                                                                                                                                                                                                                                                                                                                                              |
|---------------------------------|--------------------------------------------------------------------------------------------------------------------------------------------------------------------------------------------------------------------------------------------------------------------------------------------------------------------------------------------------------------------------------------------------------------------------------------------------------------|
| Journal:                        | <i>BMJ Open</i>                                                                                                                                                                                                                                                                                                                                                                                                                                              |
| Manuscript ID                   | bmjopen-2016-014585.R1                                                                                                                                                                                                                                                                                                                                                                                                                                       |
| Article Type:                   | Research                                                                                                                                                                                                                                                                                                                                                                                                                                                     |
| Date Submitted by the Author:   | 13-Apr-2017                                                                                                                                                                                                                                                                                                                                                                                                                                                  |
| Complete List of Authors:       | Paudel, Susan; Curtin University School of Public Health, Jancey, Jonine; Curtin University, Collaboration for Evidence, Research and Impact in Public Health (CERIPH), School of Public Health Subedi, Narayan; Maharajgunj Medical Campus, Institute of Medicine, Department of Community Medicine and Public Health Leavy, Justine; Curtin University, Collaboration for Evidence, Research and Impact in Public Health (CERIPH), School of Public Health |
| <b>Primary Subject Heading</b>: | Public health                                                                                                                                                                                                                                                                                                                                                                                                                                                |
| Secondary Subject Heading:      | Epidemiology, Research methods                                                                                                                                                                                                                                                                                                                                                                                                                               |
| Keywords:                       | Children, Mobile media use, Screen time, Correlates, Systematic review                                                                                                                                                                                                                                                                                                                                                                                       |
|                                 |                                                                                                                                                                                                                                                                                                                                                                                                                                                              |

SCHOLARONE™  
Manuscripts

1  
2  
3 **Title: Correlates of mobile screen media use among children aged 0-8:**  
4 **a systematic review**  
5  
6  
7

8 Authors:

9  
10 Susan Paudel

11  
12 School of Public Health, Curtin University, Western Australia

13 [replysusan@gmail.com](mailto:replysusan@gmail.com)  
14  
15  
16  
17  
18  
19

20 Dr. Jonine Jancey

21 Collaboration for Evidence, Research and Impact in Public Health (CERIPH), School of

22 Public Health, Curtin University, Western Australia  
23  
24

25 [j.jancey@curtin.edu.au](mailto:j.jancey@curtin.edu.au)  
26  
27  
28  
29  
30

31 Narayan Subedi

32 Department of Community Medicine and Public Health, Maharajgunj Medical Campus,

33 Institute of Medicine, Tribhuvan University  
34  
35

36 [subedi.narayan@gmail.com](mailto:subedi.narayan@gmail.com)  
37  
38  
39  
40  
41

42 Dr. Justine Leavy

43 Collaboration for Evidence, Research and Impact in Public Health (CERIPH), School of

44 Public Health, Curtin University, Western Australia  
45  
46

47 [j.leavy@curtin.edu.au](mailto:j.leavy@curtin.edu.au)  
48  
49  
50  
51  
52  
53  
54  
55  
56  
57  
58  
59  
60



1  
2  
3 **Corresponding author:**  
4

5 Susan Paudel  
6

7 School of Public Health, Curtin University, Western Australia  
8

9  
10 Email: [replysusan@gmail.com](mailto:replysusan@gmail.com)  
11

12 Contact no: 977-9843061616  
13  
14  
15  
16  
17  
18  
19  
20  
21  
22  
23  
24  
25  
26  
27  
28  
29  
30  
31  
32  
33  
34  
35  
36  
37  
38  
39  
40  
41  
42  
43  
44  
45  
46  
47  
48  
49  
50  
51  
52  
53  
54  
55  
56  
57  
58  
59  
60

For peer review only

**Abstract****Background**

Young children (0-8years) are increasingly exposed to mobile screen media devices such as smartphones and electronic tablets. Furthermore, the mobile screen devices are replacing traditional fixed screen devices such as television and desktop computers. This study is a systematic review of the peer-reviewed literature to identify the correlates of mobile screen media use among children aged eight years and less.

**Methods**

Eight electronic databases were searched for relevant peer-reviewed English language primary research articles published or in press between January 2009 and March 2017. The systematic review was guided by PRISMA criteria and registered with PROSPERO. A manual search of reference lists and citation was also carried out for potential papers.

**Results**

Thirteen studies meeting the inclusion criteria were identified of which a total of 36 correlates were examined. Older children, children better skilled in using mobile screen media devices, those having greater access to such devices at home and whose parents had high mobile screen media use were more likely to have higher use of mobile screen media devices. No association existed with parent's age, sex and education.

**Conclusion**

Limited research has been undertaken into young children's mobile screen media use and most of the variables have been studied too infrequently for robust conclusions to be reached. Future studies with objective assessment of mobile screen media use and frequent examination of the potential correlates across multiple studies and settings are recommended.

1  
2  
3 **Review registration:** This review is registered with PROSPERO International Prospective  
4 Register of Ongoing Systematic Reviews (registration number: CRD42015028028).  
5  
6  
7

### 8 **Keywords**

9  
10 Children, mobile screen media, screen time, correlates, systematic review  
11  
12

### 13 **Strengths**

- 14  
15 • This review summarises current peer-reviewed literature on correlates of mobile  
16 screen media use among children aged eight years and less.  
17
- 18 • The review used a robust research strategy underpinned by a published protocol,  
19 identified up-to-date key words with the assistance of public health librarian; searched  
20 eight databases based on a comprehensive selection criterion.  
21
- 22 • It has summarised the findings, gaps and limitation of the literature and highlighted  
23 areas for future research.  
24  
25  
26  
27  
28  
29  
30  
31

### 32 **Limitations**

- 33  
34 • All the reviewed studies were cross-sectional in design.  
35
- 36 • Association and consistency could not be determined in this review because the study  
37 findings were segregated across different mobile screen media types and hence the  
38 findings are largely descriptive.  
39  
40  
41  
42  
43  
44  
45  
46  
47  
48  
49  
50  
51  
52  
53  
54  
55  
56  
57  
58  
59  
60

## BACKGROUND

Young children are increasingly exposed to multiple screens including both the traditional fixed screens, such as televisions and desktop computers and newer handheld mobile screen media devices such as smartphones and electronic tablets (1). Specifically, there has been a rapid uptake of mobile screen media devices in recent years, among young children (2, 3). This is largely facilitated by the characteristics of handheld devices, their portability, screen size, decreasing cost, multiple applications and interactive ability (4, 5). Because of the increasing uptake and use of mobile screen media devices, the daily screen time of traditional media such as television has decreased while the time spent on the former has drastically increased (4). This increasing exposure and accessibility to mobile screen media devices has public health implications, for children's sedentary behaviour and play opportunities, especially considering the evidence that indicates childhood habits usually track into adulthood (6). Furthermore, the pleasure a child derives from interacting with these touchscreens may lead to increased and habitual use (7). Nevertheless, there are benefits associated with interactive mobile screen media devices use, such as learning opportunities and face-to face connections with distant family and friends (8, 9).

Health guidelines recommend that children aged less than two should be exposed to a limited amount of educational mobile screen media use, while for those aged two-to-five, the daily screen time should be less than one hour (8, 10-12). However, worldwide a significant proportion of young children are exceeding the recommended exposure time (5). For example, in an urban community in Philadelphia, USA, nearly half of one-year-old children were reportedly using mobile screen media devices on a daily basis, with use increasing with age (4). Surprisingly, 75% of children had their own mobile device by the age of four (4). It seems parents are increasingly allowing their young children to use mobile screen media devices, especially smartphones and electronic tablets, to keep them occupied when they are

1  
2  
3 doing household chores or shopping, to calm children in public places and to put children to  
4  
5 sleep (3, 4, 13).  
6

7  
8 Despite the increase in the use of mobile screen media devices such as smartphones,  
9  
10 electronic tablets, handheld computers and Personal Digital Assistants (PDAs) by young  
11  
12 children, very limited research has been carried out to identify the correlates associated with  
13  
14 their increased use (4). Currently, screen time research is dominated by fixed screens with  
15  
16 scant attention paid to mobile screen media devices (8). Systematic reviews to identify the  
17  
18 correlates of mobile screen media use among young children are almost non-existent with  
19  
20 previous reviews focussing on sedentary behaviours or television viewing (14-16).  
21  
22

23  
24 Considering the increasing availability, ownership and use of mobile screen media devices  
25  
26 (smartphones, electronic tablets, handheld computers, personal digital assistants (PDAs))  
27  
28 among young children, identification of the correlates of mobile screen media use specific to  
29  
30 children eight years and less is crucial. The purpose of this review was to systematically  
31  
32 search and critically review the published peer-reviewed literature to identify the correlates of  
33  
34 mobile screen media use among children eight years and less. Correlates are classified into  
35  
36 proximal and distal factors using a bio-ecological model to facilitate comparison with the  
37  
38 existing literature (14, 17). The model provides a strong theoretical basis to understand  
39  
40 human behaviour (18) and has been described in detail elsewhere (19).  
41  
42  
43  
44

## 45 **METHODS**

46  
47 This systematic review is based on Preferred Reporting Items for Systematic Reviews and  
48  
49 Meta-analyses (PRISMA) statement (20-22) and is registered with PROSPERO International  
50  
51 Prospective Register of Ongoing Systematic Reviews (registration number:  
52  
53 CRD42015028028). The study used already published, de-identified data and hence is  
54  
55 exempt from the ethics approval process. A detailed description of the methods is available in  
56  
57  
58  
59  
60

1  
2  
3 the protocol article (19). As discussed in the protocol article, initially the database search was  
4  
5 planned for articles published between 2009 and 2015 (19). However, considering the  
6  
7 increasing number of articles studying mobile screen media recently, the search was extended  
8  
9 to March 2017.  
10

### 11 ***Outcome measure***

12  
13  
14  
15 Mobile screen media use was the primary outcome measure. Mobile screen media use refers  
16  
17 to children's use of mobile screens, such as mobile phones, electronic tablets, handheld  
18  
19 computers or PDAs. The term 'screen time' is used to denote both the fixed screens and  
20  
21 mobile media screen device use. This terminology is used when referring to the screen time  
22  
23 guidelines for children and to refer to other articles that have studied children's total screen  
24  
25 time including both fixed and mobile screens.  
26  
27

28  
29  
30 Correlates of mobile screen media use have been placed into five categories as per the bio-  
31  
32 ecological model (14, 15). The five categories are:  
33

- 34 • *Child biological and demographic factors* includes age, sex and body mass index  
35  
36 (BMI).  
37
- 38 • *Family biological and demographic factors* includes demographic and biological  
39  
40 characteristics of the family members (particularly parents) and their education,  
41  
42 occupation and income.  
43  
44
- 45 • *Family structure factors* includes the number of siblings, family size and family type.  
46  
47
- 48 • *Behavioural factors* includes the child's behavioural characteristics and their skills  
49  
50 and attitudes.  
51  
52
- 53 • *Sociocultural/ environmental factors* includes social, physical and environmental  
54  
55 factors within the home setting and community, and parental behavioural factors such  
56  
57  
58  
59  
60

as their screen media skills, beliefs and attitudes towards the mobile screen media and self-efficacy to limit their children's screen viewing behaviours.

Direction of association has been reviewed separately for: a) smartphones; b) electronic tablets; c) touchscreens; and d) any media device (defined as the combination of traditional media plus at least one other mobile screen media device).

### ***Eligibility criteria***

The studies eligible for inclusion were peer-reviewed primary research articles with information on mobile screen media use, parent-child co-use or adherence to screen time guidelines as the outcome measure, that investigated the correlates of mobile screen media use among children aged eight and less; based in home or community setting; and published, or in press in English language journals between January 2009 to March 2017. The full description of the alignment of the research question to the Population, Exposure, Comparison and Outcome (PECO) format along with the exclusion criteria is presented in table 1

**Table 1: Research question using PECO format**

| <b>Criteria</b>         | <b>Description</b>                                                                                                                                                                                                                                                                                       |
|-------------------------|----------------------------------------------------------------------------------------------------------------------------------------------------------------------------------------------------------------------------------------------------------------------------------------------------------|
| <b>P: Population</b>    | Children aged eight years and less                                                                                                                                                                                                                                                                       |
| <b>E: Exposure</b>      | Correlates of mobile screen media use                                                                                                                                                                                                                                                                    |
| <b>C: Comparison</b>    | With vs. without the correlates                                                                                                                                                                                                                                                                          |
| <b>O: Outcome</b>       | Use of mobile screen media (e.g. mobile phones, electronic tablets, handheld computers, PDAs),                                                                                                                                                                                                           |
| <b>Types of studies</b> | Quantitative studies using all designs (cross-sectional, case-control, cohort and intervention studies)                                                                                                                                                                                                  |
| <b>Exclusion</b>        | Studies that have not reported correlates of mobile screen media use<br>Studies that have not included at least one form of mobile screen media device<br>Systematic reviews and meta-analysis<br>Grey literature<br>Qualitative studies<br>Studies carried out in settings other than home or community |

---

1  
2  
3 Studies carried out among unhealthy participants  
4 Studies with broader age-groups and no sub-group analysis for the  
5 target group  
6 Papers published before 2009 and after March 2017  
7 Papers published in language other than English  
8 Non-peer reviewed articles  
9  
10 Studies involving children older than 8 years  
11

---

### 12 13 14 15 ***Search strategy and study selection*** 16

17  
18 Eight electronic databases: Medline, Scopus, Embase, CINAHL Plus, Pubmed, ProQuest,  
19  
20 PsycINFO and Web of Science were searched for articles published between January 2009  
21  
22 and March 2017. Child related keywords including child\*, preschool, infant, kid and toddler  
23  
24 and screen related keywords including screen time, screen viewing, mobile phone, cell phone,  
25  
26 smartphone\*, PDA, tablet\*, iPad\*, handheld media, handheld computer\* were used to locate  
27  
28 potential papers in the databases. The search was carried out during September-October 2015  
29  
30 and replicated in March 2017. The search commenced with Medline and the identified papers  
31  
32 were excluded when searching other databases. However, only Embase, ProQuest and  
33  
34 CINAHL Plus provided that option. Duplicate records were manually removed after  
35  
36 compiling all the searches. The search strategy used in Medline database is presented in  
37  
38 Table 2. A total of 1909 articles were identified through searching the eight databases. To  
39  
40 ensure that all relevant articles were identified, a manual search of the reference lists of the  
41  
42 systematic reviews was also carried out along with the checking of the *Google Scholar*  
43  
44 profile of authors with frequent publication in this field. A total of seven papers were  
45  
46 retrieved from the manual searching process.  
47  
48  
49  
50

51  
52 Endnote (version X7.5) software was used for managing all the identified articles (n=1916).  
53  
54 Duplicate articles (n= 376) were removed. The remaining articles (n=1540) were then  
55  
56 screened by title by two authors (SP and NS). From this, irrelevant titles (n=1029) were  
57  
58  
59  
60



1  
2  
3 excluded. The abstract of the remaining articles (n= 511) were also reviewed by SP and NS;  
4  
5 and a further 427 articles were excluded. Full texts of the remaining articles (n=84) were  
6  
7 retrieved and reviewed by all the four researchers (SP, NS, JJ and JL) against the  
8  
9 inclusion/exclusion criteria, resulting in 13 papers being included in this systematic review.  
10  
11 The authors of this systematic review were not blinded to the name, journal title or  
12  
13 institutional affiliation of the authors of the articles selected. The process of study selection  
14  
15 has been presented using the PRISMA flow-diagram in Figure 1.  
16  
17  
18  
19  
20  
21  
22  
23  
24  
25  
26  
27  
28  
29  
30  
31  
32  
33  
34  
35  
36  
37  
38  
39  
40  
41  
42  
43  
44  
45  
46  
47  
48  
49  
50  
51  
52  
53  
54  
55  
56  
57  
58  
59  
60

Table 2: Search strategy used in Medline database

| Database: Ovid Medline (R) 1946 to 20th October 2015 |                                                                                                                                                                                           |         |
|------------------------------------------------------|-------------------------------------------------------------------------------------------------------------------------------------------------------------------------------------------|---------|
| SN                                                   | Search strategy                                                                                                                                                                           | Results |
| 1                                                    | Only Child/ or Child/ or child.mp. or Child, Preschool/                                                                                                                                   | 1767004 |
| 2                                                    | Infant/ or infant.mp.                                                                                                                                                                     | 1030660 |
| 3                                                    | Kid.mp.                                                                                                                                                                                   | 1251    |
| 4                                                    | Toddler.mp.                                                                                                                                                                               | 2240    |
| 5                                                    | 1 or 2 or 3 or 4                                                                                                                                                                          | 2242988 |
| 6                                                    | Screen time.mp.                                                                                                                                                                           | 639     |
| 7                                                    | Smartphones.mp. or Cell Phones/                                                                                                                                                           | 5961    |
| 8                                                    | Mobile phones.mp.                                                                                                                                                                         | 1627    |
| 9                                                    | Handheld computers.mp. or Computers, Handheld/                                                                                                                                            | 2721    |
| 10                                                   | Smartboard.mp.                                                                                                                                                                            | 2       |
| 11                                                   | PDA.mp.                                                                                                                                                                                   | 5860    |
| 12                                                   | Screen media.mp.                                                                                                                                                                          | 42      |
| 13                                                   | Mobile screen.mp.                                                                                                                                                                         | 5       |
| 14                                                   | Microcomputers/ or Computers, Handheld/ or electronic tablets.mp.                                                                                                                         | 16724   |
| 15                                                   | Tablets/ or Tablets.mp.                                                                                                                                                                   | 34967   |
| 16                                                   | Mobile Applications/ or iPads.mp.                                                                                                                                                         | 699     |
| 17                                                   | Handheld media.mp.                                                                                                                                                                        | 1       |
| 18                                                   | Touchscreens.mp.                                                                                                                                                                          | 22      |
| 19                                                   | Mobile devices.mp.                                                                                                                                                                        | 552     |
| 20                                                   | Digital technology.mp.                                                                                                                                                                    | 348     |
| 21                                                   | 6 or 7 or 8 or 9 or 10 or 11 or 12 or 13 or 14 or 15 or 16 or 17 or 18 or 19 or 20                                                                                                        | 64324   |
| 22                                                   | 5 and 21                                                                                                                                                                                  | 6648    |
| 23                                                   | ("Screen-viewing" or "screen time" or "mobile use" or "use of smartphones" or "Cell phone use" or "increased screen time" or "use of electronic tablets" or " use of mobile screens").mp. | 965     |
| 24                                                   | 5 and 21 and 23                                                                                                                                                                           | 525     |
| 25                                                   | Limit 24 to (English language and humans and yr="2009 -Current" and "all child (0 to 18 years)")                                                                                          | 482     |

\* Sign denotes for any character(s), SN= Serial number, mp=title, abstract, original title, name of substance word, subject heading word, keyword heading word, protocol supplementary concept word, rare disease supplementary concept word, unique identifier

### *Assessment of included papers*

A modified version of the checklist by Downs and Black (23) was used to assess the quality of studies and the risk of bias. Out of 27 suggested checklist items, relevant items in the themes of reporting (questions 1-3, 6, 7, 10), external validity (questions 11, 12) and internal validity-bias (questions 18, 20) were considered appropriate for this review. A score of '1' was allocated for 'Yes' and a score of '0' was allocated for 'No' and 'Unable to determine'. Out of a possible score of 10, a total score greater than 5 indicated a quality paper. Three researchers (SP, JJ and JL) independently carried out the appraisal using the checklist and the final quality score was ascertained by comparing each of their scores. Discrepancies in scores were re-assessed jointly, and a consensus reached.

### *Data extraction and management*

In order to maintain consistency and avoid bias, a data extraction table was developed. Information on study design, country of study, age-group of participants, sample size, main outcome variables, correlates and measures of association was extracted by one author (SP). Mean duration of screen-viewing specific to individual devices was also extracted when available. Adjusted Odds Ratio (AOR) and Standardised Coefficients (SC) were extracted in order to establish the correlates. Since there were few studies that assessed a particular variable, association and consistency could not be determined.

## **RESULTS**

### *Study characteristics*

Thirteen studies published between 2013 and 2017 were included in the review. Six were published in 2015 (1, 24-28), four in 2016 (29-32) and one in 2014 (33), 2013 (34) and 2017 (35). The majority of the eligible studies were conducted in high-income countries with four

1  
2  
3 from the USA (1, 24, 28, 30), three from the United Kingdom (25, 26, 34), two from Canada  
4  
5 (31, 35) and one from the Netherlands (27), Hong Kong (33), Malaysia (29) and Czech  
6  
7 Republic (32). All 13 studies were cross-sectional in design. The studies quality scores  
8  
9 ranged from 6 to 10 with a mean score of 7.85, indicating all were considered quality studies.  
10  
11  
12 The study sample sizes ranged from n=149 to n=3206. Two studies reported using weighted  
13  
14 data to be representative of the national population (1, 28), two studies used random sampling  
15  
16 (31, 32), one used stratified random sampling (29), while all other studies used non-  
17  
18 representative techniques (24-27, 30, 33-35). The mean age of participants was clearly stated  
19  
20 in eight studies (25, 27-32, 35) while four provided frequencies in different age-groups (24,  
21  
22 26, 33, 34). However, Connell et. al. (1) did not report children's mean age. Based on the  
23  
24 available data, the mean age of the children was (4.74 ± 1.72) years. The descriptive  
25  
26 characteristics of the included studies are presented in Table 3.  
27  
28  
29

### 30 31 *Mobile screen media use*

32  
33  
34 Eleven studies reported screen viewing as the outcome measure (25-35), one reported  
35  
36 adherence to the American Academy of Paediatrics (AAP) screen time guidelines (24) and  
37  
38 one reported parent-child co-use of media (1).  
39

40  
41 Children's mobile screen media use in all 13 studies was measured by parental self-report.  
42  
43 One paper reported face validity, content validity and test-retest reliability of the instrument  
44  
45 used (33) and five of the research questionnaires had been used in previous studies (1, 24,  
46  
47 28, 29, 35). Three studies stated parental-proxy reports as having reasonable reliability and  
48  
49 validity to measure children's mobile screen media use (25, 26, 34). Whilst, the other studies  
50  
51 did not report on the reliability and validity of their instrument (27, 30-32). Overall, the mean  
52  
53 duration of mobile screen media use could not be determined as only five studies reported the  
54  
55  
56  
57  
58  
59  
60

1  
2  
3 average duration (24, 27-29, 32), while all other studies categorised participants into groups,  
4  
5 such as less than 2 hours and more than 2 hours (1, 25, 26, 30, 31, 33-35).  
6  
7

### 8 ***Device use and correlates***

9  
10 In total, 36 correlates of mobile screen media use were studied. Of these correlates, children's  
11  
12 age was reported eight times, parental media use (fixed and mobile screens) seven times,  
13  
14 family income five times, and three variables (child sex, parental age and education) four  
15  
16 times, The remaining correlates were studied even fewer times (See table 4 and 5).  
17  
18

19 Association and consistency of the variables could not be determined as a majority of the  
20  
21 variables were studied in less than three studies.  
22  
23

24 Four studies reported an association specific to smart phones (1, 26, 28, 34) and electronic  
25  
26 tablets (1, 25, 28, 30). Nikken et. al. (27) reported combined results for touchscreens  
27  
28 (smartphones and electronic tablets) while the other six studies reported correlates for  
29  
30 electronic media, that included both traditional (e.g. televisions, computers) and new devices  
31  
32 (e.g. mobile phones and electronic tablets) (24, 29, 31-33, 35). Use of a PDA was not studied.  
33  
34  
35

### 36 **Correlates of mobile media use**

#### 37 ***Child biological and demographic factors***

38  
39 Six of the eight studies (75%) reported a positive association between the child's age and  
40  
41 mobile screen media use (24, 28, 30, 31, 33, 35) (Table 4). Older children were more likely to  
42  
43 use smartphones, tablets or any media compared to younger children (24, 28, 30, 31, 33, 35).  
44  
45  
46  
47

48 Carson and colleagues concluded that for every one month increase in age, the use of any  
49  
50 media increased by 9.3 minutes per day (95% CI: 2.8-15.8) (35). However, Connell et. al.  
51  
52 examined parent-child co-use of smartphones and electronic tablets and reported an inverse  
53  
54 association, indicating older children were less likely to co-use with parents (1). In contrast,  
55  
56  
57  
58  
59  
60

1  
2  
3 Nikken et. al. (27) concluded that the child's age had no significant association with the use  
4 of touchscreens. Females were more likely to use any media for a longer duration than their  
5 male counterparts (29, 35) but there was no any association with sex specifically in regard to  
6 touchscreen use (1, 27) . No association was found between the use of any media and child  
7 body mass index (BMI) (24).  
8  
9  
10  
11  
12  
13  
14  
15  
16  
17  
18  
19  
20  
21  
22  
23  
24  
25  
26  
27  
28  
29  
30  
31  
32  
33  
34  
35  
36  
37  
38  
39  
40  
41  
42  
43  
44  
45  
46  
47  
48  
49  
50  
51  
52  
53  
54  
55  
56  
57  
58  
59  
60

For peer review only

Table 3: Description of included studies

| S.N | Author               | Year | Country        | Study design    | Sample size | Age group                  | Outcome measure                  | Screen studied                                                                                   | Independent variables                                                                                                                    | Measure of association                                       | Quality score |
|-----|----------------------|------|----------------|-----------------|-------------|----------------------------|----------------------------------|--------------------------------------------------------------------------------------------------|------------------------------------------------------------------------------------------------------------------------------------------|--------------------------------------------------------------|---------------|
| 1   | Carson et. al (35).  | 2017 | Canada         | Cross-sectional | 149         | 12–35 months               | Children’s screen-time           | Television, videos, or DVDs on a television, computer, or portable device.                       | Parental and child demographics                                                                                                          | unstandardized beta coefficients and 95% confidence interval | 8             |
| 2   | Lee et. al. (29)     | 2016 | Malaysia       | Cross-sectional | 835         | 4-6 years                  | Children’s screen-time           | watching television or video, or playing with computer, smartphones, or other electronic gadgets | Parental and child demographics, places for play, barriers and motivators for active play                                                | P-value from chi-square test                                 | 7             |
| 3   | Pempek et. al. (30)  | 2016 | US             | Cross-sectional | 358         | 12-48 months               | Children and mother’s tablet use | Tablets                                                                                          | Child age, Mother’s tablet use, income, education, personal well-being and age                                                           | Standardised coefficients                                    | 7             |
| 4   | Pyper et. al. (31)   | 2016 | Canada         | Cross-sectional | 3206        | Under 18/screen time: 1-18 | Children’s screen-time           | Television, DVD player; computer or laptop; tablet or iPad®; and video game console              | Different types of parental support behaviours (motivational, instrumental, regulatory and conditional), parental and child demographics | Odds ratio and 95% Confidence interval                       | 10            |
| 5   | Sigmund et. al. (32) | 2016 | Czech Republic | Cross-sectional | 197         | 4-7 years                  | Children’s screen-time           | watching TV (DVD, video) and PC (notebook, tablet, smartphone)                                   | Days of week, parental step count and screen time                                                                                        | Pearson correlations with 95% confidence intervals           | 8             |

|    |                        |      |             |                 |      |           |                                             |                                                                      |                                                                                                              |                                        |   |
|----|------------------------|------|-------------|-----------------|------|-----------|---------------------------------------------|----------------------------------------------------------------------|--------------------------------------------------------------------------------------------------------------|----------------------------------------|---|
| 6  | Nikken et al. (27)     | 2015 | Netherlands | Cross-sectional | 896  | 0-7 years | Media ownership and use                     | TV, game consoles, computers and touchscreens                        | Parent and child characteristics (age, access, concerns about media use)                                     | Standardised coefficients              | 6 |
| 7  | Lauricella et al. (28) | 2015 | US          | Cross-sectional | 2300 | 0-8 years | Children's screen time                      | Television, computers, smartphones, and tablets                      | Parental media use, parental attitudes, child's age                                                          | Standardised coefficients              | 8 |
| 8  | Connell et al. (1)     | 2015 | US          | Cross-sectional | 2326 | 0-8 years | Parent-child co-use of media                | Books, TV, computers, video games, tablets, and smartphones          | Parent's time with child, parent's media use, parental and child demographics                                | Standardised coefficients              | 7 |
| 9  | Kesten et al. (26)     | 2015 | UK          | Cross-sectional | 735  | 6-8 years | Children's screen-time                      | TV, computer, smartphone, game-console and multi-SV                  | Parent's employment, education, number and sex of children, screen related limits                            | Odds ratio and 95% Confidence interval | 8 |
| 10 | Jago et al. (25)       | 2015 | UK          | Cross-sectional | 954  | 5-6 years | Children's screen-time                      | TV, computer/laptop use including tablets                            | Parenting styles and parental self-efficacy to limit screen time                                             | Odds ratio and 95% Confidence interval | 8 |
| 11 | Asplund et al. (24)    | 2015 | US          | Cross-sectional | 314  | 0-5 years | Adherence to AAP guidelines for screen time | TV, video games, computers, cell phones and other electronic devices | Child BMI, child/parent demographics, and household media environment, parental attitudes towards TV viewing | Odds ratio and 95% Confidence interval | 9 |
| 12 | Wu et al. (33)         | 2014 | Hong Kong   | Cross-sectional | 202  | 3-6 years | Use of digital products                     | Television, digital tablets, smart phones, etc                       | Participants' demographics, parenting approach (restrictive, instructive and co-using)                       | P-value from chi-square test           | 8 |
| 13 | Jago et al. (34)       | 2013 | UK          | Cross-sectional | 750  | 6-8 years | Children's screen-time                      | TV, game console, smartphone and multiscreen-viewing                 | Parental media use, parental attitudes and access to media equipment                                         | Odds ratio and 95% Confidence interval | 8 |



Table 4: Demographic and biological correlates of mobile screen media use and direction of association

| Variable type                             | Variables                           | Smartphones    |       | Tablets     |            | Touchscreens |       | Any media device                 |                  |      |
|-------------------------------------------|-------------------------------------|----------------|-------|-------------|------------|--------------|-------|----------------------------------|------------------|------|
|                                           |                                     | Association    | Study | Association | Study      | Association  | Study | Association                      | Study            |      |
| Child biological and demographic factors  | Child age                           | +              | (28)  | +           | (28, 30)   | 0            | (27)  | +                                | (24, 31, 33, 35) |      |
|                                           |                                     | - (co-use)     | (1)   | - (co-use)  | (1)        |              |       |                                  |                  |      |
|                                           | Child sex (0= boy)                  | 0              | (1)   | 0           | (1)        | 0            | (27)  | +                                | (29, 35)         |      |
|                                           | BMI                                 |                |       |             |            |              |       | 0                                | (24)             |      |
| Family biological and demographic factors | Parental age                        | 0              | (1)   | 0           | (1, 30)    |              |       | 0                                | (24)             |      |
|                                           |                                     |                |       |             |            |              |       | -                                | (33)             |      |
|                                           | Parent's sex (0 = father)           | 0              | (1)   | 0           | (1)        | 0            | (27)  |                                  |                  |      |
|                                           | Family income                       |                |       |             | 0          | (30)         | +     | (27)                             | 0                | (29) |
|                                           |                                     |                |       |             |            |              |       |                                  | +                | (35) |
|                                           |                                     |                |       |             |            |              |       |                                  | -                | (33) |
|                                           | Parent's occupation (0= unemployed) |                |       |             |            |              |       | -                                | (33)             |      |
|                                           | Parent's education                  | 0              | (1)   | 0           | (1, 30)    | 0            | (27)  | 0                                | (29)             |      |
| Language                                  |                                     |                |       |             |            |              | 0     | (24)                             |                  |      |
|                                           |                                     |                |       |             |            |              | 0     | (24)                             |                  |      |
| Race/Ethnicity                            | +                                   | (Non-Hispanic) | (1)   | +           | (Hispanic) | (1)          |       | - ( European-Canadian-Caucasian) | (29)             |      |
| Country of birth                          |                                     |                |       |             |            |              | 0     | (29, 35)                         |                  |      |
| Family structure factors                  | Family size                         |                |       |             |            | 0            | (27)  |                                  |                  |      |
|                                           | Number of children in the family    |                |       |             |            |              |       | +                                | (33)             |      |

Note: '+' denotes Positive association, '-' denotes Negative association, '0' denotes No association (significant at 95% confidence level,  $p < 0.05$ ), Empty cells denote that association for that variable has not been studied, '( )' denotes reference.

Touchscreens includes combined results for smartphones and tablets while any media includes combination of traditional media with at least one form of mobile screen media devices.

### 1 *Family biological and demographic factors*

2 Four studies reported an association between parental age and their children's mobile screen  
3 media use (1, 24, 30, 33) (see Table 4). Of these, three reported no statistically significant  
4 association (1, 24), while Wu et. al. found a negative association, indicating that screen  
5 devices (both fixed and mobile screens) were more frequently used by children with younger  
6 parents (33).

7 Mixed associations were found between family income and children's mobile screen media  
8 use (see Table 4). Two studies (27, 35) reported a positive association, indicating that  
9 children from high-income families were using touchscreens or any media device longer than  
10 those from low-income families. Conversely, studies by Pempek et. al.(30) and Lee et.  
11 al.(29) found no association with family income, and Wu et. al. (33) reported a negative  
12 association. Wu also found a negative association between parent's occupational status and  
13 children's mobile screen media use (33). Furthermore children of stay-at-home parents used  
14 screen devices more frequently than those whose parents were employed (33).

15 No association was identified between young children's smartphone, electronic tablet or any  
16 touchscreen use and parent's sex (1, 27). Similarly, parent's educational status (1, 27, 29,  
17 30), country of birth (35) and language (24) did not show any significant association with  
18 children's mobile screen media use.

### 19 *Family structure factors*

20 Two studies reported family factors associated with children's mobile screen media use (27,  
21 33) (Table 4). A positive association was reported between the number of children and use of  
22 televisions, computers, tablets and mobile phones (33), and when there were two or more

1 children, they were more likely to use screen devices (both fixed and mobile screens) for  
2 talking with friends compared to those families with one child (33).

### 3 ***Behavioural factors***

4 Children's ability or skill to use mobile screen media devices was the only behavioural skill  
5 studied and was found to have a positive association with frequency and duration of device  
6 use (27) (see Table 5). Furthermore, children who were better skilled in using mobile screen  
7 media devices had greater access to these devices in their bedrooms and spent more time on  
8 them than less-skilled children (27).

### 9 ***Sociocultural/ environmental factors***

10 In total, 21 sociocultural/environmental correlates were investigated (see Table 5). Parental  
11 screen time/media use (both mobile and fixed screens) was the most studied variable (1, 24,  
12 27, 28, 30, 32, 34). Two studies concluded that there was no statistically significant  
13 association between parental smartphone use and their children's use (1, 34). Positive  
14 associations have also been reported for parental screen time and children's use of tablets,  
15 touchscreen devices or any media (1, 24, 27, 28, 30, 32). Sigmund et. al. concluded that the  
16 association between parental and children any media use was stronger during weekends than  
17 on weekdays (32).

18 Parental attitudes about the effects of mobile screen media on children were positively  
19 associated with smartphone and electronic tablet use for older young children (4-8 years)  
20 (28). More positive parental attitudes towards these devices resulted in greater use by the  
21 children (28). Similarly, parental belief in the negative effects of mobile screen media screen  
22 devices, was not associated with children's use of these devices (27). However, children

1  
2  
3 1 were more likely to use mobile screen media devices when parents believed that these  
4  
5  
6 2 devices were helpful as a behavioural regulation tool (27), while parental nurturing and self-  
7  
8 3 efficacy to limit mobile media use were negatively associated with electronic tablet use (25).  
9  
10  
11 4 Children in parental care were more likely to have higher any media use than children in  
12  
13 5 child care (35). Similarly, any media use was higher during weekends than weekdays  
14  
15  
16 6 (32).The number of media devices at home, and in the child's bedroom were positively  
17  
18 7 associated with increased smartphone use (34). Jago et. al. (34) concluded that the greater the  
19  
20 8 number of devices, the greater the use, while Asplund et. al. (24) reported no such  
21  
22  
23 9 association.  
24  
25  
26 10

1

**Table 5: Environmental and behavioural correlates of mobile screen media use and direction of association**

| Variable type                               | Variables                                                               | Smartphones |              | Tablets    |             | Touchscreens |       | Any media device  |                           |
|---------------------------------------------|-------------------------------------------------------------------------|-------------|--------------|------------|-------------|--------------|-------|-------------------|---------------------------|
|                                             |                                                                         | Assoc       | Study        | Assoc      | Study       | Assoc        | Study | Assoc             | Study                     |
| <b>Behavioural factors</b>                  | Child media skills                                                      |             |              |            |             | +            | (27)  |                   |                           |
| <b>Sociocultural/ environmental factors</b> | Parental media use/screen time                                          | + (>2 yrs)  | (28)         | +          | (1, 28, 30) | +            | (27)  | +                 | (24) ( $\geq 2$ yrs) (32) |
|                                             |                                                                         | 0           | (1, 34)      |            |             |              |       |                   |                           |
|                                             | Parent attitudes on effects of media on children                        | + (>6 yrs)  | (28)         | + (>2 yrs) | (28)        |              |       |                   |                           |
|                                             | Parental belief that media has positive effects on children             | 0           | (34)         |            |             | 0            | (27)  |                   |                           |
|                                             | Parental belief that media has negative effects on children             |             |              |            |             | 0            | (27)  |                   |                           |
|                                             | Parents belief on pacifying nature of media                             |             |              |            |             | +            | (27)  |                   |                           |
|                                             | Parents belief that media are too complicated for young children to use |             |              |            |             | 0            | (27)  |                   |                           |
|                                             | Parent's time with child                                                | 0           | (1)          | 0          | (1)         |              |       |                   |                           |
|                                             | Parental limit setting on media use                                     | 0           | (26) (boys)  |            |             |              |       |                   |                           |
|                                             |                                                                         | + (always)  | (26) (girls) |            |             |              |       |                   |                           |
|                                             | Collaborative rule setting                                              | 0           | (26)         |            |             |              |       |                   |                           |
|                                             | Parental control on media use                                           |             |              | 0          | (25)        |              |       |                   |                           |
|                                             | Parental nurturance                                                     |             |              | -          | (25)        |              |       |                   |                           |
|                                             | Parental self-efficacy                                                  |             |              | -          | (25)        |              |       |                   |                           |
|                                             | Type of child care (0= parental care)                                   |             |              |            |             |              |       | -                 | (35)                      |
|                                             | Mother's relational well-being                                          |             |              | 0          | (30)        |              |       |                   |                           |
|                                             | Mother's personal well-being                                            |             |              | 0          | (30)        |              |       |                   |                           |
|                                             | Days of week (0=Weekdays)                                               |             |              |            |             |              |       | +                 | (32)                      |
| Parental step count/physical activity       |                                                                         |             |              |            |             |              | -     | (32)              |                           |
| TV on during dinner                         |                                                                         |             |              |            |             |              | +     | (24) ( $\geq 2$ ) |                           |

1  
2  
3  
4  
5  
6  
7  
8  
9  
10  
11  
12  
13  
14  
15  
16  
17  
18  
19  
20  
21  
22  
23  
24  
25  
26  
27  
28  
29  
30  
31  
32  
33  
34  
35  
36  
37  
38  
39  
40  
41  
42  
43  
44  
45  
46  
47  
48  
49

|  |                                         |   |      |  |  |  |  |  |   |      |
|--|-----------------------------------------|---|------|--|--|--|--|--|---|------|
|  |                                         |   |      |  |  |  |  |  |   | yrs) |
|  | Number of TVs/screens at home           | + | (34) |  |  |  |  |  | 0 | (24) |
|  | Computer's outside children's bedroom   |   |      |  |  |  |  |  | + | (33) |
|  | Screen viewing items in child's bedroom | + | (34) |  |  |  |  |  |   |      |

1 Note: '+' denotes Positive association, '-' denotes Negative association, '0' denotes No association (significant at 95% confidence level, p<0.05),  
2 Empty cells denote that association for that variable has not been studied, '(')' denotes reference.  
3 Touchscreens includes combined results for smartphones and tablets while any media includes combination of traditional media with at least one form of mobile screen  
4 media devices.

For peer review only

## 1 DISCUSSION

2 This systematic review identified 36 reported correlates of mobile screen media use  
3 among children aged eight years or less from thirteen studies. Although this review  
4 searched for eligible articles published between 2009 and 2017, the included studies were  
5 published between 2013 and 2017, indicating limited but recent and increasing interest in  
6 this area.

7 This review found that children aged between four and eight years were more likely to  
8 have higher mobile screen media use. Similarly, those who were better skilled in using  
9 the devices, had more access to media devices at home, and higher parental use of mobile  
10 screen media were more likely to have higher mobile screen media use. The bio-  
11 ecological model posits that human behaviour is affected by intrapersonal factors, inter-  
12 personal factors and distal factors which interact to shape our behaviour (18, 36),  
13 however, the findings of this review suggest that in the case of children aged eight years  
14 and less, distal factors such as parental behaviours, and the home environment can be  
15 more influential in shaping their behaviour.

16 The majority of studies in this review reported a positive association between the child's  
17 age and their mobile screen media use. Older children were more likely to use mobile  
18 screen media devices compared to their younger counterparts. This finding is consistent  
19 with a systematic review of traditional screen time use among children three years and  
20 younger (14). Potential reasons for increased mobile screen media use with increasing age  
21 include: greater access/ownership of these devices; decreased parental control and media  
22 use rules; and greater skills as a child ages (37, 38). Studies have found that parents tend  
23 to set more rules regarding screen time for younger children (37), suggesting childhood

1  
2  
3 1 screen habits are reflected in adolescence and adulthood (6), and highlighting the  
4  
5 2 importance of managing mobile screen media use with younger children.  
6  
7

8 3 Higher mobile screen media use by older children in the family has implications for  
9  
10 4 younger siblings. One study in the review reported households with more than one child  
11  
12 5 used screen devices (both fixed and mobile screens) more frequently (33), which could be  
13  
14 6 the result of younger children observing and modelling the behaviour of older siblings. Of  
15  
16 7 interest, role modelling either by parents or older siblings has been used effectively in  
17  
18 8 other areas to influence children's behaviours (39, 40), and could be an important strategy  
19  
20 9 to decrease young children's mobile media use.  
21  
22  
23

24 10 Mixed results in regards to parental age and children's mobile screen media use were  
25  
26 11 reported. Consistent with this review, previous systematic reviews on traditional media  
27  
28 12 have reported an unclear association with their use and parental age (14-16). Parents who  
29  
30 13 used mobile screen media were more likely to have children who used these devices and  
31  
32 14 for a longer time (1, 24, 27, 28). Furthermore, children of families who watch more TV  
33  
34 15 are more likely to engage in higher screen-viewing (14, 16, 41-43). Therefore, children of  
35  
36 16 parents with higher mobile screen media use may be more likely to have higher use due to  
37  
38 17 parent role-modelling, thus being considered 'normal behaviour' (44).  
39  
40  
41

42 18 Parent-child co-use of mobile screen media was highest for children younger than two  
43  
44 19 years and decreased as the child aged (1). This may be due to younger children being less  
45  
46 20 able to manipulate technology or inability to unlock password protected devices and  
47  
48 21 therefore requiring parental support to operate the device. Furthermore, younger children  
49  
50 22 may spend more time at home with their parents, providing more opportunities for parent-  
51  
52 23 child co-use (1). It should be noted, that decreased co-use with increasing age of children  
53  
54 24 reduces monitoring opportunities for parents.  
55  
56  
57  
58  
59  
60



1  
2  
3 1 The review found, children of stay-at-home parents had higher mobile screen media use  
4  
5 2 (33). This suggests parents could be more engaged in screen-viewing, providing a  
6  
7 3 supportive environment for mobile screen media use. Conversely self-reported data, from  
8  
9 4 employed parents might under-report their children's media use. Other systematic  
10  
11 5 reviews focusing on children's traditional screen time report that parental occupation is  
12  
13 6 rarely studied, thus it is difficult to draw any specific conclusion (14, 15). This is an area  
14  
15 7 worthy of future research as parents working long hours or bringing their work home may  
16  
17 8 minimise monitoring of children's mobile screen media habits.

18  
19  
20  
21 9 Use of mobile screen media devices was higher among children whose parents believed  
22  
23 10 in the pacifying effects of these devices. Parents are at times using these devices as  
24  
25 11 behavioural regulation tools to secure free time or when busy with household chores or  
26  
27 12 shopping (4, 8, 13, 45). Parents may not be aware that they are contributing to the  
28  
29 13 development of their children's mobile screen media use behaviours or the possible  
30  
31 14 impacts (33) that these devices and their unmonitored use may have (46).

### 32 33 34 35 15 ***Methodological limitations of studies reviewed***

36  
37  
38 16 A strength of this study was the protocol paper that guided the methodology of the review  
39  
40 17 (19), however, we did not search the grey literature or include qualitative studies. A  
41  
42 18 major limitation of the studies reviewed was the lack of objective measures to assess  
43  
44 19 children's media use with parental proxy reports used in all of the studies. This approach  
45  
46 20 may underestimate or overestimate true exposure because of recall bias, social desirability  
47  
48 21 bias or simply not being aware of screen viewing behaviours (6). In addition, only one  
49  
50 22 study tested reliability and validity of their instrument (33) while others either relied on  
51  
52 23 previously used questionnaires with unknown validity/reliability estimates. The review  
53  
54 24 was also challenging due to the lack of standardised terminology when researching  
55  
56  
57  
58  
59  
60

1  
2  
3 1 mobile media screen use research, as well as the lack of standardised reporting of findings  
4  
5 2 by age. The American Academy of Paediatrics (12) recommendations for children screen  
6  
7 3 media uses the aged categories: a) younger than 18 months; b) 18-24 months; c) 2-5  
8  
9  
10 4 years; and d) 6 and older. However, the studies in this review often reported across these  
11  
12 5 age groups or failed to provide detailed information of the targets group's age when  
13  
14 6 undertaking analysis. This made interpretation of findings challenging and should be  
15  
16 7 addressed in any future studies in this area.  
17  
18

## 19 8 **CONCLUSION**

20  
21  
22 9 Despite the rapid growth in mobile technologies, this review on the correlates of mobile  
23  
24 10 screen media use among children 0-8 years identified limited but increasing research  
25  
26 11 being undertaken in this area. The review found that correlates such as child's age and  
27  
28 12 media skills, parental media use and access to media devices at home appeared to impact  
29  
30 13 on determining the mobile screen media use. Screen media use can certainly enhance life  
31  
32 14 experiences and learnings, however it is important that it is used appropriately and the  
33  
34 15 family environment can play a key role in the maintaining a healthy media intake. To  
35  
36 16 better understand the impact of environmental factors on children's mobile screen media  
37  
38 17 and stimulate discussion, we need to better understand the role of parental rules; the use  
39  
40 18 of mobile screen devices as behavioural regulation tools; and the role of parents and older  
41  
42 19 siblings as role models. To achieve this, we need valid and reliable objective measures,  
43  
44 20 use of standardised terminology, and the reporting of findings against specific age groups.  
45  
46 21 These approaches will support a better understanding of the correlates of mobile screen  
47  
48 22 media use and traditional screen media use when undertaking future research.  
49  
50  
51  
52  
53  
54  
55  
56  
57  
58  
59  
60

1  
2  
3 **1 List of abbreviations used**  
4

5  
6 2 PDA: Personal Digital Assistants  
7

8  
9 3 PRISMA: Preferred Reporting Items for Systematic Reviews and Meta-analyses  
10

11 **4 Declarations:**  
12

13  
14 **5 Ethics approval and consent to participate**  
15

16  
17 6 Since this systematic review uses already published, de-identified data, it is hence exempt  
18  
19 7 from the ethics approval process. It does not involve any contact with the human  
20  
21 8 participants and has not collected any primary data.  
22  
23

24 **9 Consent for publication**  
25

26  
27 10 This is “Not applicable” for this study as it does not report any individual level data.  
28  
29

30 **11 Availability of data and material**  
31

32  
33 12 The findings of this review rely on the data presented on the papers that are already  
34  
35 13 published and are easily accessible on public domains.  
36  
37

38 **14 Competing interests**  
39

40  
41 15 The authors declare that they have no financial and non-financial competing interests.  
42  
43

44 **16 Funding**  
45

46  
47 17 This study has not received any funding from any source.  
48  
49

50 **18 Data sharing statement**  
51

52  
53 19 The findings of this review rely on the data presented on the papers that are already  
54  
55 20 published and are easily accessible on public domains.  
56  
57

58 21  
59  
60

1  
2  
3 **1 Author's contribution**  
4

5  
6 2 SP, JL and JJ jointly conceived and designed the study. SP was responsible for searching  
7  
8 3 the literature, screening the papers, working on design, critically reviewing the papers and  
9  
10 4 drafting the manuscript. JJ provided overall supervision for the study, finalised  
11  
12 5 methodology, screening of full text, quality assessment, and edited the manuscript. NS  
13  
14 6 was involved in searching the database, initial screening of title and abstracts and revised  
15  
16 7 the manuscript. JL contributed to design, screening of full text, quality assessment, and  
17  
18 8 organised and revised the manuscript. All authors have read and approved the final  
19  
20 9 version of manuscript.  
21  
22

23  
24 **10 Acknowledgements**  
25

26 11 We would like to acknowledge the support of Public health faculty librarian of Curtin  
27  
28 12 University, Ms. Diana Blackwood for her guidance during the database searching stage.  
29

30  
31 **13 Author's information**  
32

33 14 Susan Paudel (BPH, MPH, MHIthProm): School of Public Health, Curtin University,  
34  
35 15 Western Australia, Email: [replysusan@gmail.com](mailto:replysusan@gmail.com)  
36

37  
38 16 Dr. Jonine Jancey ( BSc (Hons) PhD) : Associate Professor, Collaboration for Evidence,  
39  
40 17 Research and Impact in Public Health (CERIPH), School of Public Health, Curtin  
41  
42 18 University, Email: [j.jancey@curtin.edu.au](mailto:j.jancey@curtin.edu.au)  
43  
44

45 19 Narayan Subedi (BPH, MPH, PGDPHN): Assistant Professor, Department of Community  
46  
47 20 Medicine and Public Health, Maharajgunj Medical Campus, Institute of Medicine,  
48  
49 21 Tribhuvan University, Nepal, Email: [subedi.narayan@gmail.com](mailto:subedi.narayan@gmail.com)  
50  
51

52  
53 22 Dr. Justine Leavy (BSc, MPH, PhD): Senior Lecturer, Collaboration for Evidence,  
54  
55 23 Research and Impact in Public Health (CERIPH), School of Public Health, Curtin  
56  
57 24 University, Email: [j.leavy@curtin.edu.au](mailto:j.leavy@curtin.edu.au)  
58  
59  
60

1  
2  
3  
4  
5  
6  
7  
8  
9  
10  
11  
12  
13  
14  
15  
16  
17  
18  
19  
20  
21  
22  
23  
24  
25  
26  
27  
28  
29  
30  
31  
32  
33  
34  
35  
36  
37  
38  
39  
40  
41  
42  
43  
44  
45  
46  
47  
48  
49  
50  
51  
52  
53  
54  
55  
56  
57  
58  
59  
60

1

For peer review only

## 1        2        3        4        5        6        7        8        9        10        11        12        13        14        15        16        17        18        19        20        21        22        23        24        25        26        27        28        29        30        31        32        33        34        35        36        37        38        39        40        41        42        43        44        45        46        47        48        49        50        51

## References

1. Connell SL, Lauricella AR, Wartella E. Parental Co-Use of Media Technology with their Young Children in the USA. *Journal of Children and Media*. 2015;9(1):5-21.
2. Holloway D, Green L, Livingstone S. Zero to eight: Young children and their internet use. London: LSE, EU Kids Online; 2013.
3. Rideout V. Zero to eight: Children's media use in America 2013. United States of America: Common Sense Media, 2013.
4. Kabali HK, Irigoyen MM, Nunez-Davis R, Budacki JG, Mohanty SH, Leister KP, et al. Exposure and use of mobile media devices by young children. *Pediatrics*. 2015;2015-151.
5. Houghton S, Hunter SC, Rosenberg M, Wood L, Zadow C, Martin K, et al. Virtually impossible: limiting Australian children and adolescents daily screen based media use. *BMC Public Health*. 2015;15(1):1.
6. Downing KL, Hnatiuk J, Hesketh KD. Prevalence of sedentary behavior in children under 2years: A systematic review. *Preventive Medicine*. 2015;78:105-14.
7. Christakis DA. Interactive media use at younger than the age of 2 years: time to rethink the American Academy of Pediatrics guideline? *JAMA pediatrics*. 2014;168(5):399-400.
8. Radesky JS, Schumacher J, Zuckerman B. Mobile and interactive media use by young children: the good, the bad, and the unknown. *Pediatrics*. 2015;135(1):1-3.
9. Troseth GL, Russo CE, Strouse GA. What's next for research on young children's interactive media? *Journal of Children and Media*. 2016;10(1):54-62.
10. Strasburger V., Hogan M. Policy Statement: children, adolescents and the media. *Pediatrics*. 2013;132:958-61.
11. Department of Health. Australia's Physical Activity and Sedentary Behaviour Guidelines: Australian Government; 2015 [Available from: <http://www.health.gov.au/internet/main/publishing.nsf/content/health-pubhlth-strateg-phys-act-guidelines#npa05>].
12. American Academy of Pediatrics. American Academy of Pediatrics Announces New Recommendations for Children's Media Use USA: American Academy of Pediatrics; 2017 [Available from: <https://www.aap.org/en-us/about-the-aap/aap-press-room/pages/american-academy-of-pediatrics-announces-new-recommendations-for-childrens-media-use.aspx>].
13. Radesky JS, Peacock-Chambers E, Zuckerman B, Silverstein M. Use of Mobile Technology to Calm Upset Children: Associations With Social-Emotional Development. *JAMA Pediatrics*. 2016;170(4):397-9.
14. Duch H, Fisher EM, Ensari I, Harrington A. Screen time use in children under 3 years old: a systematic review of correlates. *Int J Behav Nutr Phys Act*. 2013;10(1):1-10.
15. Hinkley T, Salmon J, Okely AD, Trost SG. Correlates of sedentary behaviours in preschool children: a review. *Int J Behav Nutr Phys Act*. 2010;7(66):10.
16. Cillero IH, Jago R. Systematic review of correlates of screen-viewing among young children. *Preventive Medicine*. 2010;51(1):3-10.
17. Vanderloo LM. Screen-viewing among preschoolers in childcare: A systematic review. *BMC Pediatrics*. 2014;14(1):205.
18. Lawman HG, Wilson DK. A review of family and environmental correlates of health behaviors in high-risk youth. *Obesity*. 2012;20(6):1142-57.
19. Paudel S, Leavy J, Jancey J. Correlates of mobile screen media use among children aged 0–8: protocol for a systematic review. *Systematic reviews*. 2016;5(1):1.
20. Moher D, Liberati A, Tetzlaff J, Altman DG, Group P. Preferred reporting items for systematic reviews and meta-analyses: the PRISMA statement. *International Journal of Surgery*. 2010;8(5):336-41.
21. Knobloch K, Yoon U, Vogt PM. Preferred reporting items for systematic reviews and meta-analyses (PRISMA) statement and publication bias. *Journal of Cranio-Maxillofacial Surgery*. 2011;39(2):91-2.

- 1  
2  
3 1 22. Liberati A, Altman DG, Tetzlaff J, Mulrow C, Gøtzsche PC, Ioannidis JPA, et al. The  
4 2 PRISMA statement for reporting systematic reviews and meta-analyses of studies that evaluate  
5 3 health care interventions: explanation and elaboration. *Journal of Clinical Epidemiology*.  
6 4 2009;62(10):e1-e34.  
7 5 23. Downs SH, Black N. The feasibility of creating a checklist for the assessment of the  
8 6 methodological quality both of randomised and non-randomised studies of health care  
9 7 interventions. *Journal of Epidemiology and Community Health*. 1998;52(6):377-84.  
10 8 24. Asplund KM, Kair LR, Arain YH, Cervantes M, Oreskovic NM, Zuckerman KE. Early  
11 9 childhood screen time and parental attitudes toward child television viewing in a low-income  
12 10 latino population attending the special supplemental nutrition program for women, infants, and  
13 11 children. *Childhood Obesity*. 2015;11(5):590-9.  
14 12 25. Jago R, Wood L, Zahra J, Thompson JL, Sebire SJ. Parental control, nurturance, self-  
15 13 efficacy, and screen viewing among 5-to 6-year-old children: a cross-sectional mediation analysis  
16 14 to inform potential behavior change strategies. *Childhood Obesity*. 2015;11(2):139-47.  
17 15 26. Kesten JM, Sebire SJ, Turner KM, Stewart-Brown S, Bentley G, Jago R. Associations  
18 16 between rule-based parenting practices and child screen viewing: a cross-sectional study.  
19 17 *Preventive Medicine Reports*. 2015;2:84-9.  
20 18 27. Nikken P, Schols M. How and Why Parents Guide the Media Use of Young Children.  
21 19 *Journal of Child and Family Studies*. 2015;24(11):3423-35.  
22 20 28. Lauricella AR, Wartella E, Rideout VJ. Young children's screen time: The complex role of  
23 21 parent and child factors. *Journal of Applied Developmental Psychology*. 2015;36:11-7.  
24 22 29. Lee ST, Wong JE, Ong WW, Ismail MN, Deurenberg P, Poh BK. Physical activity pattern of  
25 23 Malaysian preschoolers: Environment, barriers, and motivators for active play. *Asia-Pacific  
26 24 Journal of Public Health*. 2016;28(5, Suppl):21S-34S.  
27 25 30. Pempek T, McDaniel B. Young Children's Tablet Use and Associations with Maternal  
28 26 Well-Being. *Journal of Child & Family Studies*. 2016;25(8):2636-47.  
29 31 31. Pyper E, Harrington D, Manson H. The impact of different types of parental support  
30 28 behaviours on child physical activity, healthy eating, and screen time: a cross-sectional study.  
31 29 *Bmc Public Health*. 2016;16.  
32 30 32. Sigmund E, Badura P, Vokacova J, Sigmundova D. Parent-Child Relationship of  
33 31 Pedometer-Assessed Physical Activity and Proxy-Reported Screen Time in Czech Families with  
34 32 Preschoolers. *International Journal of Environmental Research and Public Health*. 2016;13(7).  
35 33 33. Wu CST, Fowler C, Lam WYY, Wong HT, Wong CHM, Loke AY. Parenting approaches and  
36 34 digital technology use of preschool age children in a Chinese community. *Italian Journal of  
37 35 Pediatrics*. 2014;40(1):1-8.  
38 36 34. Jago R, Sebire SJ, Lucas PJ, Turner KM, Bentley GF, Goodred JK, et al. Parental modelling,  
39 37 media equipment and screen-viewing among young children: Cross-sectional study. *BMJ Open*.  
40 38 2013;3(4).  
41 39 35. Carson V, Kuzik N. Demographic correlates of screen time and objectively measured  
42 40 sedentary time and physical activity among toddlers: a cross-sectional study. *Bmc Public Health*.  
43 41 2017;17.  
44 42 36. Bronfenbrenner U, Evans GW. Developmental Science in the 21st Century: Emerging  
45 43 Questions, Theoretical Models, Research Designs and Empirical Findings. *Social Development*.  
46 44 2000;9(1):115-25.  
47 45 37. Warren R. Parental mediation of preschool children's television viewing. *J Broadcast  
48 46 Electron Media*. 2003;47(3):394-417.  
49 47 38. Australian Communications and Media Authority (ACMA). Access to the internet,  
50 48 broadband and mobile phones in family households. Australia: 2008.  
51 49 39. Brown R, Ogden J. Children's eating attitudes and behaviour: a study of the modelling  
52 50 and control theories of parental influence. *Health education research*. 2004;19(3):261-71.

- 1  
2  
3 1 40. Draxten M, Fulkerson JA, Friend S, Flattum CF, Schow R. Parental role modeling of fruits  
4 2 and vegetables at meals and snacks is associated with children's adequate consumption.  
5 3 Appetite. 2014;78:1-7.  
6 4 41. Xu H, Wen LM, Rissel C. Associations of parental influences with physical activity and  
7 5 screen time among young children: a systematic review. Journal of Obesity. 2015;2015.  
8 6 42. Birken CS, Maguire J, Mekky M, Manlhiot C, Beck CE, Jacobson S, et al. Parental factors  
9 7 associated with screen time in pre-school children in primary-care practice: a TARGet Kids!  
10 8 study. Public Health Nutrition. 2011;14(12):2134-38.  
11 9 43. Jago R, Thompson JL, Sebire SJ, Wood L, Pool L, Zahra J, et al. Cross-sectional  
12 10 associations between the screen-time of parents and young children: differences by parent and  
13 11 child gender and day of the week. Int J Behav Nutr Phys Act. 2014;11(1):54-64.  
14 12 44. Schoeppe S, Rebar AL, Short CE, Alley S, Van Lippevelde W, Vandelanotte C. How is  
15 13 adults' screen time behaviour influencing their views on screen time restrictions for children? A  
16 14 cross-sectional study. BMC public health. 2016;16(1):201.  
17 15 45. Chiong C., Shuler C. Learning: Is there an app for that? Investigations of young children's  
18 16 usage and learning with mobile devices and apps. Sesame Workshop; The Joan Ganz Cooney  
19 17 Centre, New York 2010.  
20 18 46. Kim J-K, Kang Y-S. The Effects of Young Children's Smartphone Use Experience on Their  
21 19 Parents' Perceptions and Needs and Their Self-Regulation. International Journal of Applied  
22 20 Engineering Research. 2016;11(2):1208-11.

21

22



1  
2  
3  
4  
5  
6  
7  
8  
9  
10  
11  
12  
13  
14  
15  
16  
17  
18  
19  
20  
21  
22  
23  
24  
25  
26  
27  
28  
29  
30  
31  
32  
33  
34  
35  
36  
37  
38  
39  
40  
41  
42  
43  
44  
45  
46  
47  
48  
49  
50  
51  
52  
53  
54  
55  
56  
57  
58  
59  
60

1

**Figure 1: PRISMA flow chart for study selection**

For peer review only

1  
2  
3  
4  
5  
6  
7  
8  
9  
10  
11  
12  
13  
14  
15  
16  
17  
18  
19  
20  
21  
22  
23  
24  
25  
26  
27  
28  
29  
30  
31  
32  
33  
34  
35  
36  
37  
38  
39  
40  
41  
42  
43  
44  
45  
46  
47  
48  
49  
50  
51  
52  
53  
54  
55  
56  
57  
58  
59  
60

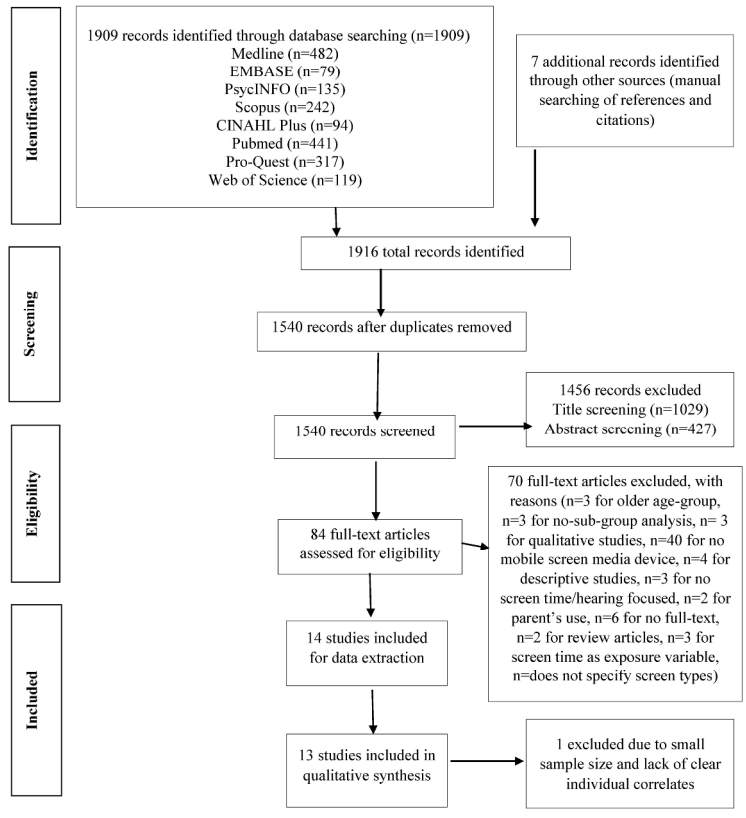

Figure 1: PRISMA flow chart for study selection

Figure 1: PRISMA flowchart for study selection

297x420mm (300 x 300 DPI)

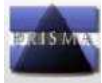

# PRISMA 2009 Checklist

1  
2  
3  
4  
5  
6  
7  
8  
9  
10  
11  
12  
13  
14  
15  
16  
17  
18  
19  
20  
21  
22  
23  
24  
25  
26  
27  
28  
29  
30  
31  
32  
33  
34  
35  
36  
37  
38  
39  
40  
41  
42  
43  
44  
45  
46  
47  
48  
49

| Section/topic                      | #  | Checklist item                                                                                                                                                                                                                                                                                              | Reported on page # |
|------------------------------------|----|-------------------------------------------------------------------------------------------------------------------------------------------------------------------------------------------------------------------------------------------------------------------------------------------------------------|--------------------|
| <b>TITLE</b>                       |    |                                                                                                                                                                                                                                                                                                             |                    |
| Title                              | 1  | Identify the report as a systematic review, meta-analysis, or both.                                                                                                                                                                                                                                         | 1                  |
| <b>ABSTRACT</b>                    |    |                                                                                                                                                                                                                                                                                                             |                    |
| Structured summary                 | 2  | Provide a structured summary including, as applicable: background; objectives; data sources; study eligibility criteria, participants, and interventions; study appraisal and synthesis methods; results; limitations; conclusions and implications of key findings; systematic review registration number. | 3,4                |
| <b>INTRODUCTION</b>                |    |                                                                                                                                                                                                                                                                                                             |                    |
| Rationale                          | 3  | Describe the rationale for the review in the context of what is already known.                                                                                                                                                                                                                              | 5,6                |
| Objectives                         | 4  | Provide an explicit statement of questions being addressed with reference to participants, interventions, comparisons, outcomes, and study design (PICOS).                                                                                                                                                  | 6,7                |
| <b>METHODS</b>                     |    |                                                                                                                                                                                                                                                                                                             |                    |
| Protocol and registration          | 5  | Indicate if a review protocol exists, if and where it can be accessed (e.g., Web address), and, if available, provide registration information including registration number.                                                                                                                               | 7                  |
| Eligibility criteria               | 6  | Specify study characteristics (e.g., PICOS, length of follow-up) and report characteristics (e.g., years considered, language, publication status) used as criteria for eligibility, giving rationale.                                                                                                      | 8                  |
| Information sources                | 7  | Describe all information sources (e.g., databases with dates of coverage, contact with study authors to identify additional studies) in the search and date last searched.                                                                                                                                  | 9                  |
| Search                             | 8  | Present full electronic search strategy for at least one database, including any limits used, such that it could be repeated.                                                                                                                                                                               | 11                 |
| Study selection                    | 9  | State the process for selecting studies (i.e., screening, eligibility, included in systematic review, and, if applicable, included in the meta-analysis).                                                                                                                                                   | 9,12               |
| Data collection process            | 10 | Describe method of data extraction from reports (e.g., piloted forms, independently, in duplicate) and any processes for obtaining and confirming data from investigators.                                                                                                                                  | 12                 |
| Data items                         | 11 | List and define all variables for which data were sought (e.g., PICOS, funding sources) and any assumptions and simplifications made.                                                                                                                                                                       | 8,9                |
| Risk of bias in individual studies | 12 | Describe methods used for assessing risk of bias of individual studies (including specification of whether this was done at the study or outcome level), and how this information is to be used in any data synthesis.                                                                                      | 12                 |
| Summary measures                   | 13 | State the principal summary measures (e.g., risk ratio, difference in means).                                                                                                                                                                                                                               | 7                  |
| Synthesis of results               | 14 | Describe the methods of handling data and combining results of studies, if done, including measures of consistency (e.g., $I^2$ for each meta-analysis).                                                                                                                                                    | 12                 |



# PRISMA 2009 Checklist

Page 1 of 2

| Section/topic                 | #  | Checklist item                                                                                                                                                                                           | Reported on page # |
|-------------------------------|----|----------------------------------------------------------------------------------------------------------------------------------------------------------------------------------------------------------|--------------------|
| Risk of bias across studies   | 15 | Specify any assessment of risk of bias that may affect the cumulative evidence (e.g., publication bias, selective reporting within studies).                                                             | 12                 |
| Additional analyses           | 16 | Describe methods of additional analyses (e.g., sensitivity or subgroup analyses, meta-regression), if done, indicating which were pre-specified.                                                         | 12                 |
| <b>RESULTS</b>                |    |                                                                                                                                                                                                          |                    |
| Study selection               | 17 | Give numbers of studies screened, assessed for eligibility, and included in the review, with reasons for exclusions at each stage, ideally with a flow diagram.                                          | 12,13              |
| Study characteristics         | 18 | For each study, present characteristics for which data were extracted (e.g., study size, PICOS, follow-up period) and provide the citations.                                                             | 12,13              |
| Risk of bias within studies   | 19 | Present data on risk of bias of each study and, if available, any outcome level assessment (see item 12).                                                                                                | 13,14              |
| Results of individual studies | 20 | For all outcomes considered (benefits or harms), present, for each study: (a) simple summary data for each intervention group (b) effect estimates and confidence intervals, ideally with a forest plot. | 13-23              |
| Synthesis of results          | 21 | Present results of each meta-analysis done, including confidence intervals and measures of consistency.                                                                                                  |                    |
| Risk of bias across studies   | 22 | Present results of any assessment of risk of bias across studies (see Item 15).                                                                                                                          |                    |
| Additional analysis           | 23 | Give results of additional analyses, if done (e.g., sensitivity or subgroup analyses, meta-regression [see Item 16]).                                                                                    |                    |
| <b>DISCUSSION</b>             |    |                                                                                                                                                                                                          |                    |
| Summary of evidence           | 24 | Summarize the main findings including the strength of evidence for each main outcome; consider their relevance to key groups (e.g., healthcare providers, users, and policy makers).                     | 24-26              |
| Limitations                   | 25 | Discuss limitations at study and outcome level (e.g., risk of bias), and at review-level (e.g., incomplete retrieval of identified research, reporting bias).                                            | 26-27              |
| Conclusions                   | 26 | Provide a general interpretation of the results in the context of other evidence, and implications for future research.                                                                                  | 27                 |
| <b>FUNDING</b>                |    |                                                                                                                                                                                                          |                    |
| Funding                       | 27 | Describe sources of funding for the systematic review and other support (e.g., supply of data); role of funders for the systematic review.                                                               |                    |

From: Moher D, Liberati A, Tetzlaff J, Altman DG, The PRISMA Group (2009). Preferred Reporting Items for Systematic Reviews and Meta-Analyses: The PRISMA Statement. PLoS Med 6(6): e1000097. doi:10.1371/journal.pmed1000097

For more information, visit: [www.prisma-statement.org](http://www.prisma-statement.org).

Page 2 of 2

For peer review only - <http://bmjopen.bmj.com/site/about/guidelines.xhtml>

# BMJ Open

## Correlates of mobile screen media use among children aged 0-8: a systematic review

|                                 |                                                                                                                                                                                                                                                                                                                                                                                                                                                              |
|---------------------------------|--------------------------------------------------------------------------------------------------------------------------------------------------------------------------------------------------------------------------------------------------------------------------------------------------------------------------------------------------------------------------------------------------------------------------------------------------------------|
| Journal:                        | <i>BMJ Open</i>                                                                                                                                                                                                                                                                                                                                                                                                                                              |
| Manuscript ID                   | bmjopen-2016-014585.R2                                                                                                                                                                                                                                                                                                                                                                                                                                       |
| Article Type:                   | Research                                                                                                                                                                                                                                                                                                                                                                                                                                                     |
| Date Submitted by the Author:   | 20-Jun-2017                                                                                                                                                                                                                                                                                                                                                                                                                                                  |
| Complete List of Authors:       | Paudel, Susan; Curtin University School of Public Health, Jancey, Jonine; Curtin University, Collaboration for Evidence, Research and Impact in Public Health (CERIPH), School of Public Health Subedi, Narayan; Maharajgunj Medical Campus, Institute of Medicine, Department of Community Medicine and Public Health Leavy, Justine; Curtin University, Collaboration for Evidence, Research and Impact in Public Health (CERIPH), School of Public Health |
| <b>Primary Subject Heading</b>: | Public health                                                                                                                                                                                                                                                                                                                                                                                                                                                |
| Secondary Subject Heading:      | Epidemiology, Research methods                                                                                                                                                                                                                                                                                                                                                                                                                               |
| Keywords:                       | Children, Mobile media use, Screen time, Correlates, Systematic review                                                                                                                                                                                                                                                                                                                                                                                       |
|                                 |                                                                                                                                                                                                                                                                                                                                                                                                                                                              |

SCHOLARONE™  
Manuscripts

1  
2  
3  
4 1 **Title: Correlates of mobile screen media use among children aged 0-8:**  
5 2 **a systematic review**  
6  
7 3  
8

9  
10 4 Authors:

11  
12 5 Susan Paudel

13  
14 6 School of Public Health, Curtin University, Western Australia

15  
16  
17 7 [replysusan@gmail.com](mailto:replysusan@gmail.com)  
18

19  
20 8

21  
22 9 Dr. Jonine Jancey

23  
24 10 Collaboration for Evidence, Research and Impact in Public Health (CERIPH), School of  
25  
26 11 Public Health, Curtin University, Western Australia

27  
28  
29 12 [j.jancey@curtin.edu.au](mailto:j.jancey@curtin.edu.au)  
30

31  
32 13

33  
34 14 Narayan Subedi

35  
36 15 Department of Community Medicine and Public Health, Maharajgunj Medical Campus,  
37  
38 16 Institute of Medicine, Tribhuvan University

39  
40  
41 17 [subedi.narayan@gmail.com](mailto:subedi.narayan@gmail.com)  
42

43  
44 18

45  
46 19 Dr. Justine Leavy

47  
48 20 Collaboration for Evidence, Research and Impact in Public Health (CERIPH), School of  
49  
50 21 Public Health, Curtin University, Western Australia

51  
52  
53 22 [j.leavy@curtin.edu.au](mailto:j.leavy@curtin.edu.au)  
54

55  
56 23  
57  
58  
59  
60

1  
2  
3 1 **Corresponding author:**  
4

5  
6 2 Susan Paudel  
7

8 3 School of Public Health, Curtin University, Western Australia  
9

10 4 Email: [replysusan@gmail.com](mailto:replysusan@gmail.com)  
11

12 5 Contact no: 977-9843061616  
13  
14

15 6  
16

17 7 **Keywords:** Mobile screen media, children, systematic review, screen time, correlates  
18  
19

20 8  
21

22 9 Word Count: 5169  
23  
24

25 10  
26  
27

28 11  
29

30 12  
31

32 13  
33  
34  
35  
36  
37  
38  
39  
40  
41  
42  
43  
44  
45  
46  
47  
48  
49  
50  
51  
52  
53  
54  
55  
56  
57  
58  
59  
60

1  
2  
3 **1 Abstract**  
4

5  
6 **2 Objective:** This study is a systematic review of the peer-reviewed literature to identify the  
7  
8  
9 **3** correlates of mobile screen media use among children aged eight years and less.

10  
11 **4 Setting:** Home or community based studies were included in this review while child care or  
12  
13  
14 **5** school based studies were excluded.

15  
16  
17 **6 Participants:** Children aged eight years or less were the study population. Studies that  
18  
19  
20  
21 **7** included larger age-groups without sub-group analysis specific to the 0-8 year's category  
22  
23  
24 **8** were excluded. Eight electronic databases were searched for peer-reviewed English language  
25  
26  
27 **9** primary research articles published or in press between January 2009 and March 2017 that  
28  
29  
30 **10** have studied correlates of mobile screen media use in this age-group.

31  
32 **11 Outcome measure:** Mobile screen media use was the primary outcome measure. Mobile  
33  
34  
35  
36  
37 **12** screen media use refers to children's use of mobile screens, such as mobile phones, electronic  
38  
39  
40  
41  
42 **13** tablets, handheld computers or PDAs.

43  
44  
45 **14 Results**  
46

47  
48  
49  
50  
51  
52  
53  
54  
55  
56  
57  
58  
59  
60  
**15** Thirteen studies meeting the inclusion criteria were identified of which a total of 36  
**16** correlates were examined. Older children, children better skilled in using mobile screen  
**17** media devices, those having greater access to such devices at home and whose parents had  
**18** high mobile screen media use were more likely to have higher use of mobile screen media  
**19** devices. No association existed with parent's age, sex and education.

**20 Conclusion**

**21** Limited research has been undertaken into young children's mobile screen media use and  
**22** most of the variables have been studied too infrequently for robust conclusions to be reached.



1  
2  
3 1 Future studies with objective assessment of mobile screen media use and frequent  
4  
5 2 examination of the potential correlates across multiple studies and settings are recommended.  
6  
7

8  
9 3 **Review registration:** This review is registered with PROSPERO International Prospective  
10  
11 4 Register of Ongoing Systematic Reviews (registration number: CRD42015028028).  
12  
13

### 14 **Keywords**

15  
16  
17 6 Children, mobile screen media, screen time, correlates, systematic review  
18  
19

### 20 **Strengths**

- 21  
22  
23 8 • This review summarises current peer-reviewed literature on correlates of mobile  
24  
25 9 screen media use among children aged eight years and less.  
26  
27  
28 10 • A peer reviewed and published protocol paper guided the systematic review.  
29  
30 11 • The review incorporated a robust research strategy, that identified up-to-date key  
31  
32 12 words with the assistance of public health librarian; and searched eight relevant  
33  
34 13 databases  
35  
36 14 • A comprehensive inclusion and exclusion criteria was established and used.  
37  
38  
39

### 40 **Limitations**

- 41  
42 16 • All the reviewed studies were cross-sectional in design making it difficult to derive a  
43  
44 17 casual inference.  
45  
46 18 • Study sample sizes ranged from 149 to 3206, which may have impacted on the  
47  
48 19 findings.  
49  
50 20 • Association and consistency could not be determined in this review due to the study  
51  
52 21 findings being segregated across different mobile screen media types, making the  
53  
54 22 findings largely descriptive.  
55  
56  
57  
58  
59  
60

1  
2  
3  
4  
5  
6  
7  
8  
9  
10  
11  
12  
13  
14  
15  
16  
17  
18  
19  
20  
21  
22  
23  
24  
25  
26  
27  
28  
29  
30  
31  
32  
33  
34  
35  
36  
37  
38  
39  
40  
41  
42  
43  
44  
45  
46  
47  
48  
49  
50  
51  
52  
53  
54  
55  
56  
57  
58  
59  
60

1

For peer review only

## 1 BACKGROUND

2 Young children are increasingly exposed to multiple screens including both the traditional  
3 fixed screens, such as televisions and desktop computers and newer mobile screen media  
4 devices such as smartphones and electronic tablets (1). Specifically, there has been a rapid  
5 uptake of mobile screen media devices in recent years, among young children (2, 3). This is  
6 largely facilitated by the characteristics of handheld devices, their portability, screen size,  
7 decreasing cost, multiple applications and interactive ability (4, 5). Because of the increasing  
8 uptake and use of mobile screen media devices, the daily screen time of traditional media  
9 such as television has decreased (6) while the time spent on the former has increased,  
10 especially in many developed countries (4). Though television is still the dominant media for  
11 family time, children are increasingly using mobile screen media devices for focused solitary  
12 viewing (7). This increasing exposure and accessibility to mobile screen media devices has  
13 public health implications, for children's sedentary behaviour and play opportunities,  
14 especially considering the evidence that indicates childhood habits usually track into  
15 adulthood (8). Furthermore, the pleasure a child derives from interacting with these  
16 touchscreens may lead to increased and habitual use (9). Nevertheless, there are also some  
17 benefits associated with interactive mobile screen media devices use, such as learning  
18 opportunities and face-to face connections with distant family and friends and play  
19 opportunities (10, 11). Similarly, engagement with active video games have been reported to  
20 promote light to moderate physical activity (12).

21 Health guidelines recommend that children aged less than two should be exposed to a limited  
22 amount of educational mobile screen media use, while for those aged two-to-five, the daily  
23 screen time should be less than one hour (10, 13-15). However, worldwide a significant

1 proportion of young children are exceeding the recommended exposure time (5). For  
2 example, in an urban community in Philadelphia, USA, nearly half of one-year-old children  
3 were reportedly using mobile screen media devices on a daily basis, with use increasing with  
4 age (4). Surprisingly, 75% of children had their own mobile device by the age of four (4). It  
5 seems parents are increasingly allowing their young children to use mobile screen media  
6 devices, especially smartphones and electronic tablets, to keep them occupied when they are  
7 doing household chores or shopping, to calm children in public places and to put children to  
8 sleep (3, 4, 16).

9 Despite the increase in the use of mobile screen media devices such as smartphones,  
10 electronic tablets, handheld computers and Personal Digital Assistants (PDAs) by young  
11 children, very limited research has been carried out to identify the correlates associated with  
12 their increased use (4). Currently, screen time research is dominated by fixed screens with  
13 scant attention paid to mobile screen media devices (10). Systematic reviews to identify the  
14 correlates of mobile screen media use among young children are almost non-existent with  
15 previous reviews focussing on sedentary behaviours or television viewing (17-19).

16 Considering the increasing availability, ownership and use of mobile screen media devices  
17 (smartphones, electronic tablets, handheld computers, personal digital assistants (PDAs)  
18 among young children, identification of the correlates of mobile screen media use specific to  
19 children eight years and less is crucial. The purpose of this review was to systematically  
20 search and critically review the published peer-reviewed literature to identify the correlates  
21 of mobile screen media use among children eight years and less. Correlates are classified into  
22 proximal and distal factors using a bio-ecological model to facilitate comparison with the

1 existing literature (17, 20). The model provides a strong theoretical basis to understand  
2 human behaviour (21) and has been described in detail elsewhere (22).

### 3 **METHODS**

4 This systematic review is based on Preferred Reporting Items for Systematic Reviews and  
5 Meta-analyses (PRISMA) statement (23-25) and is registered with PROSPERO International  
6 Prospective Register of Ongoing Systematic Reviews (registration number:  
7 CRD42015028028). The study used already published, de-identified data and hence is  
8 exempt from the ethics approval process. A detailed description of the methods is available  
9 in the protocol article (22). As discussed in the protocol article, initially the database search  
10 was planned for articles published between 2009 and 2015 (22). However, considering the  
11 increasing number of articles studying mobile screen media recently, the search was  
12 extended to March 2017.

#### 13 ***Outcome measure***

14 Mobile screen media use was the primary outcome measure. Mobile screen media use refers  
15 to children's use of mobile screens, such as mobile phones, electronic tablets, handheld  
16 computers or PDAs. The term 'screen time' is used to denote both the fixed screens and  
17 mobile media screen device use. This terminology is used when referring to the screen time  
18 guidelines for children and to refer to other articles that have studied children's total screen  
19 time including both fixed and mobile screens.

20 Correlates of mobile screen media use have been placed into five categories as per the bio-  
21 ecological model (17, 18). The five categories are:

- 1  
2  
3 1 • *Child biological and demographic factors* includes age, sex and body mass index  
4  
5  
6 2 (BMI).  
7  
8 3 • *Family biological and demographic factors* includes demographic and biological  
9  
10 4 characteristics of the family members (particularly parents) and their education,  
11  
12 5 occupation and income.  
13  
14 6 • *Family structure factors* includes the number of siblings, family size and family type.  
15  
16 7 • *Behavioural factors* includes the child's behavioural characteristics and their skills  
17  
18 8 and attitudes.  
19  
20 9 • *Sociocultural/ environmental factors* includes social, physical and environmental  
21  
22 10 factors within the home setting and community, and parental behavioural factors such  
23  
24 11 as their screen media skills, beliefs and attitudes towards the mobile screen media and  
25  
26 12 self-efficacy to limit their children's screen viewing behaviours.  
27  
28  
29  
30  
31  
32  
33 13 Direction of association has been reviewed separately for: a) smartphones; b) electronic  
34  
35 14 tablets; c) touchscreens; and d) any media device (defined as the combination of traditional  
36  
37 15 media plus at least one other mobile screen media device).  
38  
39  
40

#### 41 ***Eligibility criteria***

42  
43  
44 17 The studies eligible for inclusion were peer-reviewed primary research articles with  
45  
46 18 information on mobile screen media use, parent-child co-use or adherence to screen time  
47  
48 19 guidelines as the outcome measure, that investigated the correlates of mobile screen media  
49  
50 20 use among children aged eight and less; based in home or community setting; and published,  
51  
52 21 or in press in English language journals between January 2009 to March 2017. The full  
53  
54  
55 22 description of the alignment of the research question to the Population, Exposure,  
56  
57  
58  
59  
60

1 Comparison and Outcome (PECO) format along with the exclusion criteria is presented in  
2 table 1.

3 **Table 1: Research question using PECO format**

| Criteria                | Description                                                                                                                                                                                                                                                                                                                                                                                                                                                                                                                                                                                                                                                                       |
|-------------------------|-----------------------------------------------------------------------------------------------------------------------------------------------------------------------------------------------------------------------------------------------------------------------------------------------------------------------------------------------------------------------------------------------------------------------------------------------------------------------------------------------------------------------------------------------------------------------------------------------------------------------------------------------------------------------------------|
| <b>P: Population</b>    | Children aged eight years and less                                                                                                                                                                                                                                                                                                                                                                                                                                                                                                                                                                                                                                                |
| <b>E: Exposure</b>      | Correlates of mobile screen media use                                                                                                                                                                                                                                                                                                                                                                                                                                                                                                                                                                                                                                             |
| <b>C: Comparison</b>    | With vs. without the correlates                                                                                                                                                                                                                                                                                                                                                                                                                                                                                                                                                                                                                                                   |
| <b>O: Outcome</b>       | Use of mobile screen media (e.g. mobile phones, electronic tablets, handheld computers, PDAs),                                                                                                                                                                                                                                                                                                                                                                                                                                                                                                                                                                                    |
| <b>Types of studies</b> | Quantitative studies using all designs (cross-sectional, case-control, cohort and intervention studies)                                                                                                                                                                                                                                                                                                                                                                                                                                                                                                                                                                           |
| <b>Exclusion</b>        | <p>Studies that have not reported correlates of mobile screen media use</p> <p>Studies that have not included at least one form of mobile screen media device</p> <p>Systematic reviews and meta-analysis</p> <p>Grey literature</p> <p>Qualitative studies</p> <p>Studies carried out in settings other than home or community</p> <p>Studies carried out among unhealthy participants</p> <p>Studies with broader age-groups and no sub-group analysis for the target group</p> <p>Papers published before 2009 to March 2017</p> <p>Papers published in language other than English</p> <p>Non-peer reviewed articles</p> <p>Studies involving children older than 8 years</p> |

4  
5 ***Search strategy and study selection***

6 Eight electronic databases: Medline, Scopus, Embase, CINAHL Plus, Pubmed, ProQuest,  
7 PsycINFO and Web of Science were searched for articles published between January 2009  
8 and March 2017. Child related keywords including child\*, preschool, infant, kid and toddler  
9 and screen related keywords including screen time, screen viewing, mobile phone, cell

1  
2  
3 1 phone, smartphone\*, PDA, tablet\*, iPad\*, handheld media, handheld computer\* were used to  
4  
5  
6 2 locate potential papers in the databases. The search was carried out during September-  
7  
8 3 October 2015 and replicated in March 2017. The search commenced with Medline and the  
9  
10 4 identified papers were excluded when searching other databases. However, only Embase,  
11  
12 5 ProQuest and CINAHL Plus provided that option. Duplicate records were manually removed  
13  
14 6 after compiling all the searches. The search strategy used in Medline database is presented in  
15  
16 7 Table 2. A total of 1909 articles were identified through searching the eight databases. To  
17  
18 8 ensure that all relevant articles were identified, a manual search of the reference lists of the  
19  
20 9 systematic reviews was also carried out along with the checking of the *Google Scholar*  
21  
22 10 profile of authors with frequent publication in this field. A total of seven papers were  
23  
24 11 retrieved from the manual searching process.

25  
26  
27  
28  
29  
30 12 Endnote (version X7.5) software was used for managing all the identified articles (n=1916).  
31  
32 13 Duplicate articles (n= 376) were removed. The remaining articles (n=1540) were then  
33  
34 14 screened by title by two authors (SP and NS). From this, irrelevant titles (n=1029) were  
35  
36 15 excluded. The abstract of the remaining articles (n= 511) were also reviewed by SP and NS;  
37  
38 16 and a further 427 articles were excluded. Full texts of the remaining articles (n=84) were  
39  
40 17 retrieved and reviewed by all the four researchers (SP, NS, JJ and JL) against the  
41  
42 18 inclusion/exclusion criteria, resulting in 13 papers being included in this systematic review.  
43  
44 19 The authors of this systematic review were not blinded to the name, journal title or  
45  
46 20 institutional affiliation of the authors of the articles selected. The process of study selection  
47  
48 21 has been presented using the PRISMA flow-diagram in Figure 1.  
49  
50  
51  
52  
53  
54  
55  
56  
57  
58 22  
59  
60 23



1 **Table 2: Search strategy used in Medline database**

Database: Ovid Medline (R) 1946 to March 2017

| SN | Search strategy                                                                                                                                                                           | Results |
|----|-------------------------------------------------------------------------------------------------------------------------------------------------------------------------------------------|---------|
| 1  | Only Child/ or Child/ or child.mp. or Child, Preschool/                                                                                                                                   | 1767004 |
| 2  | Infant/ or infant.mp.                                                                                                                                                                     | 1030660 |
| 3  | Kid.mp.                                                                                                                                                                                   | 1251    |
| 4  | Toddler.mp.                                                                                                                                                                               | 2240    |
| 5  | 1 or 2 or 3 or 4                                                                                                                                                                          | 2242988 |
| 6  | Screen time.mp.                                                                                                                                                                           | 639     |
| 7  | Smartphones.mp. or Cell Phones/                                                                                                                                                           | 5961    |
| 8  | Mobile phones.mp.                                                                                                                                                                         | 1627    |
| 9  | Handheld computers.mp. or Computers, Handheld/                                                                                                                                            | 2721    |
| 10 | Smartboard.mp.                                                                                                                                                                            | 2       |
| 11 | PDA.mp.                                                                                                                                                                                   | 5860    |
| 12 | Screen media.mp.                                                                                                                                                                          | 42      |
| 13 | Mobile screen.mp.                                                                                                                                                                         | 5       |
| 14 | Microcomputers/ or Computers, Handheld/ or electronic tablets.mp.                                                                                                                         | 16724   |
| 15 | Tablets/ or Tablets.mp.                                                                                                                                                                   | 34967   |
| 16 | Mobile Applications/ or iPads.mp.                                                                                                                                                         | 699     |
| 17 | Handheld media.mp.                                                                                                                                                                        | 1       |
| 18 | Touchscreens.mp.                                                                                                                                                                          | 22      |
| 19 | Mobile devices.mp.                                                                                                                                                                        | 552     |
| 20 | Digital technology.mp.                                                                                                                                                                    | 348     |
| 21 | 6 or 7 or 8 or 9 or 10 or 11 or 12 or 13 or 14 or 15 or 16 or 17 or 18 or 19 or 20                                                                                                        | 64324   |
| 22 | 5 and 21                                                                                                                                                                                  | 6648    |
| 23 | ("Screen-viewing" or "screen time" or "mobile use" or "use of smartphones" or "Cell phone use" or "increased screen time" or "use of electronic tablets" or " use of mobile screens").mp. | 965     |
| 24 | 5 and 21 and 23                                                                                                                                                                           | 525     |
| 25 | Limit 24 to (English language and humans and yr="2009 -Current" and "all child (0 to 18 years)")                                                                                          | 482     |

2 \* Sign denotes for any character(s), SN= Serial number, mp=title, abstract, original title, name of  
 3 substance word, subject heading word, keyword heading word, protocol supplementary concept word,  
 4 rare disease supplementary concept word, unique identifier

5

### 1 *Assessment of included papers*

2 A modified version of the checklist by Downs and Black (26) was used to assess the quality  
3 of studies and the risk of bias. Out of 27 suggested checklist items, relevant items in the  
4 themes of reporting (questions 1-3, 6, 7, 10), external validity (questions 11, 12) and internal  
5 validity-bias (questions 18, 20) were considered appropriate for this review. A score of '1'  
6 was allocated for 'Yes' and a score of '0' was allocated for 'No' and 'Unable to determine'.  
7 Out of a possible score of 10, a total score greater than 5 indicated a quality paper. Three  
8 researchers (SP, JJ and JL) independently carried out the appraisal using the checklist and the  
9 final quality score was ascertained by comparing each of their scores. Discrepancies in scores  
10 were re-assessed jointly, and a consensus reached.

### 11 *Data extraction and management*

12 In order to maintain consistency and avoid bias, a data extraction table was developed.  
13 Information on study design, country of study, age-group of participants, sample size, main  
14 outcome variables, correlates and measures of association was extracted by one author (SP).  
15 Mean duration of screen-viewing specific to individual devices was also extracted when  
16 available. Adjusted Odds Ratio (AOR) and Standardised Coefficients (SC) were extracted in  
17 order to establish the correlates. Since there were few studies that assessed a particular  
18 variable, association and consistency could not be determined.

## 19 **RESULTS**

### 20 *Study characteristics*

1  
2  
3  
4  
5  
6  
7  
8  
9  
10  
11  
12  
13  
14  
15  
16  
17  
18  
19  
20  
21  
22  
23  
24  
25  
26  
27  
28  
29  
30  
31  
32  
33  
34  
35  
36  
37  
38  
39  
40  
41  
42  
43  
44  
45  
46  
47  
48  
49  
50  
51  
52  
53  
54  
55  
56  
57  
58  
59  
60

1 Thirteen studies published between 2013 and 2017 were included in the review. Six were  
2 published in 2015 (1, 27-31), four in 2016 (32-35) and one in 2014 (36), 2013 (37) and 2017  
3 (38). The majority of the eligible studies were conducted in high-income countries with four  
4 from the USA (1, 27, 31, 33), three from the United Kingdom (28, 29, 37), two from Canada  
5 (34, 38) and one from the Netherlands (30), Hong Kong (36), Malaysia (32) and Czech  
6 Republic (35). All 13 studies were cross-sectional in design. The studies quality scores  
7 ranged from 6 to 10 with a mean score of 7.85, indicating all were considered quality studies.  
8 The study sample sizes ranged from n=149 to n=3206. Two studies reported using weighted  
9 data to be representative of the national population (1, 31), two studies used random  
10 sampling (34, 35), one used stratified random sampling (32), while all other studies used  
11 non-representative techniques (27-30, 33, 36-38). The mean age of participants was clearly  
12 stated in eight studies (28, 30-35, 38) while four provided frequencies in different age-groups  
13 (27, 29, 36, 37). However, Connell et. al. (1) did not report children's mean age. Based on  
14 the available data, the mean age of the children was (4.74 ± 1.72) years. The descriptive  
15 characteristics of the included studies are presented in Table 3.

#### 16 ***Mobile screen media use***

17 Eleven studies reported screen viewing as the outcome measure (28-38), one reported  
18 adherence to the American Academy of Paediatrics (AAP) screen time guidelines (27) and  
19 one reported parent-child co-use of media (1).

20 Children's mobile screen media use in all 13 studies was measured by parental self-report.  
21 One paper reported face validity, content validity and test-retest reliability of the instrument  
22 used (36) and five of the research questionnaires had been used in previous studies (1, 27,

1  
2  
3 1 31, 32, 38). Three studies stated parental-proxy reports as having reasonable reliability and  
4  
5 2 validity to measure children's mobile screen media use (28, 29, 37). Whilst, the other studies  
6  
7 3 did not report on the reliability and validity of their instrument (30, 33-35). Overall, the mean  
8  
9 4 duration of mobile screen media use could not be determined as only five studies reported the  
10  
11 5 average duration (27, 30-32, 35), while all other studies categorised participants into groups,  
12  
13 6 such as less than 2 hours and more than 2 hours of screen media use (1, 28, 29, 33, 34, 36-  
14  
15 7 38).  
16  
17  
18  
19

### 20 8 *Device use and correlates*

21  
22  
23 9 In total, 36 correlates of mobile screen media use were studied. Of these correlates,  
24  
25 10 children's age was reported eight times, parental media use (fixed and mobile screens) seven  
26  
27 11 times, family income five times, and three variables (child sex, parental age and education)  
28  
29 12 four times, The remaining correlates were studied even fewer times (See table 4 and 5).  
30  
31

32  
33 13 Association and consistency of the variables could not be determined as a majority of the  
34  
35 14 variables were studied in less than three studies.  
36  
37

38  
39 15 Four studies reported an association specific to smart phones (1, 29, 31, 37) and electronic  
40  
41 16 tablets (1, 28, 31, 33). Nikken et. al. (30) reported combined results for touchscreens  
42  
43 17 (smartphones and electronic tablets) while the other six studies reported correlates for  
44  
45 18 electronic media, that included both traditional (e.g. televisions, computers) and new devices  
46  
47 19 (e.g. mobile phones and electronic tablets) (27, 32, 34-36, 38). Use of a PDA was not  
48  
49 20 studied.  
50  
51

### 52 21 **Correlates of mobile media use**

### 53 22 *Child biological and demographic factors*

1  
2  
3 1 Six of the eight studies (75%) reported a positive association between the child's age and  
4  
5 2 mobile screen media use (27, 31, 33, 34, 36, 38) (Table 4). Older children were more likely  
6  
7 3 to use smartphones, tablets or any media compared to younger children (27, 31, 33, 34, 36,  
8  
9 4 38). Carson and colleagues concluded that for every one month increase in age, the use of  
10  
11 5 any media increased by 9.3 minutes per day (95% CI: 2.8-15.8) (38). However, Connell et.  
12  
13 6 al. examined parent-child co-use of smartphones and electronic tablets and reported an  
14  
15 7 inverse association, indicating older children were less likely to co-use with parents (1). In  
16  
17 8 contrast, Nikken et. al. (30) concluded that the child's age had no significant association with  
18  
19 9 the use of touchscreens. Females were more likely to use any media for a longer duration  
20  
21 10 than their male counterparts (32, 38) but there was no association with sex specifically in  
22  
23 11 regard to touchscreen use (1, 30) . No association was found between the use of any media  
24  
25 12 and child body mass index (BMI) (27).  
26  
27  
28  
29  
30  
31  
32  
33  
34  
35  
36  
37  
38  
39  
40  
41  
42  
43  
44  
45  
46  
47  
48  
49  
50  
51  
52  
53  
54  
55  
56  
57  
58  
59  
60

1

**Table 3: Description of included studies**

| S.N | Author                 | Year | Country        | Study design    | Sample size | Age group                  | Outcome measure                  | Screen studied                                                                                   | Results specific to                               | Independent variables                                                                                                                    | Measure of association                                       | Quality score |
|-----|------------------------|------|----------------|-----------------|-------------|----------------------------|----------------------------------|--------------------------------------------------------------------------------------------------|---------------------------------------------------|------------------------------------------------------------------------------------------------------------------------------------------|--------------------------------------------------------------|---------------|
| 1   | Carson et. al (38).    | 2017 | Canada         | Cross-sectional | 149         | 12–35 months               | Children's screen-time           | Television, videos, or DVDs on a television, computer, or portable device.                       | Electronic media (fixed and mobile screens)       | Parental and child demographics                                                                                                          | unstandardized beta coefficients and 95% confidence interval | 8             |
| 2   | Lee et. al. (32)       | 2016 | Malaysia       | Cross-sectional | 835         | 4-6 years                  | Children's screen-time           | watching television or video, or playing with computer, smartphones, or other electronic gadgets | Electronic media (fixed and mobile screens)       | Parental and child demographics, places for play, barriers and motivators for active play                                                | P-value from chi-square test                                 | 7             |
| 3   | Pempek et. al. (33)    | 2016 | US             | Cross-sectional | 358         | 12-48 months               | Children and mother's tablet use | Electronic tablets                                                                               | Electronic tablets                                | Child age, Mother's tablet use, income, education, personal well-being and age                                                           | Standardised coefficients                                    | 7             |
| 4   | Pyper et. al. (34)     | 2016 | Canada         | Cross-sectional | 3206        | Under 18/screen time: 1-18 | Children's screen-time           | Television, DVD player; computer or laptop; tablet or iPad®; and video game console              | Electronic media (fixed and mobile screens)       | Different types of parental support behaviours (motivational, instrumental, regulatory and conditional), parental and child demographics | Odds ratio and 95% Confidence interval                       | 10            |
| 5   | Sigmund et. al. (35)   | 2016 | Czech Republic | Cross-sectional | 197         | 4-7 years                  | Children's screen-time           | watching TV (DVD, video) and PC (notebook, tablet, smartphone)                                   | Electronic media (fixed and mobile screens)       | Days of week, parental step count and screen time                                                                                        | Pearson correlations with 95% confidence intervals           | 8             |
| 6   | Nikken et al. (30)     | 2015 | Netherlands    | Cross-sectional | 896         | 0-7 years                  | Media ownership and use          | TV, game consoles, computers and touchscreens                                                    | Touchscreens (smartphones and electronic tablets) | Parent and child characteristics (age, access, concerns about media use)                                                                 | Standardised coefficients                                    | 6             |
| 7   | Lauricella et al. (31) | 2015 | US             | Cross-sectional | 2300        | 0-8 years                  | Children's screen time           | Television, computers, smartphones, and tablets                                                  | Smartphones and electronic tablets                | Parental media use, parental attitudes, child's age                                                                                      | Standardised coefficients                                    | 8             |
| 8   | Connell                | 2015 | US             | Cross-          | 2326        | 0-8 years                  | Parent-                          | Books, TV,                                                                                       | Smartphones                                       | Parent's time with child,                                                                                                                | Standardised                                                 | 7             |

|    |                    |      |           |                 |     |           |                                             |                                                                      |                                             |                                                                                                              |                                        |   |
|----|--------------------|------|-----------|-----------------|-----|-----------|---------------------------------------------|----------------------------------------------------------------------|---------------------------------------------|--------------------------------------------------------------------------------------------------------------|----------------------------------------|---|
|    | et. al. (1)        |      |           | sectional       |     |           | child co-use of media                       | computers, video games, tablets, and smartphones                     | And electronic tablets                      | parent's media use, parental and child demographics                                                          | coefficients                           |   |
| 9  | Kesten et al. (29) | 2015 | UK        | Cross-sectional | 735 | 6-8 years | Children's screen-time                      | TV, computer, smartphone, game-console and multi-SV                  | Smartphones                                 | Parent's employment, education, number and sex of children, screen related limits                            | Odds ratio and 95% Confidence interval | 8 |
| 10 | Jago et al. (28)   | 2015 | UK        | Cross-sectional | 954 | 5-6 years | Children's screen-time                      | TV, computer/laptop use including tablets                            | Electronic tablets                          | Parenting styles and parental self-efficacy to limit screen time                                             | Odds ratio and 95% Confidence interval | 8 |
| 11 | Asplund et al.(27) | 2015 | US        | Cross-sectional | 314 | 0-5 years | Adherence to AAP guidelines for screen time | TV, video games, computers, cell phones and other electronic devices | Electronic media (fixed and mobile screens) | Child BMI, child/parent demographics, and household media environment, parental attitudes towards TV viewing | Odds ratio and 95% Confidence interval | 9 |
| 12 | Wu et al. (36)     | 2014 | Hong Kong | Cross-sectional | 202 | 3-6 years | Use of digital products                     | Television, digital tablets, smart phones, etc                       | Electronic media (fixed and mobile screens) | Participants' demographics, parenting approach (restrictive, instructive and co-using)                       | P-value from chi-square test           | 8 |
| 13 | Jago et al. (37)   | 2013 | UK        | Cross-sectional | 750 | 6-8 years | Children's screen-time                      | TV, game console, smart-phone and multiscreen-viewing                | Smartphones                                 | Parental media use, parental attitudes and access to media equipment                                         | Odds ratio and 95% Confidence interval | 8 |

**Table 4: Demographic and biological correlates of mobile screen media use and direction of association**

| Variable type                                    | Variables                           | Smartphones    |       | Tablets     |            | Touchscreens |       | Any media device                |                  |      |
|--------------------------------------------------|-------------------------------------|----------------|-------|-------------|------------|--------------|-------|---------------------------------|------------------|------|
|                                                  |                                     | Association    | Study | Association | Study      | Association  | Study | Association                     | Study            |      |
| <b>Child biological and demographic factors</b>  | Child age                           | +              | (31)  | +           | (31, 33)   | 0            | (30)  | +                               | (27, 34, 36, 38) |      |
|                                                  |                                     | - (co-use)     | (1)   | - (co-use)  | (1)        |              |       |                                 |                  |      |
|                                                  | Child sex (0= boy)                  | 0              | (1)   | 0           | (1)        | 0            | (30)  | +                               | (32, 38)         |      |
|                                                  | BMI                                 |                |       |             |            |              |       | 0                               | (27)             |      |
| <b>Family biological and demographic factors</b> | Parental age                        | 0              | (1)   | 0           | (1, 33)    |              |       | 0                               | (27)             |      |
|                                                  |                                     |                |       |             |            |              |       | -                               | (36)             |      |
|                                                  | Parent's sex (0 = father)           | 0              | (1)   | 0           | (1)        | 0            | (30)  |                                 |                  |      |
|                                                  | Family income                       |                |       |             | 0          | (33)         | +     | (30)                            | 0                | (32) |
|                                                  |                                     |                |       |             |            |              |       |                                 | +                | (38) |
|                                                  |                                     |                |       |             |            |              |       |                                 | -                | (36) |
|                                                  | Parent's occupation (0= unemployed) |                |       |             |            |              |       | -                               | (36)             |      |
|                                                  | Parent's education                  | 0              | (1)   | 0           | (1, 33)    | 0            | (30)  | 0                               | (32)             |      |
| Language                                         |                                     |                |       |             |            |              | 0     | (27)                            |                  |      |
|                                                  |                                     |                |       |             |            |              | 0     | (27)                            |                  |      |
| Race/Ethnicity                                   | +                                   | (Non-Hispanic) | (1)   | +           | (Hispanic) | (1)          |       | - (European-Canadian-Caucasian) | (32)             |      |
| Country of birth                                 |                                     |                |       |             |            |              | 0     | (32, 38)                        |                  |      |
| <b>Family structure factors</b>                  | Family size                         |                |       |             |            | 0            | (30)  |                                 |                  |      |
|                                                  | Number of children in the family    |                |       |             |            |              |       | +                               | (36)             |      |

Note: '+' denotes Positive association, '-' denotes Negative association, '0' denotes No association (significant at 95% confidence level, p<0.05), Empty cells denote that association for that variable has not been studied, '( )' denotes reference. Touchscreens includes combined results for smartphones and tablets while any media includes combination of traditional media with at least one form of mobile screen media devices.



### 1 ***Family biological and demographic factors***

2 Four studies reported an association between parental age and their children's mobile screen  
3 media use (1, 27, 33, 36) (see Table 4). Of these, three reported no statistically significant  
4 association (1, 27), while Wu et. al. found a negative association, indicating that screen devices  
5 (both fixed and mobile screens) were more frequently used by children with younger parents  
6 (36).

7 Mixed associations were found between family income and children's mobile screen media use  
8 (see Table 4). Two studies (30, 38) reported a positive association, indicating that children from  
9 high-income families were using touchscreens or any media device longer than those from low-  
10 income families. Conversely, studies by Pempek et. al.(33) and Lee et. al.(32) found no  
11 association with family income, and Wu et. al. (36) reported a negative association. Wu also  
12 found a negative association between parent's occupational status and children's mobile screen  
13 media use (36). Furthermore children of stay-at-home parents used screen devices more  
14 frequently than those whose parents were employed (36).

15 No association was identified between young children's smartphone, electronic tablet or any  
16 touchscreen use and parent's sex (1, 30). Similarly, parent's educational status (1, 30, 32, 33),  
17 country of birth (38) and language (27) did not show any significant association with children's  
18 mobile screen media use.

### 19 ***Family structure factors***

20 Two studies reported family factors associated with children's mobile screen media use (30, 36)  
21 (Table 4). A positive association was reported between the number of children and use of

1  
2  
3 22 televisions, computers, tablets and mobile phones (36), and when there were two or more  
4  
5 23 children, they were more likely to use screen devices (both fixed and mobile screens) for talking  
6  
7  
8 24 with friends compared to those families with one child (36).  
9

### 10 11 ***Behavioural factors*** 12

13  
14 26 Ability or skill of children to use mobile screen media devices was the only behavioural skill  
15  
16 27 studied and was found to have a positive association with frequency and duration of device use  
17  
18 28 (30) (see Table 5). Furthermore, children who were better skilled in using mobile screen media  
19  
20 29 devices had greater access to these devices in their bedrooms and spent more time on them than  
21  
22 30 less-skilled children (30).  
23  
24

### 25 26 27 ***Sociocultural/ environmental factors*** 28

29  
30 32 In total, 21 sociocultural/environmental correlates were investigated (see Table 5). Parental  
31  
32 33 screen time/media use (both mobile and fixed screens) was the most studied variable (1, 27, 30,  
33  
34 34 31, 33, 35, 37). Two studies concluded that there was no statistically significant association  
35  
36 35 between parental smartphone use and their children's use (1, 37). Positive associations have also  
37  
38 36 been reported for parental screen time and children's use of tablets, touchscreen devices or any  
39  
40 37 media (1, 27, 30, 31, 33, 35). Sigmund et. al. concluded that the association between parental and  
41  
42 38 children any media use was stronger during weekends than on weekdays (35).  
43  
44

45  
46  
47 39 Parental attitudes about the effects of mobile screen media on children were positively associated  
48  
49 40 with smartphone and electronic tablet use for older young children (4-8 years) (31). More  
50  
51 41 positive parental attitudes towards these devices resulted in greater use by the children (31).  
52  
53  
54 42 Similarly, parental belief in the negative effects of mobile screen media screen devices, was  
55  
56  
57  
58  
59  
60

1  
2  
3 43 not associated with children's use of these devices (30). However, children were more likely to  
4  
5  
6 44 use mobile screen media devices when parents believed that these devices were helpful as a  
7  
8 45 behavioural regulation tool (30), while parental nurturing and self-efficacy to limit mobile media  
9  
10 46 use were negatively associated with electronic tablet use (28).  
11  
12

13 47 Children in parental care were more likely to have higher any media use than children in child  
14  
15 48 care (38). Similarly, any media use was higher during weekends than weekdays (35). The number  
16  
17 49 of media devices at home, and in the child's bedroom were positively associated with increased  
18  
19 50 smartphone use (37). Jago et. al. (37) concluded that the greater the number of devices, the  
20  
21 51 greater the use, while Asplund et. al. (27) reported no such association.  
22  
23  
24  
25  
26 52  
27  
28  
29  
30  
31  
32  
33  
34  
35  
36  
37  
38  
39  
40  
41  
42  
43  
44  
45  
46  
47  
48  
49  
50  
51  
52  
53  
54  
55  
56  
57  
58  
59  
60

1 Table 5: Environmental and behavioural correlates of mobile screen media use and direction of association

| Variable type                               | Variables                                                               | Smartphones |          | Tablets  |              | Touchscreens |       | Any media device |               |                    |
|---------------------------------------------|-------------------------------------------------------------------------|-------------|----------|----------|--------------|--------------|-------|------------------|---------------|--------------------|
|                                             |                                                                         | Assoc       | Study    | Assoc    | Study        | Assoc        | Study | Assoc            | Study         |                    |
| <b>Behavioural factors</b>                  | Child media skills                                                      |             |          |          |              | +            | (30)  |                  |               |                    |
| <b>Sociocultural/ environmental factors</b> | Parental media use/screen time                                          | +           | (>2 yrs) | (31)     | +            | (1, 31, 33)  | +     | (30)             | +             | (27) (≥2 yrs) (35) |
|                                             |                                                                         | 0           |          | (1, 37)  |              |              |       |                  |               |                    |
|                                             | Parent attitudes on effects of media on children                        | +           | (>6 yrs) | (31)     | +            | (>2 yrs)     | (31)  |                  |               |                    |
|                                             | Parental belief that media has positive effects on children             | 0           |          | (37)     |              |              | 0     | (30)             |               |                    |
|                                             | Parental belief that media has negative effects on children             |             |          |          |              |              | 0     | (30)             |               |                    |
|                                             | Parents belief on pacifying nature of media                             |             |          |          |              |              | +     | (30)             |               |                    |
|                                             | Parents belief that media are too complicated for young children to use |             |          |          |              |              | 0     | (30)             |               |                    |
|                                             | Parent's time with child                                                | 0           |          | (1)      | 0            | (1)          |       |                  |               |                    |
|                                             | Parental limit setting on media use                                     |             | 0        |          | (29) (boys)  |              |       |                  |               |                    |
|                                             |                                                                         |             | +        | (always) | (29) (girls) |              |       |                  |               |                    |
|                                             | Collaborative rule setting                                              | 0           |          | (29)     |              |              |       |                  |               |                    |
|                                             | Parental control on media use                                           |             |          |          | 0            | (28)         |       |                  |               |                    |
|                                             | Parental nurturance                                                     |             |          |          | -            | (28)         |       |                  |               |                    |
|                                             | Parental self-efficacy                                                  |             |          |          | -            | (28)         |       |                  |               |                    |
|                                             | Type of child care (0= parental care)                                   |             |          |          |              |              |       |                  | -             | (38)               |
|                                             | Mother's relational well-being                                          |             |          |          | 0            | (33)         |       |                  |               |                    |
|                                             | Mother's personal well-being                                            |             |          |          | 0            | (33)         |       |                  |               |                    |
|                                             | Days of week (0=Weekdays)                                               |             |          |          |              |              |       |                  | +             | (35)               |
| Parental step count/physical activity       |                                                                         |             |          |          |              |              |       | -                | (35)          |                    |
| TV on during dinner                         |                                                                         |             |          |          |              |              |       | +                | (27) (≥2 yrs) |                    |
| Number of TVs/screens at home               | +                                                                       |             | (37)     |          |              |              |       | 0                | (27)          |                    |

|  |                                         |   |      |  |  |  |  |  |   |      |
|--|-----------------------------------------|---|------|--|--|--|--|--|---|------|
|  | Computer's outside children's bedroom   |   |      |  |  |  |  |  | + | (36) |
|  | Screen viewing items in child's bedroom | + | (37) |  |  |  |  |  |   |      |

1 Note: '+' denotes Positive association, '-' denotes Negative association, '0' denotes No association (significant at 95% confidence level, p<0.05),  
 2 Empty cells denote that association for that variable has not been studied, '( )' denotes reference.  
 3 Touchscreens includes combined results for smartphones and tablets while any media includes combination of traditional media with at least one form of mobile screen  
 4 media devices.

For peer review only

## 1 DISCUSSION

2 This systematic review identified 36 reported correlates of mobile screen media use among  
3 children aged eight years or less from thirteen studies. Although this review searched for  
4 eligible articles published between 2009 and 2017, the included studies were published  
5 between 2013 and 2017, indicating limited but recent and increasing interest in mobile screen  
6 media use related research.

7 This review found that children aged between four and eight years were more likely to have  
8 higher mobile screen media use. Similarly, those who were better skilled in using the devices,  
9 had more access to media devices at home, and higher parental use of mobile screen media  
10 were more likely to have higher mobile screen media use. The bio-ecological model posits  
11 that human behaviour is affected by intrapersonal factors, inter-personal factors and distal  
12 factors which interact to shape our behaviour (21, 39), however, the findings of this review  
13 suggest that in the case of children aged eight years and less, distal factors such as parental  
14 behaviours, and the home environment can be more influential in shaping their behaviour.

15 The majority of studies in this review reported a positive association between the child's age  
16 and their mobile screen media use. Older children were more likely to use mobile screen  
17 media devices compared to their younger counterparts. This finding is consistent with a  
18 systematic review of traditional screen time use among children three years and younger (17).  
19 Potential reasons for increased mobile screen media use with increasing age include: greater  
20 access/ownership of these devices; decreased parental control and media use rules; and  
21 greater skills as a child ages (40, 41). Studies have found that parents tend to set more rules  
22 regarding screen time for younger children (40) and report that supervising the use of these  
23 devices becomes more difficult as the age of children increases (7). This suggests childhood

1 screen habits are reflected in adolescence and adulthood (8), and highlights the importance  
2 of managing mobile screen media use with younger children.

3 Higher mobile screen media use by older children in the family has influence on younger  
4 siblings. One study in the review reported households with more than one child used screen  
5 devices (both fixed and mobile screens) more frequently (36), which could be the result of  
6 younger children observing and modelling the behaviour of older siblings. Of interest, role  
7 modelling either by parents or older siblings has been used effectively in other areas to  
8 influence children's behaviours (42, 43), and could be an important strategy to decrease  
9 young children's mobile media use.

10 This review found no association between child's BMI and mobile screen media use. In  
11 contrast to this, a prospective study carried out in Finland reported that the increase in screen  
12 time during a two year follow up period was smaller for children who had lower BMI at 13  
13 months (44), while a previous research reported a positive association between TV viewing  
14 and being overweight but no association with computer use (45).

15 Mixed results in regards to parental age and children's mobile screen media use were  
16 reported. Three studies reported no association (1, 27, 33), while Wu et. al. found a negative  
17 association, indicating higher any media use among children of younger parents (36). A  
18 prospective study carried out in Finland has also found that the increase in the screen time  
19 was smaller when the mother was younger (44) while previous systematic reviews on  
20 traditional media have reported an unclear association with their use and parental age (17-19).  
21 Parents who used mobile screen media were more likely to have children who used these  
22 devices and for a longer time (1, 27, 30, 31). Furthermore, children of families who watch  
23 more TV are more likely to engage in higher screen-viewing (17, 19, 46-48). Therefore,

1 children of parents with higher mobile screen media use may be more likely to have higher  
2 use due to parent role-modelling, thus being considered 'normal behaviour' (49).

3 Parent-child co-use of mobile screen media was highest for children younger than two years  
4 and decreased as the child aged (1). This may be due to younger children being less able to  
5 manipulate technology or inability to unlock password protected devices and therefore  
6 requiring parental support to operate the device. Furthermore, younger children may spend  
7 more time at home with their parents, providing more opportunities for parent-child co-use  
8 (1). It should be noted, that decreased co-use with increasing age of children reduces  
9 monitoring opportunities for parents.

10 The review found, children of stay-at-home parents had higher mobile screen media use (36).  
11 This suggests parents could be more engaged in screen-viewing, providing a supportive  
12 environment for mobile screen media use for their children. Conversely self-reported data,  
13 from employed parents might under-report their children's media use. Other systematic  
14 reviews focusing on children's traditional screen time report that parental occupation is rarely  
15 studied, thus it is difficult to draw any specific conclusion (17, 18). This is an area worthy of  
16 future research as parents working long hours or bringing their work home may minimise  
17 monitoring of children's mobile screen media habits.

18 Mixed associations were found between family income and children's mobile screen media  
19 use. Children from high-income families were using touchscreens for longer durations than  
20 those from low-income families (30), which may be due to greater ownership and access to  
21 touchscreen devices in these households. Conversely, a study on electronic media use (both  
22 fixed and mobile screens) concluded no association between family income and children's  
23 screen time (50), while, the number of media devices at home, and in the child's bedroom  
24 were positively associated with mobile screen media use (37), which is consistent with other



1 studies (51, 52). It seems that when these devices are in the bedroom, children have easy  
2 access and autonomy to use them, ultimately leading to increased use (51). This also holds  
3 true in the case of traditional media devices such as televisions and computers (45, 51).

4 Use of mobile screen media devices was higher among children whose parents believed in  
5 their pacifying effects, with parents using these devices as behavioural regulation tools to  
6 secure free time or when busy with household chores or shopping (4, 10, 16, 53, 54). Studies  
7 have shown that although parents are aware of the negative effects of using these devices for  
8 longer durations, many of them are high screen users themselves and are comfortable  
9 allowing their children to use these devices (49, 55). Parents are concerned about their  
10 children going online, but research indicates they are less concerned about their children  
11 using a smartphone or watching television (7).

### 12 *Methodological limitations of studies reviewed*

13 A strength of this study was the protocol paper that guided the methodology of the review  
14 (22), however, we did not search the grey literature or include qualitative studies. A major  
15 limitation of the studies reviewed was the lack of objective measures to assess children's  
16 media use with parental proxy reports used in all of the studies. This approach may  
17 underestimate or overestimate true exposure because of recall bias, social desirability bias or  
18 simply not being aware of screen viewing behaviours (8). In addition, only one study tested  
19 reliability and validity of their instrument (36) while others either relied on previously used  
20 questionnaires with unknown validity/reliability estimates. The review was also challenging  
21 due to the lack of standardised terminology when researching mobile media screen use  
22 research, as well as the lack of standardised reporting of findings by age. The American  
23 Academy of Paediatrics (15) recommendations for children screen media uses the aged  
24 categories: a) younger than 18 months; b) 18-24 months; c) 2-5 years; and d) 6 and older.

1  
2  
3  
4  
5  
6  
7  
8  
9  
10  
11  
12  
13  
14  
15  
16  
17  
18  
19  
20  
21  
22  
23  
24  
25  
26  
27  
28  
29  
30  
31  
32  
33  
34  
35  
36  
37  
38  
39  
40  
41  
42  
43  
44  
45  
46  
47  
48  
49  
50  
51  
52  
53  
54  
55  
56  
57  
58  
59  
60

1 However, the studies in this review often reported across these age groups or failed to provide  
2 detailed information of the targets group’s age when undertaking analysis. This made  
3 interpretation of findings challenging and should be addressed in any future studies in this  
4 area.

## 5 **CONCLUSION**

6 Despite the rapid growth in mobile technologies, this review on the correlates of mobile  
7 screen media use among children 0-8 years identified limited but increasing research being  
8 undertaken in this area. The review found that correlates such as child’s age and media skills,  
9 parental media use and access to media devices at home appeared to impact on determining  
10 the mobile screen media use. Screen media use can certainly enhance life experiences and  
11 learnings, however it is important that it is used appropriately and the family environment can  
12 play a key role in the maintaining a “healthy media diet”. To better understand the impact of  
13 environmental factors on children’s mobile screen media and stimulate discussion, we need  
14 to better understand the role of parental rules; the use of mobile screen devices as behavioural  
15 regulation tools; and the role of parents and older siblings as role models. To achieve this, we  
16 need valid and reliable objective measures such as a smartphone/tablet applications that  
17 measure the time the screen is on (56), use of standardised terminology, and the reporting of  
18 findings against specific age groups. These approaches will support a better understanding of  
19 the correlates of mobile screen media use and traditional screen media use when undertaking  
20 future research.

21

1  
2  
3 **1 List of abbreviations used**  
4

5  
6 2 PDA: Personal Digital Assistants  
7

8  
9 3 PRISMA: Preferred Reporting Items for Systematic Reviews and Meta-analyses  
10

11 **4 Declarations:**  
12

13  
14 **5 Ethics approval and consent to participate**  
15

16  
17 6 Since this systematic review uses already published, de-identified data, it is hence exempt  
18  
19 7 from the ethics approval process. It does not involve any contact with the human participants  
20  
21 8 and has not collected any primary data.  
22  
23

24 **9 Consent for publication**  
25

26  
27 10 This is “Not applicable” for this study as it does not report any individual level data.  
28  
29

30 **11 Availability of data and material**  
31

32  
33 12 The findings of this review rely on the data presented on the papers that are already published  
34  
35 13 and are easily accessible on public domains.  
36  
37

38 **14 Competing interests**  
39

40  
41 15 The authors declare that they have no financial and non-financial competing interests.  
42  
43

44 **16 Funding**  
45

46  
47 17 This study has not received any funding from any source.  
48  
49

50 **18 Author’s contribution**  
51

52  
53 19 SP, JL and JJ jointly conceived and designed the study. SP was responsible for searching the  
54  
55 20 literature, screening the papers, working on design, critically reviewing the papers and  
56  
57  
58  
59  
60

1  
2  
3  
4  
5  
6  
7  
8  
9  
10  
11  
12  
13  
14  
15  
16  
17  
18  
19  
20  
21  
22  
23  
24  
25  
26  
27  
28  
29  
30  
31  
32  
33  
34  
35  
36  
37  
38  
39  
40  
41  
42  
43  
44  
45  
46  
47  
48  
49  
50  
51  
52  
53  
54  
55  
56  
57  
58  
59  
60

1 drafting the manuscript. JJ provided overall supervision for the study, finalised methodology,  
2 screening of full text, quality assessment, and edited the manuscript. NS was involved in  
3 searching the database, initial screening of title and abstracts and revised the manuscript. JL  
4 contributed to design, screening of full text, quality assessment, and organised and revised the  
5 manuscript. All authors have read and approved the final version of manuscript.

## 6 **Acknowledgements**

7 We would like to acknowledge the support of Public health faculty librarian of Curtin  
8 University, Ms. Diana Blackwood for her guidance during the database searching stage.

## 9 **Author's information**

10 Susan Paudel (BPH, MPH, MHIthProm): School of Public Health, Curtin University,  
11 Western Australia, Email: [replysusan@gmail.com](mailto:replysusan@gmail.com)

12 Dr. Jonine Jancey ( BSc (Hons) PhD) : Associate Professor, Collaboration for Evidence,  
13 Research and Impact in Public Health (CERIPH), School of Public Health, Curtin  
14 University, Email: [j.jancey@curtin.edu.au](mailto:j.jancey@curtin.edu.au)

15 Narayan Subedi (BPH, MPH, PGDPHN): Assistant Professor, Department of Community  
16 Medicine and Public Health, Maharajgunj Medical Campus, Institute of Medicine, Tribhuvan  
17 University, Nepal, Email: [subedi.narayan@gmail.com](mailto:subedi.narayan@gmail.com)

18 Dr. Justine Leavy (BSc, MPH, PhD): Senior Lecturer, Collaboration for Evidence, Research  
19 and Impact in Public Health (CERIPH), School of Public Health, Curtin University,  
20 Email: [j.leavy@curtin.edu.au](mailto:j.leavy@curtin.edu.au)

21

## 1 References

1. Connell SL, Lauricella AR, Wartella E. Parental Co-Use of Media Technology with their Young Children in the USA. *Journal of Children and Media*. 2015;9(1):5-21.
2. Holloway D, Green L, Livingstone S. *Zero to eight: Young children and their internet use*. London: LSE, EU Kids Online; 2013.
3. Rideout V. *Zero to eight: Children's media use in America 2013*. United States of America: Common Sense Media, 2013.
4. Kabali HK, Irigoyen MM, Nunez-Davis R, Budacki JG, Mohanty SH, Leister KP, et al. Exposure and use of mobile media devices by young children. *Pediatrics*. 2015;2015-151.
5. Houghton S, Hunter SC, Rosenberg M, Wood L, Zadow C, Martin K, et al. Virtually impossible: limiting Australian children and adolescents daily screen based media use. *BMC Public Health*. 2015;15(1):1.
6. Ofcom. *Communications Market Report Bite-sized*. 2016.
7. Ofcom. *Children and parents: media use and attitudes report*. Ofcom, 2016.
8. Downing KL, Hnatiuk J, Hesketh KD. Prevalence of sedentary behavior in children under 2years: A systematic review. *Preventive Medicine*. 2015;78:105-14.
9. Christakis DA. Interactive media use at younger than the age of 2 years: time to rethink the American Academy of Pediatrics guideline? *JAMA pediatrics*. 2014;168(5):399-400.
10. Radesky JS, Schumacher J, Zuckerman B. Mobile and interactive media use by young children: the good, the bad, and the unknown. *Pediatrics*. 2015;135(1):1-3.
11. Troseth GL, Russo CE, Strouse GA. What's next for research on young children's interactive media? *Journal of Children and Media*. 2016;10(1):54-62.
12. Biddiss E, Irwin J. Active video games to promote physical activity in children and youth: a systematic review. *Arch Pediatr Adolesc Med*. 2010;164(7):664-72.
13. Strasburger V., Hogan M. Policy Statement: children, adolescents and the media. *Pediatrics*. 2013;132:958-61.
14. Department of Health. *Australia's Physical Activity and Sedentary Behaviour Guidelines*: Australian Government; 2015 [Available from: <http://www.health.gov.au/internet/main/publishing.nsf/content/health-pubhlth-strateg-phys-act-guidelines#npa05>].
15. American Academy of Pediatrics. *American Academy of Pediatrics Announces New Recommendations for Children's Media Use USA*: American Academy of Pediatrics; 2017 [Available from: <https://www.aap.org/en-us/about-the-aap/aap-press-room/pages/american-academy-of-pediatrics-announces-new-recommendations-for-childrens-media-use.aspx>].
16. Radesky JS, Peacock-Chambers E, Zuckerman B, Silverstein M. Use of Mobile Technology to Calm Upset Children: Associations With Social-Emotional Development. *JAMA Pediatrics*. 2016;170(4):397-9.
17. Duch H, Fisher EM, Ensari I, Harrington A. Screen time use in children under 3 years old: a systematic review of correlates. *Int J Behav Nutr Phys Act*. 2013;10(1):1-10.
18. Hinkley T, Salmon J, Okely AD, Trost SG. Correlates of sedentary behaviours in preschool children: a review. *Int J Behav Nutr Phys Act*. 2010;7(66):10.
19. Cillero IH, Jago R. Systematic review of correlates of screen-viewing among young children. *Preventive Medicine*. 2010;51(1):3-10.
20. Vanderloo LM. Screen-viewing among preschoolers in childcare: A systematic review. *BMC Pediatr*. 2014;14(1):205.
21. Lawman HG, Wilson DK. A review of family and environmental correlates of health behaviors in high-risk youth. *Obesity (Silver Spring)*. 2012;20(6):1142-57.

- 1  
2  
3 1 22. Paudel S, Leavy J, Jancey J. Correlates of mobile screen media use among children aged 0–8:  
4 2 protocol for a systematic review. *Systematic reviews*. 2016;5(1):1.  
5 3 23. Moher D, Liberati A, Tetzlaff J, Altman DG, Group P. Preferred reporting items for systematic  
6 4 reviews and meta-analyses: the PRISMA statement. *International Journal of Surgery*. 2010;8(5):336-  
7 5 41.  
8 6 24. Knobloch K, Yoon U, Vogt PM. Preferred reporting items for systematic reviews and meta-  
9 7 analyses (PRISMA) statement and publication bias. *Journal of Cranio-Maxillofacial Surgery*.  
10 8 2011;39(2):91-2.  
11 9 25. Liberati A, Altman DG, Tetzlaff J, Mulrow C, Gøtzsche PC, Ioannidis JPA, et al. The PRISMA  
12 10 statement for reporting systematic reviews and meta-analyses of studies that evaluate health care  
13 11 interventions: explanation and elaboration. *Journal of Clinical Epidemiology*. 2009;62(10):e1-e34.  
14 12 26. Downs SH, Black N. The feasibility of creating a checklist for the assessment of the  
15 13 methodological quality both of randomised and non-randomised studies of health care  
16 14 interventions. *Journal of Epidemiology and Community Health*. 1998;52(6):377-84.  
17 15 27. Asplund KM, Kair LR, Arain YH, Cervantes M, Oreskovic NM, Zuckerman KE. Early childhood  
18 16 screen time and parental attitudes toward child television viewing in a low-income latino population  
19 17 attending the special supplemental nutrition program for women, infants, and children. *Child*.  
20 18 2015;11(5):590-9.  
21 19 28. Jago R, Wood L, Zahra J, Thompson JL, Sebire SJ. Parental control, nurturance, self-efficacy,  
22 20 and screen viewing among 5-to 6-year-old children: a cross-sectional mediation analysis to inform  
23 21 potential behavior change strategies. *Child*. 2015;11(2):139-47.  
24 22 29. Kesten JM, Sebire SJ, Turner KM, Stewart-Brown S, Bentley G, Jago R. Associations between  
25 23 rule-based parenting practices and child screen viewing: a cross-sectional study. *Preventive*  
26 24 *Medicine Reports*. 2015;2:84-9.  
27 25 30. Nikken P, Schols M. How and Why Parents Guide the Media Use of Young Children. *Journal*  
28 26 *of Child and Family Studies*. 2015;24(11):3423-35.  
29 27 31. Lauricella AR, Wartella E, Rideout VJ. Young children's screen time: The complex role of  
30 28 parent and child factors. *Journal of Applied Developmental Psychology*. 2015;36:11-7.  
31 29 32. Lee ST, Wong JE, Ong WW, Ismail MN, Deurenberg P, Poh BK. Physical activity pattern of  
32 30 Malaysian preschoolers: Environment, barriers, and motivators for active play. *Asia-Pacific Journal of*  
33 31 *Public Health*. 2016;28(5, Suppl):21S-34S.  
34 32 33. Pempek T, McDaniel B. Young Children's Tablet Use and Associations with Maternal Well-  
35 33 Being. *Journal of Child & Family Studies*. 2016;25(8):2636-47.  
36 34 34. Pyper E, Harrington D, Manson H. The impact of different types of parental support  
37 35 behaviours on child physical activity, healthy eating, and screen time: a cross-sectional study. *Bmc*  
38 36 *Public Health*. 2016;16.  
39 37 35. Sigmund E, Badura P, Vokacova J, Sigmundova D. Parent-Child Relationship of Pedometer-  
40 38 Assessed Physical Activity and Proxy-Reported Screen Time in Czech Families with Preschoolers.  
41 39 *International Journal of Environmental Research and Public Health*. 2016;13(7).  
42 40 36. Wu CST, Fowler C, Lam WYY, Wong HT, Wong CHM, Loke AY. Parenting approaches and  
43 41 digital technology use of preschool age children in a Chinese community. *Ital*. 2014;40(1):1-8.  
44 42 37. Jago R, Sebire SJ, Lucas PJ, Turner KM, Bentley GF, Goodred JK, et al. Parental modelling,  
45 43 media equipment and screen-viewing among young children: Cross-sectional study. *BMJ Open*.  
46 44 2013;3(4).  
47 45 38. Carson V, Kuzik N. Demographic correlates of screen time and objectively measured  
48 46 sedentary time and physical activity among toddlers: a cross-sectional study. *Bmc Public Health*.  
49 47 2017;17.  
50 48 39. Bronfenbrenner U, Evans GW. Developmental Science in the 21st Century: Emerging  
51 49 Questions, Theoretical Models, Research Designs and Empirical Findings. *Social Development*.  
52 50 2000;9(1):115-25.  
53  
54  
55  
56  
57  
58  
59  
60

- 1  
2  
3 1 40. Warren R. Parental mediation of preschool children's television viewing. *J Broadcast Electron*  
4 2 *Media*. 2003;47(3):394-417.  
5 3 41. Australian Communications and Media Authority (ACMA). Access to the internet, broadband  
6 4 and mobile phones in family households. Australia: 2008.  
7 5 42. Brown R, Ogden J. Children's eating attitudes and behaviour: a study of the modelling and  
8 6 control theories of parental influence. *Health Educ Res*. 2004;19(3):261-71.  
9 7 43. Draxten M, Fulkerson JA, Friend S, Flattum CF, Schow R. Parental role modeling of fruits and  
10 8 vegetables at meals and snacks is associated with children's adequate consumption. *Appetite*.  
11 9 2014;78:1-7.  
12 10 44. Matarma T, Koski P, Löyttyniemi E, Lagström H. The factors associated with toddlers' screen  
13 11 time change in the STEPS Study: A two-year follow-up. *Preventive medicine*. 2016;84:27-33.  
14 12 45. De Jong E, Visscher T, HiraSing R, Heymans M, Seidell J, Renders C. Association between TV  
15 13 viewing, computer use and overweight, determinants and competing activities of screen time in 4-to  
16 14 13-year-old children. *Int J Obes (Lond)*. 2013;37(1):47-53.  
17 15 46. Xu H, Wen LM, Rissel C. Associations of parental influences with physical activity and screen  
18 16 time among young children: a systematic review. *Journal of Obesity*. 2015;2015.  
19 17 47. Birken CS, Maguire J, Mekky M, Manhiot C, Beck CE, Jacobson S, et al. Parental factors  
20 18 associated with screen time in pre-school children in primary-care practice: a TARGet Kids! study.  
21 19 *Public Health Nutrition*. 2011;14(12):2134-38.  
22 20 48. Jago R, Thompson JL, Sebire SJ, Wood L, Pool L, Zahra J, et al. Cross-sectional associations  
23 21 between the screen-time of parents and young children: differences by parent and child gender and  
24 22 day of the week. *Int J Behav Nutr Phys Act*. 2014;11(1):54-64.  
25 23 49. Schoeppe S, Rebar AL, Short CE, Alley S, Van Lippevelde W, Vandelanotte C. How is adults'  
26 24 screen time behaviour influencing their views on screen time restrictions for children? A cross-  
27 25 sectional study. *BMC public health*. 2016;16(1):201.  
28 26 50. Vandewater EA, Rideout VJ, Wartella EA, Huang X, Lee JH, Shim M-s. Digital childhood:  
29 27 electronic media and technology use among infants, toddlers, and preschoolers. *Pediatrics*.  
30 28 2007;119(5):e1006-15.  
31 29 51. Veldhuis L, van Grieken A, Renders CM, HiraSing RA, Raat H. Parenting Style, the home  
32 30 environment, and screen time of 5-year-old children; The 'Be Active, Eat Right' Study. *PLoS ONE*.  
33 31 2014;9(2):e88486.  
34 32 52. Dumuid D, Olds TS, Lewis LK, Maher C. Does home equipment contribute to socioeconomic  
35 33 gradients in Australian children's physical activity, sedentary time and screen time? *BMC public*  
36 34 *health*. 2016;16(1):736.  
37 35 53. Chiong C., Shuler C. Learning: Is there an app for that? Investigations of young children's  
38 36 usage and learning with mobile devices and apps. Sesame Workshop; The Joan Ganz Cooney Centre,  
39 37 New York 2010.  
40 38 54. Carson V, Tremblay MS, Spence JC, Timmons BW, Janssen I. The Canadian Sedentary  
41 39 Behaviour Guidelines for the Early Years (zero to four years of age) and screen time among children  
42 40 from Kingston, Ontario. *Paediatrics & child health*. 2013;18(1):25-8.  
43 41 55. He M, Piché L, Beynon C, Harris S. Screen-related Sedentary Behaviors: Children's and  
44 42 Parents' Attitudes, Motivations, and Practices. *Journal of Nutrition Education and Behavior*.  
45 43 2010;42(1):17-25.  
46 44 56. Christensen MA, Bettencourt L, Kaye L, Moturu ST, Nguyen KT, Olgin JE, et al. Direct  
47 45 Measurements of Smartphone Screen-Time: Relationships with Demographics and Sleep. *PLoS ONE*.  
48 46 2016;11(11):e0165331.

47

48

1  
2  
3  
4  
5  
6  
7  
8  
9  
10  
11  
12  
13  
14  
15  
16  
17  
18  
19  
20  
21  
22  
23  
24  
25  
26  
27  
28  
29  
30  
31  
32  
33  
34  
35  
36  
37  
38  
39  
40  
41  
42  
43  
44  
45  
46  
47  
48  
49  
50  
51  
52  
53  
54  
55  
56  
57  
58  
59  
60

1 Figure 1: PRISMA flow chart for study selection

2

For peer review only



1  
2  
3  
4  
5  
6  
7  
8  
9  
10  
11  
12  
13  
14  
15  
16  
17  
18  
19  
20  
21  
22  
23  
24  
25  
26  
27  
28  
29  
30  
31  
32  
33  
34  
35  
36  
37  
38  
39  
40  
41  
42  
43  
44  
45  
46  
47  
48  
49  
50  
51  
52  
53  
54  
55  
56  
57  
58  
59  
60

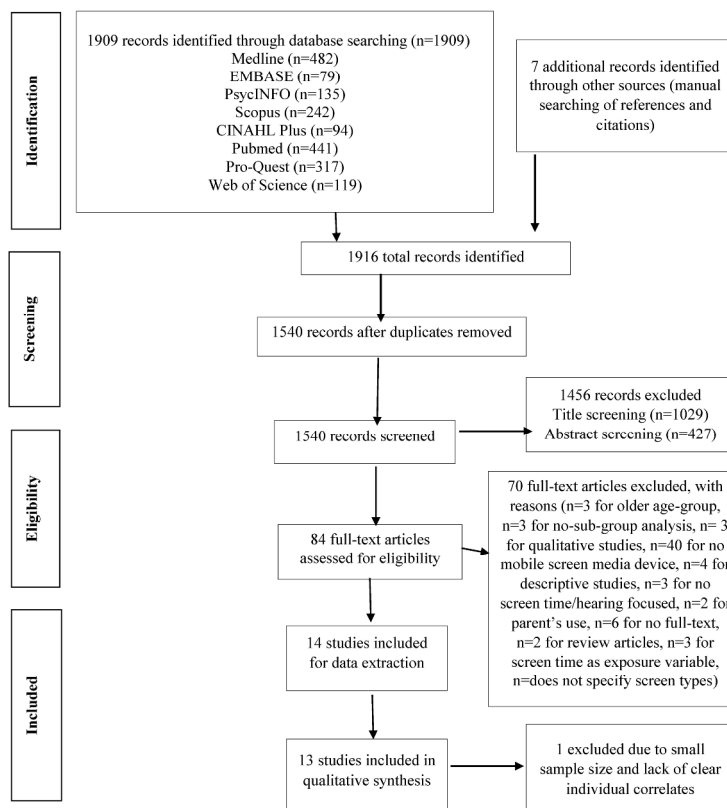

Figure 1: PRISMA flow chart for study selection

Figure 1: PRISMA flowchart for study selection

297x420mm (300 x 300 DPI)



# PRISMA 2009 Checklist

1  
2  
3  
4  
5  
6  
7  
8  
9  
10  
11  
12  
13  
14  
15  
16  
17  
18  
19  
20  
21  
22  
23  
24  
25  
26  
27  
28  
29  
30  
31  
32  
33  
34  
35  
36  
37  
38  
39  
40  
41  
42  
43  
44  
45  
46  
47  
48  
49

| Section/topic                      | #  | Checklist item                                                                                                                                                                                                                                                                                              | Reported on page # |
|------------------------------------|----|-------------------------------------------------------------------------------------------------------------------------------------------------------------------------------------------------------------------------------------------------------------------------------------------------------------|--------------------|
| <b>TITLE</b>                       |    |                                                                                                                                                                                                                                                                                                             |                    |
| Title                              | 1  | Identify the report as a systematic review, meta-analysis, or both.                                                                                                                                                                                                                                         | 1                  |
| <b>ABSTRACT</b>                    |    |                                                                                                                                                                                                                                                                                                             |                    |
| Structured summary                 | 2  | Provide a structured summary including, as applicable: background; objectives; data sources; study eligibility criteria, participants, and interventions; study appraisal and synthesis methods; results; limitations; conclusions and implications of key findings; systematic review registration number. | 3,4                |
| <b>INTRODUCTION</b>                |    |                                                                                                                                                                                                                                                                                                             |                    |
| Rationale                          | 3  | Describe the rationale for the review in the context of what is already known.                                                                                                                                                                                                                              | 5,6                |
| Objectives                         | 4  | Provide an explicit statement of questions being addressed with reference to participants, interventions, comparisons, outcomes, and study design (PICOS).                                                                                                                                                  | 6,7                |
| <b>METHODS</b>                     |    |                                                                                                                                                                                                                                                                                                             |                    |
| Protocol and registration          | 5  | Indicate if a review protocol exists, if and where it can be accessed (e.g., Web address), and, if available, provide registration information including registration number.                                                                                                                               | 7                  |
| Eligibility criteria               | 6  | Specify study characteristics (e.g., PICOS, length of follow-up) and report characteristics (e.g., years considered, language, publication status) used as criteria for eligibility, giving rationale.                                                                                                      | 8                  |
| Information sources                | 7  | Describe all information sources (e.g., databases with dates of coverage, contact with study authors to identify additional studies) in the search and date last searched.                                                                                                                                  | 9                  |
| Search                             | 8  | Present full electronic search strategy for at least one database, including any limits used, such that it could be repeated.                                                                                                                                                                               | 11                 |
| Study selection                    | 9  | State the process for selecting studies (i.e., screening, eligibility, included in systematic review, and, if applicable, included in the meta-analysis).                                                                                                                                                   | 9,12               |
| Data collection process            | 10 | Describe method of data extraction from reports (e.g., piloted forms, independently, in duplicate) and any processes for obtaining and confirming data from investigators.                                                                                                                                  | 12                 |
| Data items                         | 11 | List and define all variables for which data were sought (e.g., PICOS, funding sources) and any assumptions and simplifications made.                                                                                                                                                                       | 8,9                |
| Risk of bias in individual studies | 12 | Describe methods used for assessing risk of bias of individual studies (including specification of whether this was done at the study or outcome level), and how this information is to be used in any data synthesis.                                                                                      | 12                 |
| Summary measures                   | 13 | State the principal summary measures (e.g., risk ratio, difference in means).                                                                                                                                                                                                                               | 7                  |
| Synthesis of results               | 14 | Describe the methods of handling data and combining results of studies, if done, including measures of consistency (e.g., $I^2$ for each meta-analysis).                                                                                                                                                    | 12                 |

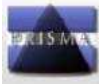

# PRISMA 2009 Checklist

Page 1 of 2

| Section/topic                 | #  | Checklist item                                                                                                                                                                                           | Reported on page # |
|-------------------------------|----|----------------------------------------------------------------------------------------------------------------------------------------------------------------------------------------------------------|--------------------|
| Risk of bias across studies   | 15 | Specify any assessment of risk of bias that may affect the cumulative evidence (e.g., publication bias, selective reporting within studies).                                                             | 12                 |
| Additional analyses           | 16 | Describe methods of additional analyses (e.g., sensitivity or subgroup analyses, meta-regression), if done, indicating which were pre-specified.                                                         | 12                 |
| <b>RESULTS</b>                |    |                                                                                                                                                                                                          |                    |
| Study selection               | 17 | Give numbers of studies screened, assessed for eligibility, and included in the review, with reasons for exclusions at each stage, ideally with a flow diagram.                                          | 12,13              |
| Study characteristics         | 18 | For each study, present characteristics for which data were extracted (e.g., study size, PICOS, follow-up period) and provide the citations.                                                             | 12,13              |
| Risk of bias within studies   | 19 | Present data on risk of bias of each study and, if available, any outcome level assessment (see item 12).                                                                                                | 13,14              |
| Results of individual studies | 20 | For all outcomes considered (benefits or harms), present, for each study: (a) simple summary data for each intervention group (b) effect estimates and confidence intervals, ideally with a forest plot. | 13-23              |
| Synthesis of results          | 21 | Present results of each meta-analysis done, including confidence intervals and measures of consistency.                                                                                                  |                    |
| Risk of bias across studies   | 22 | Present results of any assessment of risk of bias across studies (see Item 15).                                                                                                                          |                    |
| Additional analysis           | 23 | Give results of additional analyses, if done (e.g., sensitivity or subgroup analyses, meta-regression [see Item 16]).                                                                                    |                    |
| <b>DISCUSSION</b>             |    |                                                                                                                                                                                                          |                    |
| Summary of evidence           | 24 | Summarize the main findings including the strength of evidence for each main outcome; consider their relevance to key groups (e.g., healthcare providers, users, and policy makers).                     | 24-26              |
| Limitations                   | 25 | Discuss limitations at study and outcome level (e.g., risk of bias), and at review-level (e.g., incomplete retrieval of identified research, reporting bias).                                            | 26-27              |
| Conclusions                   | 26 | Provide a general interpretation of the results in the context of other evidence, and implications for future research.                                                                                  | 27                 |
| <b>FUNDING</b>                |    |                                                                                                                                                                                                          |                    |
| Funding                       | 27 | Describe sources of funding for the systematic review and other support (e.g., supply of data); role of funders for the systematic review.                                                               |                    |

From: Moher D, Liberati A, Tetzlaff J, Altman DG, The PRISMA Group (2009). Preferred Reporting Items for Systematic Reviews and Meta-Analyses: The PRISMA Statement. PLoS Med 6(6): e1000097. doi:10.1371/journal.pmed1000097

For more information, visit: [www.prisma-statement.org](http://www.prisma-statement.org).

Page 2 of 2

For peer review only - <http://bmjopen.bmj.com/site/about/guidelines.xhtml>

# BMJ Open

## Correlates of mobile screen media use among children aged 0-8: a systematic review

|                                 |                                                                                                                                                                                                                                                                                                                                                                                                                                                              |
|---------------------------------|--------------------------------------------------------------------------------------------------------------------------------------------------------------------------------------------------------------------------------------------------------------------------------------------------------------------------------------------------------------------------------------------------------------------------------------------------------------|
| Journal:                        | <i>BMJ Open</i>                                                                                                                                                                                                                                                                                                                                                                                                                                              |
| Manuscript ID                   | bmjopen-2016-014585.R3                                                                                                                                                                                                                                                                                                                                                                                                                                       |
| Article Type:                   | Research                                                                                                                                                                                                                                                                                                                                                                                                                                                     |
| Date Submitted by the Author:   | 15-Aug-2017                                                                                                                                                                                                                                                                                                                                                                                                                                                  |
| Complete List of Authors:       | Paudel, Susan; Curtin University School of Public Health, Jancey, Jonine; Curtin University, Collaboration for Evidence, Research and Impact in Public Health (CERIPH), School of Public Health Subedi, Narayan; Maharajgunj Medical Campus, Institute of Medicine, Department of Community Medicine and Public Health Leavy, Justine; Curtin University, Collaboration for Evidence, Research and Impact in Public Health (CERIPH), School of Public Health |
| <b>Primary Subject Heading</b>: | Public health                                                                                                                                                                                                                                                                                                                                                                                                                                                |
| Secondary Subject Heading:      | Epidemiology, Research methods                                                                                                                                                                                                                                                                                                                                                                                                                               |
| Keywords:                       | Children, Mobile media use, Screen time, Correlates, Systematic review                                                                                                                                                                                                                                                                                                                                                                                       |
|                                 |                                                                                                                                                                                                                                                                                                                                                                                                                                                              |

SCHOLARONE™  
Manuscripts

1  
2  
3  
4 1 **Title: Correlates of mobile screen media use among children aged 0-8: a**  
5 2 **systematic review**  
6  
7 3

8  
9  
10 4 Authors:

11  
12 5 Susan Paudel

13  
14 6 School of Public Health, Curtin University, Western Australia

15  
16  
17 7 [replysusan@gmail.com](mailto:replysusan@gmail.com)  
18

19 8

20  
21 9 Dr. Jonine Jancey

22  
23  
24 10 Collaboration for Evidence, Research and Impact in Public Health (CERIPH), School of Public  
25  
26 11 Health, Curtin University, Western Australia

27  
28  
29 12 [j.jancey@curtin.edu.au](mailto:j.jancey@curtin.edu.au)  
30

31 13

32  
33 14 Narayan Subedi

34  
35  
36 15 Department of Community Medicine and Public Health, Maharajgunj Medical Campus, Institute  
37  
38 16 of Medicine, Tribhuvan University

39  
40  
41 17 [subedi.narayan@gmail.com](mailto:subedi.narayan@gmail.com)  
42

43 18

44  
45 19 Dr. Justine Leavy

46  
47  
48 20 Collaboration for Evidence, Research and Impact in Public Health (CERIPH), School of Public  
49  
50 21 Health, Curtin University, Western Australia

51  
52  
53 22 [j.leavy@curtin.edu.au](mailto:j.leavy@curtin.edu.au)  
54

55 23  
56  
57  
58  
59  
60

1  
2  
3 1 **Corresponding author:**  
4

5 2 Susan Paudel  
6

7  
8 3 School of Public Health, Curtin University, Western Australia  
9

10 4 Email: [replysusan@gmail.com](mailto:replysusan@gmail.com)  
11

12 5 Contact no: 977-9843061616  
13  
14

15 6  
16  
17 7 **Keywords:** Mobile screen media, children, systematic review, screen time, correlates  
18  
19

20 8  
21  
22 9 Word Count: 5201  
23  
24

25 10  
26  
27 11  
28  
29 12  
30  
31 13  
32  
33  
34  
35  
36  
37  
38  
39  
40  
41  
42  
43  
44  
45  
46  
47  
48  
49  
50  
51  
52  
53  
54  
55  
56  
57  
58  
59  
60

## 1           2           3           4           5           6           7           8           9           10           11           12           13           14           15           16           17           18           19           20           21           22           23           24           25           26           27           28           29           30           31           32           33           34           35           36           37           38           39           40           41           42           43           44           45           46           47           48           49           50           51           52           53           54           55           56           57           58           59           60

1           2           3           4           5           6           7           8           9           10           11           12           13           14           15           16           17           18           19           20           21           22           23           24           25           26           27           28           29           30           31           32           33           34           35           36           37           38           39           40           41           42           43           44           45           46           47           48           49           50           51           52           53           54           55           56           57           58           59           60

1           2           3           4           5           6           7           8           9           10           11           12           13           14           15           16           17           18           19           20           21           22           23           24           25           26           27           28           29           30           31           32           33           34           35           36           37           38           39           40           41           42           43           44           45           46           47           48           49           50           51           52           53           54           55           56           57           58           59           60

1           2           3           4           5           6           7           8           9           10           11           12           13           14           15           16           17           18           19           20           21           22           23           24           25           26           27           28           29           30           31           32           33           34           35           36           37           38           39           40           41           42           43           44           45           46           47           48           49           50           51           52           53           54           55           56           57           58           59           60

1           2           3           4           5           6           7           8           9           10           11           12           13           14           15           16           17           18           19           20           21           22           23           24           25           26           27           28           29           30           31           32           33           34           35           36           37           38           39           40           41           42           43           44           45           46           47           48           49           50           51           52           53           54           55           56           57           58           59           60

1           2           3           4           5           6           7           8           9           10           11           12           13           14           15           16           17           18           19           20           21           22           23           24           25           26           27           28           29           30           31           32           33           34           35           36           37           38           39           40           41           42           43           44           45           46           47           48           49           50           51           52           53           54           55           56           57           58           59           60

## 1           2           3           4           5           6           7           8           9           10           11           12           13           14           15           16           17           18           19           20           21           22           23           24           25           26           27           28           29           30           31           32           33           34           35           36           37           38           39           40           41           42           43           44           45           46           47           48           49           50           51           52           53           54           55           56           57           58           59           60

1           2           3           4           5           6           7           8           9           10           11           12           13           14           15           16           17           18           19           20           21           22           23           24           25           26           27           28           29           30           31           32           33           34           35           36           37           38           39           40           41           42           43           44           45           46           47           48           49           50           51           52           53           54           55           56           57           58           59           60

1           2           3           4           5           6           7           8           9           10           11           12           13           14           15           16           17           18           19           20           21           22           23           24           25           26           27           28           29           30           31           32           33           34           35           36           37           38           39           40           41           42           43           44           45           46           47           48           49           50           51           52           53           54           55           56           57           58           59           60

## 1           2           3           4           5           6           7           8           9           10           11           12           13           14           15           16           17           18           19           20           21           22           23           24           25           26           27           28           29           30           31           32           33           34           35           36           37           38           39           40           41           42           43           44           45           46           47           48           49           50           51           52           53           54           55           56           57           58           59           60

1           2           3           4           5           6           7           8           9           10           11           12           13           14           15           16           17           18           19           20           21           22           23           24           25           26           27           28           29           30           31           32           33           34           35           36           37           38           39           40           41           42           43           44           45           46           47           48           49           50           51           52           53           54           55           56           57           58           59           60

1           2           3           4           5           6           7           8           9           10           11           12           13           14           15           16           17           18           19           20           21           22           23           24           25           26           27           28           29           30           31           32           33           34           35           36           37           38           39           40           41           42           43           44           45           46           47           48           49           50           51           52           53           54           55           56           57           58           59           60

1 studies with objective assessment of mobile screen media use and frequent examination of the  
2 potential correlates across multiple studies and settings are recommended.

3 **Review registration:** This review is registered with PROSPERO International Prospective  
4 Register of Ongoing Systematic Reviews (registration number: CRD42015028028).

### 5 **Keywords**

6 Children, mobile screen media, screen time, correlates, systematic review

### 7 **Strengths**

- 8 1. This review summarises current peer-reviewed literature on correlates of mobile screen  
9 media use among children aged eight years and less.
- 10 2. A peer reviewed and published protocol paper guided the systematic review.
- 11 3. The review incorporated a robust research strategy, that identified up-to-date key words  
12 with the assistance of public health librarian; and searched eight relevant databases
- 13 4. A comprehensive inclusion and exclusion criteria was established and used.

### 14 **Limitations**

- 15 1. All the reviewed studies were cross-sectional in design making it difficult to derive a  
16 casual inference.
- 17 2. Study sample sizes ranged from 149 to 3206, which may have impacted on the findings.
- 18 3. Association and consistency could not be determined in this review due to the study  
19 findings being segregated across different mobile screen media types, making the  
20 findings largely descriptive.

21



## 1 BACKGROUND

2 Young children are increasingly exposed to multiple screens including both the traditional fixed  
3 screens, such as televisions and desktop computers and newer mobile screen media devices such  
4 as smartphones and electronic tablets (1). Specifically, there has been a rapid uptake of mobile  
5 screen media devices in recent years, among young children (2, 3). This is largely facilitated by  
6 the characteristics of handheld devices, their portability, screen size, decreasing cost, multiple  
7 applications and interactive ability (4, 5). Because of the increasing uptake and use of mobile  
8 screen media devices, the daily screen time of traditional media such as television has decreased  
9 (6) while the time spent on the former has increased, especially in many developed countries (4).  
10 Though television is still the dominant media for family time, solitary viewing by children is  
11 mostly achieved using mobile screen media devices (7). This increasing exposure and  
12 accessibility to mobile screen media devices creates a conundrum. On one hand, mobile screen  
13 devices may increase children's sedentary behaviour, but they also have the potential to increase  
14 play opportunities, creating a tension for public health, and parents alike (8). Furthermore, the  
15 pleasure a child derives from interacting with these touchscreens may lead to increased and  
16 habitual use (9). Nevertheless, there are also some benefits associated with interactive mobile  
17 screen media devices use, such as learning opportunities and face-to face connections with  
18 distant family and friends and play opportunities (10, 11). Similarly, engagement with active  
19 video games have been reported to promote light to moderate physical activity (12).

20 Health guidelines recommend that children aged less than two should be exposed to a limited  
21 amount of educational mobile screen media use, while for those aged two-to-five, the daily  
22 screen time should be less than one hour (10, 13-15). However, worldwide a significant  
23 proportion of young children are exceeding the recommended exposure time (5). For example, in

1 an urban community in Philadelphia, USA, nearly half of one-year-old children were reportedly  
2 using mobile screen media devices on a daily basis, with use increasing with age (4).

3 Surprisingly, 75% of children had their own mobile device by the age of four (4). It seems  
4 parents are increasingly allowing their young children to use mobile screen media devices,  
5 especially smartphones and electronic tablets, to keep them occupied when they are doing  
6 household chores or shopping, to calm children in public places and to put children to sleep (3, 4,  
7 16).

8 Despite the increase in the use of mobile screen media devices such as smartphones, electronic  
9 tablets, handheld computers and Personal Digital Assistants (PDAs) by young children, very  
10 limited research has been carried out to identify the correlates associated with their increased use  
11 (4). Currently, screen time research is dominated by fixed screens with scant attention paid to  
12 mobile screen media devices (10). Systematic reviews to identify the correlates of mobile screen  
13 media use among young children are almost non-existent with previous reviews focussing on  
14 sedentary behaviours or television viewing (17-19).

15 Considering the increasing availability, ownership and use of mobile screen media devices  
16 (smartphones, electronic tablets, handheld computers, personal digital assistants (PDAs) among  
17 young children, identification of the correlates of mobile screen media use specific to children  
18 eight years and less is crucial. The purpose of this review was to systematically search and  
19 critically review the published peer-reviewed literature to identify the correlates of mobile screen  
20 media use among children eight years and less. Correlates are classified into proximal and distal  
21 factors using a bio-ecological model to facilitate comparison with the existing literature (17, 20).  
22 The model provides a strong theoretical basis to understand human behaviour (21) and has been  
23 described in detail elsewhere (22).

## 1       2       3       4       5       6       7       8       9       10       11       12       13       14       15       16       17       18       19       20       21       22       23       24       25       26       27       28       29       30       31       32       33       34       35       36       37       38       39       40       41       42       43       44       45       46       47       48       49       50       51       52       53       54       55       56       57       58       59       60

## 1       **METHODS**

2       This systematic review is based on Preferred Reporting Items for Systematic Reviews and Meta-  
3       analyses (PRISMA) statement (23-25) and is registered with PROSPERO International  
4       Prospective Register of Ongoing Systematic Reviews (registration number: CRD42015028028).  
5       The study used already published, de-identified data and hence is exempt from the ethics  
6       approval process. A detailed description of the methods is available in the protocol article (22).  
7       As discussed in the protocol article, initially the database search was planned for articles  
8       published between 2009 and 2015 (22). However, considering the increasing number of articles  
9       studying mobile screen media recently, the search was extended to March 2017.

### 10       *Outcome measure*

11       Mobile screen media use was the primary outcome measure. Mobile screen media use refers to  
12       children's use of mobile screens, such as mobile phones, electronic tablets, handheld computers  
13       or PDAs. The term 'screen time' is used to denote both the fixed screens and mobile media  
14       screen device use. This terminology is used when referring to the screen time guidelines for  
15       children and to refer to other articles that have studied children's total screen time including both  
16       fixed and mobile screens.

17       Correlates of mobile screen media use have been placed into five categories as per the bio-  
18       ecological model (17, 18). The five categories are:

- 19       • *Child biological and demographic factors* includes age, sex and body mass index (BMI).
- 20       • *Family biological and demographic factors* includes demographic and biological  
21       characteristics of the family members (particularly parents) and their education,  
22       occupation and income.

- 1 • *Family structure factors* includes the number of siblings, family size and family type.
- 2 • *Behavioural factors* includes the child's behavioural characteristics and their skills and
- 3 attitudes.
- 4 • *Sociocultural/ environmental factors* includes social, physical and environmental factors
- 5 within the home setting and community, and parental behavioural factors such as their
- 6 screen media skills, beliefs and attitudes towards the mobile screen media and self-
- 7 efficacy to limit their children's screen viewing behaviours.

8 Direction of association has been reviewed separately for: a) smartphones; b) electronic tablets;

9 c) touchscreens; and d) any media device (defined as the combination of traditional media plus at

10 least one other mobile screen media device).

### 11 ***Eligibility criteria***

12 The studies eligible for inclusion were peer-reviewed primary research articles with information

13 on mobile screen media use, parent-child co-use or adherence to screen time guidelines as the

14 outcome measure, that investigated the correlates of mobile screen media use among children

15 aged eight and less; based in home or community setting; and published, or in press in English

16 language journals between January 2009 to March 2017. The full description of the alignment of

17 the research question to the Population, Exposure, Comparison and Outcome (PECO) format

18 along with the exclusion criteria is presented in table 1.

19 **Table 1: Research question using PECO format**

| Criteria             | Description                           |
|----------------------|---------------------------------------|
| <b>P: Population</b> | Children aged eight years and less    |
| <b>E: Exposure</b>   | Correlates of mobile screen media use |
| <b>C: Comparison</b> | With vs. without the correlates       |

|                         |                                                                                                                                                                                                                                                                                                                                                                                                                                                                                                                                                                                                                                                                                   |
|-------------------------|-----------------------------------------------------------------------------------------------------------------------------------------------------------------------------------------------------------------------------------------------------------------------------------------------------------------------------------------------------------------------------------------------------------------------------------------------------------------------------------------------------------------------------------------------------------------------------------------------------------------------------------------------------------------------------------|
| <b>O: Outcome</b>       | Use of mobile screen media (e.g. mobile phones, electronic tablets, handheld computers, PDAs),                                                                                                                                                                                                                                                                                                                                                                                                                                                                                                                                                                                    |
| <b>Types of studies</b> | Quantitative studies using all designs (cross-sectional, case-control, cohort and intervention studies)                                                                                                                                                                                                                                                                                                                                                                                                                                                                                                                                                                           |
| <b>Exclusion</b>        | <p>Studies that have not reported correlates of mobile screen media use</p> <p>Studies that have not included at least one form of mobile screen media device</p> <p>Systematic reviews and meta-analysis</p> <p>Grey literature</p> <p>Qualitative studies</p> <p>Studies carried out in settings other than home or community</p> <p>Studies carried out among unhealthy participants</p> <p>Studies with broader age-groups and no sub-group analysis for the target group</p> <p>Papers published before 2009 to March 2017</p> <p>Papers published in language other than English</p> <p>Non-peer reviewed articles</p> <p>Studies involving children older than 8 years</p> |

## ***Search strategy and study selection***

Eight electronic databases: Medline, Scopus, Embase, CINAHL Plus, Pubmed, ProQuest, PsycINFO and Web of Science were searched for articles published between January 2009 and March 2017. Child related keywords including child\*, preschool, infant, kid and toddler and screen related keywords including screen time, screen viewing, mobile phone, cell phone, smartphone\*, PDA, tablet\*, iPad\*, handheld media, handheld computer\* were used to locate potential papers in the databases. The search was carried out during September-October 2015 and replicated in March 2017. The search commenced with Medline and the identified papers were excluded when searching other databases. However, only Embase, ProQuest and CINAHL Plus provided that option. Duplicate records were manually removed after compiling all the searches. The search strategy used in Medline database is presented in Table 2. A total of 1909

1 articles were identified through searching the eight databases. To ensure that all relevant articles  
 2 were identified, a manual search of the reference lists of the systematic reviews was also carried  
 3 out along with the checking of the *Google Scholar* profile of authors with frequent publication in  
 4 this field. A total of seven papers were retrieved from the manual searching process.

5 **Table 2: Search strategy used in Medline database**

| Database: Ovid Medline (R) 1946 to March 2017 |                                                                                                                                                                                                 |         |
|-----------------------------------------------|-------------------------------------------------------------------------------------------------------------------------------------------------------------------------------------------------|---------|
| SN                                            | Search strategy                                                                                                                                                                                 | Results |
| 1                                             | Only Child/ or Child/ or child.mp. or Child, Preschool/                                                                                                                                         | 1767004 |
| 2                                             | Infant/ or infant.mp.                                                                                                                                                                           | 1030660 |
| 3                                             | Kid.mp.                                                                                                                                                                                         | 1251    |
| 4                                             | Toddler.mp.                                                                                                                                                                                     | 2240    |
| 5                                             | 1 or 2 or 3 or 4                                                                                                                                                                                | 2242988 |
| 6                                             | Screen time.mp.                                                                                                                                                                                 | 639     |
| 7                                             | Smartphones.mp. or Cell Phones/                                                                                                                                                                 | 5961    |
| 8                                             | Mobile phones.mp.                                                                                                                                                                               | 1627    |
| 9                                             | Handheld computers.mp. or Computers, Handheld/                                                                                                                                                  | 2721    |
| 10                                            | Smartboard.mp.                                                                                                                                                                                  | 2       |
| 11                                            | PDA.mp.                                                                                                                                                                                         | 5860    |
| 12                                            | Screen media.mp.                                                                                                                                                                                | 42      |
| 13                                            | Mobile screen.mp.                                                                                                                                                                               | 5       |
| 14                                            | Microcomputers/ or Computers, Handheld/ or electronic tablets.mp.                                                                                                                               | 16724   |
| 15                                            | Tablets/ or Tablets.mp.                                                                                                                                                                         | 34967   |
| 16                                            | Mobile Applications/ or iPads.mp.                                                                                                                                                               | 699     |
| 17                                            | Handheld media.mp.                                                                                                                                                                              | 1       |
| 18                                            | Touchscreens.mp.                                                                                                                                                                                | 22      |
| 19                                            | Mobile devices.mp.                                                                                                                                                                              | 552     |
| 20                                            | Digital technology.mp.                                                                                                                                                                          | 348     |
| 21                                            | 6 or 7 or 8 or 9 or 10 or 11 or 12 or 13 or 14 or 15 or 16 or 17 or 18 or<br>19 or 20                                                                                                           | 64324   |
| 22                                            | 5 and 21                                                                                                                                                                                        | 6648    |
| 23                                            | ("Screen-viewing" or "screen time" or "mobile use" or "use of<br>smartphones" or "Cell phone use" or "increased screen time" or "use of<br>electronic tablets" or " use of mobile screens").mp. | 965     |
| 24                                            | 5 and 21 and 23                                                                                                                                                                                 | 525     |
| 25                                            | Limit 24 to (English language and humans and yr="2009 -Current" and                                                                                                                             | 482     |

---

"all child (0 to 18 years)"

---

1 \* Sign denotes for any character(s), SN= Serial number, mp=title, abstract, original title, name of  
2 substance word, subject heading word, keyword heading word, protocol supplementary concept word,  
3 rare disease supplementary concept word, unique identifier

4  
5 Endnote (version X7.5) software was used for managing all the identified articles (n=1916).  
6 Duplicate articles (n= 376) were removed. The remaining articles (n=1540) were then screened  
7 by title by two authors (SP and NS). From this, irrelevant titles (n=1029) were excluded. The  
8 abstract of the remaining articles (n= 511) were also reviewed by SP and NS; and a further 427  
9 articles were excluded. Full texts of the remaining articles (n=84) were retrieved and reviewed  
10 by all the four researchers (SP, NS, JJ and JL) against the inclusion/exclusion criteria, resulting  
11 in 13 papers being included in this systematic review. The authors of this systematic review were  
12 not blinded to the name, journal title or institutional affiliation of the authors of the articles  
13 selected. The process of study selection has been presented using the PRISMA flow-diagram in  
14 Figure 1.

### 15 *Assessment of included papers*

16 A modified version of the checklist by Downs and Black (26) was used to assess the quality of  
17 studies and the risk of bias. Out of 27 suggested checklist items, relevant items in the themes of  
18 reporting (questions 1-3, 6, 7, 10), external validity (questions 11, 12) and internal validity-bias  
19 (questions 18, 20) were considered appropriate for this review. A score of '1' was allocated for  
20 'Yes' and a score of '0' was allocated for 'No' and 'Unable to determine'. Out of a possible  
21 score of 10, a total score greater than 5 indicated a quality paper. Three researchers (SP, JJ and  
22 JL) independently carried out the appraisal using the checklist and the final quality score was

1  
2  
3 1 ascertained by comparing each of their scores. Discrepancies in scores were re-assessed jointly,  
4  
5 2 and a consensus reached.  
6  
7

### 8 ***Data extraction and management***

9  
10  
11 4 In order to maintain consistency and avoid bias, a data extraction table was developed.  
12  
13 5 Information on study design, country of study, age-group of participants, sample size, main  
14  
15 6 outcome variables, correlates and measures of association was extracted by one author (SP).  
16  
17 7 Mean duration of screen-viewing specific to individual devices was also extracted when  
18  
19 8 available. Adjusted Odds Ratio (AOR) and Standardised Coefficients (SC) were extracted in  
20  
21 9 order to establish the correlates. Since there were few studies that assessed a particular variable,  
22  
23 10 association and consistency could not be determined.  
24  
25  
26  
27  
28

## 29 **RESULTS**

### 30 ***Study characteristics***

31  
32  
33 13 Thirteen studies published between 2013 and 2017 were included in the review. Six were  
34  
35 14 published in 2015 (1, 27-31), four in 2016 (32-35) and one in 2014 (36), 2013 (37) and 2017  
36  
37 15 (38). The majority of the eligible studies were conducted in high-income countries with four  
38  
39 16 from the USA (1, 27, 31, 33), three from the United Kingdom (28, 29, 37), two from Canada (34,  
40  
41 17 38) and one from the Netherlands (30), Hong Kong (36), Malaysia (32) and Czech Republic  
42  
43 18 (35). All 13 studies were cross-sectional in design. The studies quality scores ranged from 6 to  
44  
45 19 10 with a mean score of 7.85, indicating all were considered quality studies.  
46  
47  
48  
49

50  
51  
52  
53 20 The study sample sizes ranged from n=149 to n=3206. Two studies reported using weighted data  
54  
55 21 to be representative of the national population (1, 31), two studies used random sampling (34,  
56  
57  
58  
59  
60



1  
2  
3 1 35), one used stratified random sampling (32), while all other studies used non-representative  
4  
5  
6 2 techniques (27-30, 33, 36-38). The mean age of participants was clearly stated in eight studies  
7  
8 3 (28, 30-35, 38) while four provided frequencies in different age-groups (27, 29, 36, 37).  
9  
10 4 However, Connell et. al. (1) did not report children's mean age. Based on the available data, the  
11  
12 5 mean age of the children was ( $4.74 \pm 1.72$ ) years. The descriptive characteristics of the included  
13  
14 6 studies are presented in Table 3.  
15  
16  
17  
18 7  
19  
20  
21  
22  
23  
24  
25  
26  
27  
28  
29  
30  
31  
32  
33  
34  
35  
36  
37  
38  
39  
40  
41  
42  
43  
44  
45  
46  
47  
48  
49  
50  
51  
52  
53  
54  
55  
56  
57  
58  
59  
60

1 **Table 3: Description of included studies**

| S.N | Author                 | Year | Country        | Study design    | Sample size | Age group                  | Outcome measure                  | Screen studied                                                                                   | Results specific to                               | Independent variables                                                                                                                    | Measure of association                                       | Quality score |
|-----|------------------------|------|----------------|-----------------|-------------|----------------------------|----------------------------------|--------------------------------------------------------------------------------------------------|---------------------------------------------------|------------------------------------------------------------------------------------------------------------------------------------------|--------------------------------------------------------------|---------------|
| 1   | Carson et. al (38).    | 2017 | Canada         | Cross-sectional | 149         | 12–35 months               | Children’s screen-time           | Television, videos, or DVDs on a television, computer, or portable device.                       | Electronic media (fixed and mobile screens)       | Parental and child demographics                                                                                                          | unstandardized beta coefficients and 95% confidence interval | 8             |
| 2   | Lee et. al. (32)       | 2016 | Malaysia       | Cross-sectional | 835         | 4-6 years                  | Children’s screen-time           | Watching television or video, or playing with computer, smartphones, or other electronic gadgets | Electronic media (fixed and mobile screens)       | Parental and child demographics, places for play, barriers and motivators for active play                                                | P-value from chi-square test                                 | 7             |
| 3   | Pempek et. al. (33)    | 2016 | US             | Cross-sectional | 358         | 12-48 months               | Children and mother’s tablet use | Electronic tablets                                                                               | Electronic tablets                                | Child age, Mother’s tablet use, income, education, personal well-being and age                                                           | Standardised coefficients                                    | 7             |
| 4   | Pyper et. al. (34)     | 2016 | Canada         | Cross-sectional | 3206        | Under 18/screen time: 1-18 | Children’s screen-time           | Television, DVD player; computer or laptop; tablet or iPad®; and video game console              | Electronic media (fixed and mobile screens)       | Different types of parental support behaviours (motivational, instrumental, regulatory and conditional), parental and child demographics | Odds ratio and 95% Confidence interval                       | 10            |
| 5   | Sigmund et. al. (35)   | 2016 | Czech Republic | Cross-sectional | 197         | 4-7 years                  | Children’s screen-time           | Watching TV (DVD, video) and PC (notebook, tablet, smartphone)                                   | Electronic media (fixed and mobile screens)       | Days of week, parental step count and screen time                                                                                        | Pearson correlations with 95% confidence intervals           | 8             |
| 6   | Nikken et al. (30)     | 2015 | Netherlands    | Cross-sectional | 896         | 0-7 years                  | Media ownership and use          | TV, game consoles, computers and touchscreens                                                    | Touchscreens (smartphones and electronic tablets) | Parent and child characteristics (age, access, concerns about media use)                                                                 | Standardised coefficients                                    | 6             |
| 7   | Lauricella et al. (31) | 2015 | US             | Cross-sectional | 2300        | 0-8 years                  | Children’s screen time           | Television, computers, smartphones, and tablets                                                  | Smartphones and electronic tablets                | Parental media use, parental attitudes, child’s age                                                                                      | Standardised coefficients                                    | 8             |
| 8   | Connell et. al. (1)    | 2015 | US             | Cross-sectional | 2326        | 0-8 years                  | Parent-child co-use of           | Books, TV, computers, video games, tablets,                                                      | Smartphones And electronic tablets                | Parent’s time with child, parent’s media use, parental and child                                                                         | Standardised coefficients                                    | 7             |

|    |                    |      |           |                 |     |           | media                                       | and smartphones                                                      |                                             | demographics                                                                                                 |                                        |   |
|----|--------------------|------|-----------|-----------------|-----|-----------|---------------------------------------------|----------------------------------------------------------------------|---------------------------------------------|--------------------------------------------------------------------------------------------------------------|----------------------------------------|---|
| 9  | Kesten et al. (29) | 2015 | UK        | Cross-sectional | 735 | 6-8 years | Children's screen-time                      | TV, computer, smartphone, game-console and multi-SV                  | Smartphones                                 | Parent's employment, education, number and sex of children, screen related limits                            | Odds ratio and 95% Confidence interval | 8 |
| 10 | Jago et al. (28)   | 2015 | UK        | Cross-sectional | 954 | 5-6 years | Children's screen-time                      | TV, computer/laptop use including tablets                            | Electronic tablets                          | Parenting styles and parental self-efficacy to limit screen time                                             | Odds ratio and 95% Confidence interval | 8 |
| 11 | Asplund et al.(27) | 2015 | US        | Cross-sectional | 314 | 0-5 years | Adherence to AAP guidelines for screen time | TV, video games, computers, cell phones and other electronic devices | Electronic media (fixed and mobile screens) | Child BMI, child/parent demographics, and household media environment, parental attitudes towards TV viewing | Odds ratio and 95% Confidence interval | 9 |
| 12 | Wu et al. (36)     | 2014 | Hong Kong | Cross-sectional | 202 | 3-6 years | Use of digital products                     | Television, digital tablets, smart phones, etc                       | Electronic media (fixed and mobile screens) | Participants' demographics, parenting approach (restrictive, instructive and co-using)                       | P-value from chi-square test           | 8 |
| 13 | Jago et al. (37)   | 2013 | UK        | Cross-sectional | 750 | 6-8 years | Children's screen-time                      | TV, game console, smart-phone and multiscreen-viewing                | Smartphones                                 | Parental media use, parental attitudes and access to media equipment                                         | Odds ratio and 95% Confidence interval | 8 |

### *Mobile screen media use*

Eleven studies reported screen viewing as the outcome measure (28-38), one reported adherence to the American Academy of Paediatrics (AAP) screen time guidelines (27) and one reported parent-child co-use of media (1).

Children's mobile screen media use in all 13 studies was measured by parental self-report. One paper reported face validity, content validity and test-retest reliability of the instrument used (36) and five of the research questionnaires had been used in previous studies (1, 27, 31, 32, 38). Three studies stated parental-proxy reports as having reasonable reliability and validity to measure children's mobile screen media use (28, 29, 37). Whilst, the other studies did not report on the reliability and validity of their instrument (30, 33-35). Overall, the mean duration of mobile screen media use could not be determined as only five studies reported the average duration (27, 30-32, 35), while all other studies categorised participants into groups, such as less than 2 hours and more than 2 hours of screen media use (1, 28, 29, 33, 34, 36-38).

### *Device use and correlates*

In total, 36 correlates of mobile screen media use were studied. Of these correlates, children's age was reported eight times, parental media use (fixed and mobile screens) seven times, family income five times, and three variables (child sex, parental age and education) four times. The remaining correlates were studied even fewer times (See table 4 and 5). Association and consistency of the variables could not be determined as a majority of the variables were studied in less than three studies.

Four studies reported an association specific to smart phones (1, 29, 31, 37) and electronic tablets (1, 28, 31, 33). Nikken et. al. (30) reported combined results for touchscreens (smartphones and

1  
2  
3 electronic tablets) while the other six studies reported correlates for electronic media, that  
4 included both traditional (e.g. televisions, computers) and new devices (e.g. mobile phones and  
5 electronic tablets) (27, 32, 34-36, 38). Use of a PDA was not studied.  
6  
7  
8  
9

## 10 11 **Correlates of mobile media use**

### 12 13 *Child biological and demographic factors*

14  
15  
16  
17 Six of the eight studies (75%) reported a positive association between the child's age and mobile  
18 screen media use (27, 31, 33, 34, 36, 38) (Table 4). Older children were more likely to use  
19 smartphones, tablets or any media compared to younger children (27, 31, 33, 34, 36, 38). Carson  
20 and colleagues concluded that for every one month increase in age, the use of any media  
21 increased by 9.3 minutes per day (95% CI: 2.8-15.8) (38). However, Connell et. al. examined  
22 parent-child co-use of smartphones and electronic tablets and reported an inverse association,  
23 indicating older children were less likely to co-use with parents (1). In contrast, Nikken et. al.  
24 (30) concluded that the child's age had no significant association with the use of touchscreens.  
25 Females were more likely to use any media for a longer duration than their male counterparts  
26 (32, 38) but there was no association with sex specifically in regard to touchscreen use (1, 30) .  
27 No association was found between the use of any media and child body mass index (BMI) (27).  
28  
29  
30  
31  
32  
33  
34  
35  
36  
37  
38  
39  
40  
41  
42  
43

### 44 45 *Family biological and demographic factors*

46  
47 Four studies reported an association between parental age and their children's mobile screen  
48 media use (1, 27, 33, 36) (see Table 4). Of these, three reported no statistically significant  
49 association (1, 27), while Wu et. al. found a negative association, indicating that screen devices  
50 (both fixed and mobile screens) were more frequently used by children with younger parents  
51 (36).  
52  
53  
54  
55  
56  
57  
58  
59  
60

1  
2  
3 Mixed associations were found between family income and children's mobile screen media use  
4  
5 (see Table 4). Two studies (30, 38) reported a positive association, indicating that children from  
6  
7 high-income families were using touchscreens or any media device longer than those from low-  
8  
9 income families. Conversely, studies by Pempek et. al.(33) and Lee et. al.(32) found no  
10  
11 association with family income, and Wu et. al. (36) reported a negative association. Wu also  
12  
13 found a negative association between parent's occupational status and children's mobile screen  
14  
15 media use (36). Furthermore children of stay-at-home parents used screen devices more  
16  
17 frequently than those whose parents were employed (36).  
18  
19  
20  
21  
22

23 No association was identified between young children's smartphone, electronic tablet or any  
24  
25 touchscreen use and parent's sex (1, 30). Similarly, parent's educational status (1, 30, 32, 33),  
26  
27 country of birth (38) and language (27) did not show any significant association with children's  
28  
29 mobile screen media use.  
30  
31  
32

### 33 ***Family structure factors***

34  
35

36 Two studies reported family factors associated with children's mobile screen media use (30, 36)  
37  
38 (Table 4). A positive association was reported between the number of children and use of  
39  
40 televisions, computers, tablets and mobile phones (36), and when there were two or more  
41  
42 children, they were more likely to use screen devices (both fixed and mobile screens) for talking  
43  
44 with friends compared to those families with one child (36).  
45  
46  
47  
48  
49  
50  
51  
52  
53  
54  
55  
56  
57  
58  
59  
60

**Table 4: Demographic and biological correlates of mobile screen media use and direction of association**

| Variable type                                    | Variables                           | Smartphones    |       | Tablets     |            | Touchscreens |       | Any media device                |                  |      |
|--------------------------------------------------|-------------------------------------|----------------|-------|-------------|------------|--------------|-------|---------------------------------|------------------|------|
|                                                  |                                     | Association    | Study | Association | Study      | Association  | Study | Association                     | Study            |      |
| <b>Child biological and demographic factors</b>  | Child age                           | +              | (31)  | +           | (31, 33)   | 0            | (30)  | +                               | (27, 34, 36, 38) |      |
|                                                  |                                     | - (co-use)     | (1)   | - (co-use)  | (1)        |              |       |                                 |                  |      |
|                                                  | Child sex (0= boy)                  | 0              | (1)   | 0           | (1)        | 0            | (30)  | +                               | (32, 38)         |      |
|                                                  | BMI                                 |                |       |             |            |              |       | 0                               | (27)             |      |
| <b>Family biological and demographic factors</b> | Parental age                        | 0              | (1)   | 0           | (1, 33)    |              |       | 0                               | (27)             |      |
|                                                  |                                     |                |       |             |            |              |       | -                               | (36)             |      |
|                                                  | Parent's sex (0 = father)           | 0              | (1)   | 0           | (1)        | 0            | (30)  |                                 |                  |      |
|                                                  | Family income                       |                |       |             | 0          | (33)         | +     | (30)                            | 0                | (32) |
|                                                  |                                     |                |       |             |            |              |       |                                 | +                | (38) |
|                                                  |                                     |                |       |             |            |              |       |                                 | -                | (36) |
|                                                  | Parent's occupation (0= unemployed) |                |       |             |            |              |       | -                               | (36)             |      |
|                                                  | Parent's education                  | 0              | (1)   | 0           | (1, 33)    | 0            | (30)  | 0                               | (32)             |      |
| Language                                         |                                     |                |       |             |            |              | 0     | (27)                            |                  |      |
| Race/Ethnicity                                   | +                                   | (Non-Hispanic) | (1)   | +           | (Hispanic) | (1)          |       | - (European-Canadian-Caucasian) | (32)             |      |
| Country of birth                                 |                                     |                |       |             |            |              | 0     | (32, 38)                        |                  |      |
| <b>Family structure factors</b>                  | Family size                         |                |       |             |            | 0            | (30)  |                                 |                  |      |
|                                                  | Number of children in the family    |                |       |             |            |              |       | +                               | (36)             |      |

Note: '+' denotes Positive association, '-' denotes Negative association, '0' denotes No association (significant at 95% confidence level, p<0.05), Empty cells denote that association for that variable has not been studied, '( )' denotes reference.  
 Touchscreens includes combined results for smartphones and tablets while any media includes combination of traditional media with at least one form of mobile screen media devices.

## 1 *Behavioural factors*

2 Ability or skill of children to use mobile screen media devices was the only behavioural skill  
3 studied and was found to have a positive association with frequency and duration of device use  
4 (30) (see Table 5). Furthermore, children who were better skilled in using mobile screen media  
5 devices had greater access to these devices in their bedrooms and spent more time on them than  
6 less-skilled children (30).

## 7 *Sociocultural/ environmental factors*

8 In total, 21 sociocultural/environmental correlates were investigated (see Table 5). Parental  
9 screen time/media use (both mobile and fixed screens) was the most studied variable (1, 27, 30,  
10 31, 33, 35, 37). Two studies concluded that there was no statistically significant association  
11 between parental smartphone use and their children's use (1, 37). Positive associations have also  
12 been reported for parental screen time and children's use of tablets, touchscreen devices or any  
13 media (1, 27, 30, 31, 33, 35). Sigmund et. al. concluded that the association between parental and  
14 children any media use was stronger during weekends than on weekdays (35).

15 Parental attitudes about the effects of mobile screen media on children were positively associated  
16 with smartphone and electronic tablet use for older young children (4-8 years) (31). More  
17 positive parental attitudes towards these devices resulted in greater use by the children (31).

18 Similarly, parental belief in the negative effects of mobile screen media screen devices, was  
19 not associated with children's use of these devices (30). However, children were more likely to  
20 use mobile screen media devices when parents believed that these devices were helpful as a  
21 behavioural regulation tool (30), while parental nurturing and self-efficacy to limit mobile media  
22 use were negatively associated with electronic tablet use (28).



1  
2  
3 23 Children in parental care were more likely to have higher any media use than children in child  
4  
5  
6 24 care (38). Similarly, any media use was higher during weekends than weekdays (35).The number  
7  
8 25 of media devices at home, and in the child's bedroom were positively associated with increased  
9  
10 26 smartphone use (37). Jago et. al. (37) concluded that the greater the number of devices, the  
11  
12 27 greater the use, while Asplund et. al. (27) reported no such association.  
13  
14  
15  
16 28  
17  
18  
19  
20  
21  
22  
23  
24  
25  
26  
27  
28  
29  
30  
31  
32  
33  
34  
35  
36  
37  
38  
39  
40  
41  
42  
43  
44  
45  
46  
47  
48  
49  
50  
51  
52  
53  
54  
55  
56  
57  
58  
59  
60

For peer review only

1 **Table 5: Environmental and behavioural correlates of mobile screen media use and direction of association**

| Variable type                               | Variables                                                               | Smartphones |          | Tablets      |       | Touchscreens |       | Any media device |               |                    |
|---------------------------------------------|-------------------------------------------------------------------------|-------------|----------|--------------|-------|--------------|-------|------------------|---------------|--------------------|
|                                             |                                                                         | Assoc       | Study    | Assoc        | Study | Assoc        | Study | Assoc            | Study         |                    |
| <b>Behavioural factors</b>                  | Child media skills                                                      |             |          |              |       | +            | (30)  |                  |               |                    |
| <b>Sociocultural/ environmental factors</b> | Parental media use/screen time                                          | +           | (>2 yrs) | (31)         | +     | (1, 31, 33)  | +     | (30)             | +             | (27) (≥2 yrs) (35) |
|                                             |                                                                         | 0           |          | (1, 37)      |       |              |       |                  |               |                    |
|                                             | Parent attitudes on effects of media on children                        | +           | (>6 yrs) | (31)         | +     | (>2 yrs)     | (31)  |                  |               |                    |
|                                             | Parental belief that media has positive effects on children             | 0           |          | (37)         |       |              | 0     | (30)             |               |                    |
|                                             | Parental belief that media has negative effects on children             |             |          |              |       |              | 0     | (30)             |               |                    |
|                                             | Parents belief on pacifying nature of media                             |             |          |              |       |              | +     | (30)             |               |                    |
|                                             | Parents belief that media are too complicated for young children to use |             |          |              |       |              | 0     | (30)             |               |                    |
|                                             | Parent's time with child                                                | 0           |          | (1)          | 0     | (1)          |       |                  |               |                    |
|                                             | Parental limit setting on media use                                     | 0           |          | (29) (boys)  |       |              |       |                  |               |                    |
|                                             |                                                                         | +           | (always) | (29) (girls) |       |              |       |                  |               |                    |
|                                             | Collaborative rule setting                                              | 0           |          | (29)         |       |              |       |                  |               |                    |
|                                             | Parental control on media use                                           |             |          |              | 0     | (28)         |       |                  |               |                    |
|                                             | Parental nurturance                                                     |             |          |              | -     | (28)         |       |                  |               |                    |
|                                             | Parental self-efficacy                                                  |             |          |              | -     | (28)         |       |                  |               |                    |
|                                             | Type of child care (0= parental care)                                   |             |          |              |       |              |       |                  | -             | (38)               |
|                                             | Mother's relational well-being                                          |             |          |              | 0     | (33)         |       |                  |               |                    |
|                                             | Mother's personal well-being                                            |             |          |              | 0     | (33)         |       |                  |               |                    |
|                                             | Days of week (0=Weekdays)                                               |             |          |              |       |              |       |                  | +             | (35)               |
| Parental step count/physical activity       |                                                                         |             |          |              |       |              |       | -                | (35)          |                    |
| TV on during dinner                         |                                                                         |             |          |              |       |              |       | +                | (27) (≥2 yrs) |                    |
| Number of TVs/screens at home               | +                                                                       |             | (37)     |              |       |              |       | 0                | (27)          |                    |

1  
2  
3  
4  
5  
6  
7  
8  
9  
10  
11  
12  
13  
14  
15  
16  
17  
18  
19  
20  
21  
22  
23  
24  
25  
26  
27  
28  
29  
30  
31  
32  
33  
34  
35  
36  
37  
38  
39  
40  
41  
42  
43  
44  
45  
46  
47  
48  
49

|  |                                         |   |      |  |  |  |  |  |   |      |
|--|-----------------------------------------|---|------|--|--|--|--|--|---|------|
|  | Computer's outside children's bedroom   |   |      |  |  |  |  |  | + | (36) |
|  | Screen viewing items in child's bedroom | + | (37) |  |  |  |  |  |   |      |

1 Note: '+' denotes Positive association, '-' denotes Negative association, '0' denotes No association (significant at 95% confidence level, p<0.05),  
2 Empty cells denote that association for that variable has not been studied, '( )' denotes reference.  
3 Touchscreens includes combined results for smartphones and tablets while any media includes combination of traditional media with at least one form of mobile screen  
4 media devices.

For peer review only

## 1 DISCUSSION

2 This systematic review identified 36 reported correlates of mobile screen media use among  
3 children aged eight years or less from thirteen studies. Although this review searched for  
4 eligible articles published between 2009 and 2017, the included studies were published  
5 between 2013 and 2017, indicating limited but recent and increasing interest in mobile screen  
6 media use related research.

7 This review found that children aged between four and eight years were more likely to have  
8 higher mobile screen media use. Similarly, those who were better skilled in using the devices,  
9 had more access to media devices at home, and higher parental use of mobile screen media  
10 were more likely to have higher mobile screen media use. The bio-ecological model posits  
11 that human behaviour is affected by intrapersonal factors, inter-personal factors and distal  
12 factors which interact to shape our behaviour (21, 39), however, the findings of this review  
13 suggest that in the case of children aged eight years and less, distal factors such as parental  
14 behaviours, and the home environment can be more influential in shaping their behaviour.

15 The majority of studies in this review reported a positive association between the child's age  
16 and their mobile screen media use. Older children were more likely to use mobile screen  
17 media devices compared to their younger counterparts. This finding is consistent with a  
18 systematic review of traditional screen time use among children three years and younger (17).  
19 Potential reasons for increased mobile screen media use with increasing age include: greater  
20 access/ownership of these devices; decreased parental control and media use rules; and  
21 greater skills as a child ages (40, 41). Studies have found that parents tend to set more rules  
22 regarding screen time for younger children (40) and report that supervising the use of these  
23 devices becomes more difficult as the age of children increases (7). This suggests childhood

1  
2  
3 1 screen habits are reflected in adolescence and adulthood (8), and highlights the importance  
4  
5 2 of managing mobile screen media use with younger children.  
6  
7

8 3 Higher mobile screen media use by older children in the family has influence on younger  
9  
10 4 siblings. One study in the review reported households with more than one child used screen  
11  
12 5 devices (both fixed and mobile screens) more frequently (36), which could be the result of  
13  
14 6 younger children observing and modelling the behaviour of older siblings. Of interest, role  
15  
16 7 modelling either by parents or older siblings has been used effectively in other areas to  
17  
18 8 influence children's behaviours (42, 43), and could be an important strategy to decrease  
19  
20 9 young children's mobile media use.  
21  
22  
23

24 10 This review found no association between child's BMI and mobile screen media use. In  
25  
26 11 contrast to this, a prospective study carried out in Finland reported that the increase in screen  
27  
28 12 time during a two year follow up period was smaller for children who had lower BMI at 13  
29  
30 13 months (44), while a previous research reported a positive association between TV viewing  
31  
32 14 and being overweight but no association with computer use (45).  
33  
34  
35

36 15 Mixed results in regards to parental age and children's mobile screen media use were  
37  
38 16 reported. Three studies reported no association (1, 27, 33), while Wu et. al. found a negative  
39  
40 17 association, indicating higher any media use among children of younger parents (36). A  
41  
42 18 prospective study carried out in Finland has also found that the increase in the screen time  
43  
44 19 was smaller when the mother was younger (44) while previous systematic reviews on  
45  
46 20 traditional media have reported an unclear association with their use and parental age (17-19).  
47  
48 21 Parents who used mobile screen media were more likely to have children who used these  
49  
50 22 devices and for a longer time (1, 27, 30, 31). Furthermore, children of families who watch  
51  
52 23 more TV are more likely to engage in higher screen-viewing (17, 19, 46-48). Therefore,  
53  
54  
55  
56  
57  
58  
59  
60

1 children of parents with higher mobile screen media use may be more likely to have higher  
2 use due to parent role-modelling, thus being considered ‘normal behaviour’ (49).

3 Parent-child co-use of mobile screen media was highest for children younger than two years  
4 and decreased as the child aged (1). This may be due to younger children being less able to  
5 manipulate technology or inability to unlock password protected devices and therefore  
6 requiring parental support to operate the device. Furthermore, younger children may spend  
7 more time at home with their parents, providing more opportunities for parent-child co-use  
8 (1). It should be noted, that decreased co-use with increasing age of children reduces  
9 monitoring opportunities for parents.

10 The review found, children of stay-at-home parents had higher mobile screen media use (36).  
11 This suggests parents could be more engaged in screen-viewing, providing a supportive  
12 environment for mobile screen media use for their children. Conversely self-reported data,  
13 from employed parents might under-report their children’s media use. Other systematic  
14 reviews focusing on children’s traditional screen time report that parental occupation is rarely  
15 studied, thus it is difficult to draw any specific conclusion (17, 18). This is an area worthy of  
16 future research as parents working long hours or bringing their work home may minimise  
17 monitoring of children’s mobile screen media habits.

18 Mixed associations were found between family income and children’s mobile screen media  
19 use. Children from high-income families were using touchscreens for longer durations than  
20 those from low-income families (30), which may be due to greater ownership and access to  
21 touchscreen devices in these households. Conversely, a study on electronic media use (both  
22 fixed and mobile screens) concluded no association between family income and children’s  
23 screen time (50), while, the number of media devices at home, and in the child’s bedroom  
24 were positively associated with mobile screen media use (37), which is consistent with other

1  
2  
3 1 studies (51, 52). It seems that when these devices are in the bedroom, children have easy  
4  
5 2 access and autonomy to use them, ultimately leading to increased use (51). This also holds  
6  
7 3 true in the case of traditional media devices such as televisions and computers (45, 51).  
8  
9

10 4 Use of mobile screen media devices was higher among children whose parents believed in  
11  
12 5 their pacifying effects, with parents using these devices as behavioural regulation tools to  
13  
14 6 secure free time or when busy with household chores or shopping (4, 10, 16, 53, 54). Studies  
15  
16 7 have shown that although parents are aware of the negative effects of using these devices for  
17  
18 8 longer durations, many of them are high screen users themselves and are comfortable  
19  
20 9 allowing their children to use these devices (49, 55). Parents are concerned about their  
21  
22 10 children going online, but research indicates they are less concerned about their children  
23  
24 11 using a smartphone or watching television (7).  
25  
26  
27

### 28 29 ***Methodological limitations of studies reviewed*** 30

31 13 A strength of this study was the protocol paper that guided the methodology of the review  
32  
33 14 (22), however, we did not search the grey literature or include qualitative studies. A major  
34  
35 15 limitation of the studies reviewed was the lack of objective measures to assess children's  
36  
37 16 media use with parental proxy reports used in all of the studies. This approach may  
38  
39 17 underestimate or overestimate true exposure because of recall bias, social desirability bias or  
40  
41 18 simply not being aware of screen viewing behaviours (8). In addition, only one study tested  
42  
43 19 reliability and validity of their instrument (36) while others either relied on previously used  
44  
45 20 questionnaires with unknown validity/reliability estimates. The review was also challenging  
46  
47 21 due to the lack of standardised terminology when researching mobile media screen use  
48  
49 22 research, as well as the lack of standardised reporting of findings by age. The American  
50  
51 23 Academy of Paediatrics (15) recommendations for children screen media uses the aged  
52  
53 24 categories: a) younger than 18 months; b) 18-24 months; c) 2-5 years; and d) 6 and older.  
54  
55  
56  
57  
58  
59  
60

1  
2  
3 1 However, the studies in this review often reported across these age groups or failed to provide  
4  
5 2 detailed information of the targets group's age when undertaking analysis. Finally, meta-  
6  
7 3 analysis was not conducted due to the study findings being segregated across different mobile  
8  
9 4 screen media types, making the findings largely descriptive. Future research in this area  
10  
11 5 should consider undertaking randomised controlled trials with larger sample sizes and  
12  
13 6 (standardised) study outcomes that can be aggregated and compared.  
14  
15  
16

## 17 **CONCLUSION**

18  
19 8 Despite the rapid growth in mobile technologies, this review on the correlates of mobile  
20  
21 9 screen media use among children 0-8 years identified limited but increasing research being  
22  
23 10 undertaken in this area. The review found that correlates such as child's age and media skills,  
24  
25 11 parental media use and access to media devices at home appeared to impact on determining  
26  
27 12 the mobile screen media use. Screen media use can certainly enhance life experiences and  
28  
29 13 learnings, however it is important that it is used appropriately and the family environment can  
30  
31 14 play a key role in the maintaining a "healthy media diet". To better understand the impact of  
32  
33 15 environmental factors on children's mobile screen media and stimulate discussion, we need  
34  
35 16 to better understand the role of parental rules; the use of mobile screen devices as behavioural  
36  
37 17 regulation tools; and the role of parents and older siblings as role models. To achieve this, we  
38  
39 18 need valid and reliable objective measures such as a smartphone/tablet applications that  
40  
41 19 measure the time the screen is on (56), use of standardised terminology, and the reporting of  
42  
43 20 findings against specific age groups. These approaches will support a better understanding of  
44  
45 21 the correlates of mobile screen media use and traditional screen media use when undertaking  
46  
47 22 future research.  
48  
49  
50  
51  
52  
53  
54  
55  
56  
57  
58  
59  
60



1  
2  
3 **1 List of abbreviations used**  
4

5  
6 2 PDA: Personal Digital Assistants  
7

8  
9 3 PRISMA: Preferred Reporting Items for Systematic Reviews and Meta-analyses  
10

11 **4 Declarations:**  
12

13  
14 **5 Ethics approval and consent to participate**  
15

16  
17 6 Since this systematic review uses already published, de-identified data, it is hence exempt  
18  
19 7 from the ethics approval process. It does not involve any contact with the human participants  
20  
21 8 and has not collected any primary data.  
22  
23

24  
25 **9 Consent for publication**  
26

27  
28 10 This is “Not applicable” for this study as it does not report any individual level data.  
29

30  
31 **11 Availability of data and material**  
32

33  
34 12 The findings of this review rely on the data presented on the papers that are already published  
35  
36 13 and are easily accessible on public domains.  
37

38  
39 **14 Competing interests**  
40

41  
42 15 The authors declare that they have no financial and non-financial competing interests.  
43

44  
45 **16 Funding**  
46

47  
48 17 This study has not received any funding from any source.  
49

50  
51 **18 Author’s contribution**  
52

53  
54 19 SP, JL and JJ jointly conceived and designed the study. SP was responsible for searching the  
55  
56 20 literature, screening the papers, working on design, critically reviewing the papers and  
57  
58 21 drafting the manuscript. JJ provided overall supervision for the study, finalised methodology,  
59  
60

1 screening of full text, quality assessment, and edited the manuscript. NS was involved in  
2 searching the database, initial screening of title and abstracts and revised the manuscript. JL  
3 contributed to design, screening of full text, quality assessment, and organised and revised the  
4 manuscript. All authors have read and approved the final version of manuscript.

#### 5 **Acknowledgements**

6 We would like to acknowledge the support of Public health faculty librarian of Curtin  
7 University, Ms. Diana Blackwood for her guidance during the database searching stage.

#### 8 **Author's information**

9 Susan Paudel (BPH, MPH, MHIthProm): School of Public Health, Curtin University,  
10 Western Australia, Email: [repliesusan@gmail.com](mailto:repliesusan@gmail.com)

11 Dr. Jonine Jancey ( BSc (Hons) PhD) : Associate Professor, Collaboration for Evidence,  
12 Research and Impact in Public Health (CERIPH), School of Public Health, Curtin  
13 University, Email: [j.jancey@curtin.edu.au](mailto:j.jancey@curtin.edu.au)

14 Narayan Subedi (BPH, MPH, PGDPHN): Assistant Professor, Department of Community  
15 Medicine and Public Health, Maharajgunj Medical Campus, Institute of Medicine, Tribhuvan  
16 University, Nepal, Email: [subedi.narayan@gmail.com](mailto:subedi.narayan@gmail.com)

17 Dr. Justine Leavy (BSc, MPH, PhD): Senior Lecturer, Collaboration for Evidence, Research  
18 and Impact in Public Health (CERIPH), School of Public Health, Curtin University,  
19 Email: [j.leavy@curtin.edu.au](mailto:j.leavy@curtin.edu.au)

20

## 1 References

1. Connell SL, Lauricella AR, Wartella E. Parental Co-Use of Media Technology with their Young Children in the USA. *Journal of Children and Media*. 2015;9(1):5-21.
2. Holloway D, Green L, Livingstone S. *Zero to eight: Young children and their internet use*. London: LSE, EU Kids Online; 2013.
3. Rideout V. *Zero to eight: Children's media use in America 2013*. United States of America: Common Sense Media, 2013.
4. Kabali HK, Irigoyen MM, Nunez-Davis R, Budacki JG, Mohanty SH, Leister KP, et al. Exposure and use of mobile media devices by young children. *Pediatrics*. 2015;2015-151.
5. Houghton S, Hunter SC, Rosenberg M, Wood L, Zadow C, Martin K, et al. Virtually impossible: limiting Australian children and adolescents daily screen based media use. *BMC Public Health*. 2015;15(1):1.
6. Ofcom. *Communications Market Report Bite-sized*. 2016.
7. Ofcom. *Children and parents: media use and attitudes report*. Ofcom, 2016.
8. Downing KL, Hnatiuk J, Hesketh KD. Prevalence of sedentary behavior in children under 2years: A systematic review. *Preventive Medicine*. 2015;78:105-14.
9. Christakis DA. Interactive media use at younger than the age of 2 years: time to rethink the American Academy of Pediatrics guideline? *JAMA pediatrics*. 2014;168(5):399-400.
10. Radesky JS, Schumacher J, Zuckerman B. Mobile and interactive media use by young children: the good, the bad, and the unknown. *Pediatrics*. 2015;135(1):1-3.
11. Troseth GL, Russo CE, Strouse GA. What's next for research on young children's interactive media? *Journal of Children and Media*. 2016;10(1):54-62.
12. Biddiss E, Irwin J. Active video games to promote physical activity in children and youth: a systematic review. *Arch Pediatr Adolesc Med*. 2010;164(7):664-72.
13. Strasburger V., Hogan M. Policy Statement: children, adolescents and the media. *Pediatrics*. 2013;132:958-61.
14. Department of Health. *Australia's Physical Activity and Sedentary Behaviour Guidelines*: Australian Government; 2015 [Available from: <http://www.health.gov.au/internet/main/publishing.nsf/content/health-publhlth-strateg-phys-act-guidelines#npa05>].
15. American Academy of Pediatrics. *American Academy of Pediatrics Announces New Recommendations for Children's Media Use USA*: American Academy of Pediatrics; 2017 [Available from: <https://www.aap.org/en-us/about-the-aap/aap-press-room/pages/american-academy-of-pediatrics-announces-new-recommendations-for-childrens-media-use.aspx>].
16. Radesky JS, Peacock-Chambers E, Zuckerman B, Silverstein M. Use of Mobile Technology to Calm Upset Children: Associations With Social-Emotional Development. *JAMA Pediatrics*. 2016;170(4):397-9.
17. Duch H, Fisher EM, Ensari I, Harrington A. Screen time use in children under 3 years old: a systematic review of correlates. *Int J Behav Nutr Phys Act*. 2013;10(1):1-10.
18. Hinkley T, Salmon J, Okely AD, Trost SG. Correlates of sedentary behaviours in preschool children: a review. *Int J Behav Nutr Phys Act*. 2010;7(66):10.
19. Cillero IH, Jago R. Systematic review of correlates of screen-viewing among young children. *Preventive Medicine*. 2010;51(1):3-10.
20. Vanderloo LM. Screen-viewing among preschoolers in childcare: A systematic review. *BMC Pediatr*. 2014;14(1):205.
21. Lawman HG, Wilson DK. A review of family and environmental correlates of health behaviors in high-risk youth. *Obesity (Silver Spring)*. 2012;20(6):1142-57.
22. Paudel S, Leavy J, Jancey J. Correlates of mobile screen media use among children aged 0–8: protocol for a systematic review. *Systematic reviews*. 2016;5(1):1.

- 1 23. Moher D, Liberati A, Tetzlaff J, Altman DG, Group P. Preferred reporting items for systematic  
2 reviews and meta-analyses: the PRISMA statement. *International Journal of Surgery*. 2010;8(5):336-  
3 41.
- 4 24. Knobloch K, Yoon U, Vogt PM. Preferred reporting items for systematic reviews and meta-  
5 analyses (PRISMA) statement and publication bias. *Journal of Cranio-Maxillofacial Surgery*.  
6 2011;39(2):91-2.
- 7 25. Liberati A, Altman DG, Tetzlaff J, Mulrow C, Gøtzsche PC, Ioannidis JPA, et al. The PRISMA  
8 statement for reporting systematic reviews and meta-analyses of studies that evaluate health care  
9 interventions: explanation and elaboration. *Journal of Clinical Epidemiology*. 2009;62(10):e1-e34.
- 10 26. Downs SH, Black N. The feasibility of creating a checklist for the assessment of the  
11 methodological quality both of randomised and non-randomised studies of health care  
12 interventions. *Journal of Epidemiology and Community Health*. 1998;52(6):377-84.
- 13 27. Asplund KM, Kair LR, Arain YH, Cervantes M, Oreskovic NM, Zuckerman KE. Early childhood  
14 screen time and parental attitudes toward child television viewing in a low-income latino population  
15 attending the special supplemental nutrition program for women, infants, and children. *Child*.  
16 2015;11(5):590-9.
- 17 28. Jago R, Wood L, Zahra J, Thompson JL, Sebire SJ. Parental control, nurturance, self-efficacy,  
18 and screen viewing among 5-to 6-year-old children: a cross-sectional mediation analysis to inform  
19 potential behavior change strategies. *Child*. 2015;11(2):139-47.
- 20 29. Kesten JM, Sebire SJ, Turner KM, Stewart-Brown S, Bentley G, Jago R. Associations between  
21 rule-based parenting practices and child screen viewing: a cross-sectional study. *Preventive*  
22 *Medicine Reports*. 2015;2:84-9.
- 23 30. Nikken P, Schols M. How and Why Parents Guide the Media Use of Young Children. *Journal*  
24 *of Child and Family Studies*. 2015;24(11):3423-35.
- 25 31. Lauricella AR, Wartella E, Rideout VJ. Young children's screen time: The complex role of  
26 parent and child factors. *Journal of Applied Developmental Psychology*. 2015;36:11-7.
- 27 32. Lee ST, Wong JE, Ong WW, Ismail MN, Deurenberg P, Poh BK. Physical activity pattern of  
28 Malaysian preschoolers: Environment, barriers, and motivators for active play. *Asia-Pacific Journal of*  
29 *Public Health*. 2016;28(5, Suppl):21S-34S.
- 30 33. Pempek T, McDaniel B. Young Children's Tablet Use and Associations with Maternal Well-  
31 Being. *Journal of Child & Family Studies*. 2016;25(8):2636-47.
- 32 34. Pyper E, Harrington D, Manson H. The impact of different types of parental support  
33 behaviours on child physical activity, healthy eating, and screen time: a cross-sectional study. *Bmc*  
34 *Public Health*. 2016;16.
- 35 35. Sigmund E, Badura P, Vokacova J, Sigmundova D. Parent-Child Relationship of Pedometer-  
36 Assessed Physical Activity and Proxy-Reported Screen Time in Czech Families with Preschoolers.  
37 *International Journal of Environmental Research and Public Health*. 2016;13(7).
- 38 36. Wu CST, Fowler C, Lam WYY, Wong HT, Wong CHM, Loke AY. Parenting approaches and  
39 digital technology use of preschool age children in a Chinese community. *Ital*. 2014;40(1):1-8.
- 40 37. Jago R, Sebire SJ, Lucas PJ, Turner KM, Bentley GF, Goodred JK, et al. Parental modelling,  
41 media equipment and screen-viewing among young children: Cross-sectional study. *BMJ Open*.  
42 2013;3(4).
- 43 38. Carson V, Kuzik N. Demographic correlates of screen time and objectively measured  
44 sedentary time and physical activity among toddlers: a cross-sectional study. *Bmc Public Health*.  
45 2017;17.
- 46 39. Bronfenbrenner U, Evans GW. Developmental Science in the 21st Century: Emerging  
47 Questions, Theoretical Models, Research Designs and Empirical Findings. *Social Development*.  
48 2000;9(1):115-25.
- 49 40. Warren R. Parental mediation of preschool children's television viewing. *J Broadcast Electron*  
50 *Media*. 2003;47(3):394-417.

- 1  
2  
3 1 41. Australian Communications and Media Authority (ACMA). Access to the internet, broadband  
4 2 and mobile phones in family households. Australia: 2008.  
5 3 42. Brown R, Ogden J. Children's eating attitudes and behaviour: a study of the modelling and  
6 4 control theories of parental influence. *Health Educ Res.* 2004;19(3):261-71.  
7 5 43. Draxten M, Fulkerson JA, Friend S, Flattum CF, Schow R. Parental role modeling of fruits and  
8 6 vegetables at meals and snacks is associated with children's adequate consumption. *Appetite.*  
9 7 2014;78:1-7.  
10 8 44. Matarma T, Koski P, Löyttyniemi E, Lagström H. The factors associated with toddlers' screen  
11 9 time change in the STEPS Study: A two-year follow-up. *Preventive medicine.* 2016;84:27-33.  
12 10 45. De Jong E, Visscher T, HiraSing R, Heymans M, Seidell J, Renders C. Association between TV  
13 11 viewing, computer use and overweight, determinants and competing activities of screen time in 4-to  
14 12 13-year-old children. *Int J Obes (Lond).* 2013;37(1):47-53.  
15 13 46. Xu H, Wen LM, Rissel C. Associations of parental influences with physical activity and screen  
16 14 time among young children: a systematic review. *Journal of Obesity.* 2015;2015.  
17 15 47. Birken CS, Maguire J, Mekky M, Manhiot C, Beck CE, Jacobson S, et al. Parental factors  
18 16 associated with screen time in pre-school children in primary-care practice: a TARGet Kids! study.  
19 17 *Public Health Nutrition.* 2011;14(12):2134-38.  
20 18 48. Jago R, Thompson JL, Sebire SJ, Wood L, Pool L, Zahra J, et al. Cross-sectional associations  
21 19 between the screen-time of parents and young children: differences by parent and child gender and  
22 20 day of the week. *Int J Behav Nutr Phys Act.* 2014;11(1):54-64.  
23 21 49. Schoeppe S, Rebar AL, Short CE, Alley S, Van Lippevelde W, Vandelanotte C. How is adults'  
24 22 screen time behaviour influencing their views on screen time restrictions for children? A cross-  
25 23 sectional study. *BMC public health.* 2016;16(1):201.  
26 24 50. Vandewater EA, Rideout VJ, Wartella EA, Huang X, Lee JH, Shim M-s. Digital childhood:  
27 25 electronic media and technology use among infants, toddlers, and preschoolers. *Pediatrics.*  
28 26 2007;119(5):e1006-15.  
29 27 51. Veldhuis L, van Grieken A, Renders CM, HiraSing RA, Raat H. Parenting Style, the home  
30 28 environment, and screen time of 5-year-old children; The 'Be Active, Eat Right' Study. *PLoS ONE.*  
31 29 2014;9(2):e88486.  
32 30 52. Dumuid D, Olds TS, Lewis LK, Maher C. Does home equipment contribute to socioeconomic  
33 31 gradients in Australian children's physical activity, sedentary time and screen time? *BMC public*  
34 32 *health.* 2016;16(1):736.  
35 33 53. Chiong C., Shuler C. Learning: Is there an app for that? Investigations of young children's  
36 34 usage and learning with mobile devices and apps. Sesame Workshop; The Joan Ganz Cooney Centre,  
37 35 New York 2010.  
38 36 54. Carson V, Tremblay MS, Spence JC, Timmons BW, Janssen I. The Canadian Sedentary  
39 37 Behaviour Guidelines for the Early Years (zero to four years of age) and screen time among children  
40 38 from Kingston, Ontario. *Paediatrics & child health.* 2013;18(1):25-8.  
41 39 55. He M, Piché L, Beynon C, Harris S. Screen-related Sedentary Behaviors: Children's and  
42 40 Parents' Attitudes, Motivations, and Practices. *Journal of Nutrition Education and Behavior.*  
43 41 2010;42(1):17-25.  
44 42 56. Christensen MA, Bettencourt L, Kaye L, Moturu ST, Nguyen KT, Olgin JE, et al. Direct  
45 43 Measurements of Smartphone Screen-Time: Relationships with Demographics and Sleep. *PLoS ONE.*  
46 44 2016;11(11):e0165331.

45

46

1  
2  
3 1 Figure 1: PRISMA flow chart for study selection  
4  
5  
6  
7  
8  
9  
10  
11  
12  
13  
14  
15  
16  
17  
18  
19  
20  
21  
22  
23  
24  
25  
26  
27  
28  
29  
30  
31  
32  
33  
34  
35  
36  
37  
38  
39  
40  
41  
42  
43  
44  
45  
46  
47  
48  
49  
50  
51  
52  
53  
54  
55  
56  
57  
58  
59  
60

2

For peer review only

1  
2  
3  
4  
5  
6  
7  
8  
9  
10  
11  
12  
13  
14  
15  
16  
17  
18  
19  
20  
21  
22  
23  
24  
25  
26  
27  
28  
29  
30  
31  
32  
33  
34  
35  
36  
37  
38  
39  
40  
41  
42  
43  
44  
45  
46  
47  
48  
49  
50  
51  
52  
53  
54  
55  
56  
57  
58  
59  
60



Figure 1: PRISMA flow chart for study selection

Figure 1: PRISMA flowchart for study selection

297x420mm (300 x 300 DPI)



# PRISMA 2009 Checklist

1  
2  
3  
4  
5  
6  
7  
8  
9  
10  
11  
12  
13  
14  
15  
16  
17  
18  
19  
20  
21  
22  
23  
24  
25  
26  
27  
28  
29  
30  
31  
32  
33  
34  
35  
36  
37  
38  
39  
40  
41  
42  
43  
44  
45  
46  
47  
48  
49

| Section/topic                      | #  | Checklist item                                                                                                                                                                                                                                                                                              | Reported on page # |
|------------------------------------|----|-------------------------------------------------------------------------------------------------------------------------------------------------------------------------------------------------------------------------------------------------------------------------------------------------------------|--------------------|
| <b>TITLE</b>                       |    |                                                                                                                                                                                                                                                                                                             |                    |
| Title                              | 1  | Identify the report as a systematic review, meta-analysis, or both.                                                                                                                                                                                                                                         | 1                  |
| <b>ABSTRACT</b>                    |    |                                                                                                                                                                                                                                                                                                             |                    |
| Structured summary                 | 2  | Provide a structured summary including, as applicable: background; objectives; data sources; study eligibility criteria, participants, and interventions; study appraisal and synthesis methods; results; limitations; conclusions and implications of key findings; systematic review registration number. | 3,4                |
| <b>INTRODUCTION</b>                |    |                                                                                                                                                                                                                                                                                                             |                    |
| Rationale                          | 3  | Describe the rationale for the review in the context of what is already known.                                                                                                                                                                                                                              | 5,6                |
| Objectives                         | 4  | Provide an explicit statement of questions being addressed with reference to participants, interventions, comparisons, outcomes, and study design (PICOS).                                                                                                                                                  | 6,7                |
| <b>METHODS</b>                     |    |                                                                                                                                                                                                                                                                                                             |                    |
| Protocol and registration          | 5  | Indicate if a review protocol exists, if and where it can be accessed (e.g., Web address), and, if available, provide registration information including registration number.                                                                                                                               | 7                  |
| Eligibility criteria               | 6  | Specify study characteristics (e.g., PICOS, length of follow-up) and report characteristics (e.g., years considered, language, publication status) used as criteria for eligibility, giving rationale.                                                                                                      | 8                  |
| Information sources                | 7  | Describe all information sources (e.g., databases with dates of coverage, contact with study authors to identify additional studies) in the search and date last searched.                                                                                                                                  | 9                  |
| Search                             | 8  | Present full electronic search strategy for at least one database, including any limits used, such that it could be repeated.                                                                                                                                                                               | 11                 |
| Study selection                    | 9  | State the process for selecting studies (i.e., screening, eligibility, included in systematic review, and, if applicable, included in the meta-analysis).                                                                                                                                                   | 9,12               |
| Data collection process            | 10 | Describe method of data extraction from reports (e.g., piloted forms, independently, in duplicate) and any processes for obtaining and confirming data from investigators.                                                                                                                                  | 12                 |
| Data items                         | 11 | List and define all variables for which data were sought (e.g., PICOS, funding sources) and any assumptions and simplifications made.                                                                                                                                                                       | 8,9                |
| Risk of bias in individual studies | 12 | Describe methods used for assessing risk of bias of individual studies (including specification of whether this was done at the study or outcome level), and how this information is to be used in any data synthesis.                                                                                      | 12                 |
| Summary measures                   | 13 | State the principal summary measures (e.g., risk ratio, difference in means).                                                                                                                                                                                                                               | 7                  |
| Synthesis of results               | 14 | Describe the methods of handling data and combining results of studies, if done, including measures of consistency (e.g., $I^2$ for each meta-analysis).                                                                                                                                                    | 12                 |





# PRISMA 2009 Checklist

Page 1 of 2

| Section/topic                 | #  | Checklist item                                                                                                                                                                                           | Reported on page # |
|-------------------------------|----|----------------------------------------------------------------------------------------------------------------------------------------------------------------------------------------------------------|--------------------|
| Risk of bias across studies   | 15 | Specify any assessment of risk of bias that may affect the cumulative evidence (e.g., publication bias, selective reporting within studies).                                                             | 12                 |
| Additional analyses           | 16 | Describe methods of additional analyses (e.g., sensitivity or subgroup analyses, meta-regression), if done, indicating which were pre-specified.                                                         | 12                 |
| <b>RESULTS</b>                |    |                                                                                                                                                                                                          |                    |
| Study selection               | 17 | Give numbers of studies screened, assessed for eligibility, and included in the review, with reasons for exclusions at each stage, ideally with a flow diagram.                                          | 12,13              |
| Study characteristics         | 18 | For each study, present characteristics for which data were extracted (e.g., study size, PICOS, follow-up period) and provide the citations.                                                             | 12,13              |
| Risk of bias within studies   | 19 | Present data on risk of bias of each study and, if available, any outcome level assessment (see item 12).                                                                                                | 13,14              |
| Results of individual studies | 20 | For all outcomes considered (benefits or harms), present, for each study: (a) simple summary data for each intervention group (b) effect estimates and confidence intervals, ideally with a forest plot. | 13-23              |
| Synthesis of results          | 21 | Present results of each meta-analysis done, including confidence intervals and measures of consistency.                                                                                                  |                    |
| Risk of bias across studies   | 22 | Present results of any assessment of risk of bias across studies (see Item 15).                                                                                                                          |                    |
| Additional analysis           | 23 | Give results of additional analyses, if done (e.g., sensitivity or subgroup analyses, meta-regression [see Item 16]).                                                                                    |                    |
| <b>DISCUSSION</b>             |    |                                                                                                                                                                                                          |                    |
| Summary of evidence           | 24 | Summarize the main findings including the strength of evidence for each main outcome; consider their relevance to key groups (e.g., healthcare providers, users, and policy makers).                     | 24-26              |
| Limitations                   | 25 | Discuss limitations at study and outcome level (e.g., risk of bias), and at review-level (e.g., incomplete retrieval of identified research, reporting bias).                                            | 26-27              |
| Conclusions                   | 26 | Provide a general interpretation of the results in the context of other evidence, and implications for future research.                                                                                  | 27                 |
| <b>FUNDING</b>                |    |                                                                                                                                                                                                          |                    |
| Funding                       | 27 | Describe sources of funding for the systematic review and other support (e.g., supply of data); role of funders for the systematic review.                                                               |                    |

From: Moher D, Liberati A, Tetzlaff J, Altman DG, The PRISMA Group (2009). Preferred Reporting Items for Systematic Reviews and Meta-Analyses: The PRISMA Statement. PLoS Med 6(6): e1000097. doi:10.1371/journal.pmed1000097

For more information, visit: [www.prisma-statement.org](http://www.prisma-statement.org).

Page 2 of 2

For peer review only - <http://bmjopen.bmj.com/site/about/guidelines.xhtml>
